# Supplementary material for: Gain of 1q confers an MDM4-driven growth advantage to undifferentiated and differentiating hESC while altering their differentiation capacity
Source: Cell Death Dis. 2024 Nov 21;15(11):852. doi: 10.1038/s41419-024-07236-x (PMC11582570; doi:10.1038/s41419-024-07236-x)
Supplement: Supplementary file 7 — Table S6 [file 41419_2024_7236_MOESM7_ESM.xlsx]

## Sheet: CPM_count_hESC_vs_CP_1q
gene_id,VUB02_hESC_1,VUB02_hESC_2,VUB02_hESC_4,VUB02_hESC_3,VUB03_hESC_1,VUB03_hESC_2,VUB03_hESC_5,VUB03_hESC_6,VUB03_hESC_3,VUB03_hESC_4,VUB04_hESC_4,VUB04_hESC_3,VUB04_hESC_5,VUB04_hESC_6,VUB04_hESC_1,VUB04_hESC_2,VUB13_hESC_1,VUB13_hESC_7,VUB13_hESC_8,VUB13_hESC_5,VUB13_hESC_9,VUB13_hESC_10,VUB13_hESC_4,VUB13_hESC_6,VUB13_hESC_2,VUB13_hESC_3,VUB14_hESC_9,VUB14_hESC_8,VUB14_hESC_10,VUB14_hESC_1…
ENSG00000000003,61.1585863398458,56.9539666813531,92.4540980419294,94.4633616380924,94.7286354509324,86.280159407295,115.619354395526,126.441296265408,71.656693880934,66.7183214188771,85.3712707950499,89.3401279084826,138.310733311058,139.977307931068,85.4836605852226,84.220015856006,110.958443329095,104.942632082383,101.22272851797,112.027659051558,105.446017989969,109.165262807939,106.287173726…
ENSG00000000005,0.891324688809412,0.94311996344467,2.35766370234428,2.17073983082556,1.43441301409649,1.67128638077085,2.40645770738087,1.41591597161711,0.923685692069551,0.678909838674975,1.99698879052748,1.47669632906583,3.66553462738924,3.84025536162053,1.98878953627874,2.17214577823228,1.9322144633077,2.6686442522668,1.92398005630777,1.84787891219064,1.94879080230849,2.85258372291277,2.584904…
ENSG00000000419,80.2877854304478,85.0379833705944,55.1244227548116,55.1006127057888,51.4667389457822,45.3336430784092,63.5523603631038,67.8931708390407,58.0500931092941,55.6088876951048,63.1547705004317,62.6119243523911,59.4701393857461,64.351707702584,54.7945806719557,54.3365557554771,71.2863804122458,54.454767850309,56.2586020168513,59.6454248879313,57.7123830370393,56.8359328321527,69.82642165…
ENSG00000000457,9.39319095129918,8.33089301042792,6.23096835619561,6.58457748683754,10.213020660367,10.8633614750105,8.64137085832221,8.77867902402611,9.34343603901123,8.4555134453156,8.1127669615179,7.60498609468902,6.54108334370321,5.97982620595196,10.3554213785548,10.8278175914912,8.05774542145338,8.11412103729769,6.91207649858718,9.95801413791624,8.31171016888198,7.33521528748998,9.5913545570…
ENSG00000000460,37.504200367596,31.0181676866247,31.5197183063408,32.018412504677,35.1144305850822,32.6945398238297,38.1751699943601,39.1500766152132,38.9013781852369,37.1857434365157,39.5653404123258,34.8500333659536,33.3374054473763,35.4400709086694,38.1641854116938,34.7543324517164,40.9053912976843,21.7097816197921,23.1590191962972,37.0089082135959,25.1229657646998,25.6492822144257,38.73954907…
ENSG00000000938,0.617070938406516,0.523955535247039,0.252606825251173,0.108536991541278,0.344259123383158,0.313366196394534,0.109384441244585,0.212387395742567,0.106579118315717,0.154297690607949,0,0,0.189596618658064,0.192012768081026,0.20573684858056,0.296201697031674,0.0411109460278234,0.14425104066307,0.0712585206039915,0.256649848915367,0.211314665310559,0.215741626102646,0.306107060332137,0…
ENSG00000000971,0,0,0.0280674250279081,0,0,0,0,0,0,0,0,0.147669632906583,0,0,0,0,0,0,0,0.0513299697830734,0,0,0.0340118955924597,0,0.0622584857148683,0.0516064534179638,0,0.0292239014340928,0,0,0,0,0,0,0,0,0,0,0.0588236643601712,0,0,0,0.102126675681729,0.47772228131116,0.32550529271606,0.382378115473493
ENSG00000001036,34.3502822379627,32.9568031670388,48.3321058980578,41.0269828026031,56.2863666731464,56.7192815474106,37.7376322293818,40.6367883854112,42.240857225796,42.431864917186,42.9352589963409,42.3811846441893,44.365608765987,45.9459123622456,54.0745017019238,48.478344414184,28.4487746512538,32.9974255516773,31.3893783260583,29.8740424137487,33.9042640787163,34.3508611338992,26.3252071885…
ENSG00000001084,78.1623188648253,72.201072757042,74.238339198817,75.9035360845338,60.6469822359997,60.1663097077505,91.3360084392284,97.7689978401618,65.1908940364471,70.7300613746838,66.0254418868149,64.3839599472701,106.553299685832,109.118113060903,57.2634228549225,56.8378145304112,75.2330312309168,76.0563611896037,73.5744225236212,75.3780606264433,70.4147423629295,74.0473203367861,77.54712195…
ENSG00000001167,52.656720077356,54.6485623262662,89.0298721885246,86.7210562414812,59.4420753041587,63.1955162728977,67.5995846891535,67.0436212560704,59.968517238977,59.7132062652762,49.9247197631871,55.0069382577021,59.6913354408472,60.7034651090445,54.2802385505044,52.9213698696591,65.5308479683505,71.0797002867278,66.697975285336,65.3173865489609,58.604600512795,65.6333969187829,67.3775651686…
ENSG00000001460,8.98181032569484,9.74557295559493,5.10827135507928,4.66709063627496,11.3605510716442,9.92326288582691,4.15660876729423,5.23888909498333,8.91711956574836,8.48637298343719,12.2315563419808,10.2630394870075,5.84589574195698,5.78781343787094,12.5156582886507,11.9468017802775,5.34442298361704,6.27492026884355,5.16624274378938,7.28885570919642,6.99686336250517,6.78387557633877,5.8840579…
ENSG00000001461,14.8782659593571,13.9372172375712,14.6511958645681,16.3529067255526,19.1637578683291,19.2197933788647,17.6108950403782,16.8494000622437,19.219767669601,18.1454084154948,22.5909356928422,21.0429226891881,20.4764348150709,19.9967582758669,20.3679480094754,19.5164007044203,15.0054953001555,16.6970579567504,13.3966018735504,15.2193360406813,15.5668470112112,15.7731099972824,16.5297812…
ENSG00000001497,89.0639054433404,84.0948634071498,75.0522945246264,75.7226410986317,115.728441977305,113.334107696023,133.558402759638,133.520876123494,86.4711913268187,91.5293900686353,82.2509758098507,83.5810122251259,87.7200355657977,87.6401134312684,83.186265776073,82.8377412698581,135.255012431539,131.593011844886,129.654878238963,120.497104065765,126.694881557308,120.743396742114,139.482783…
ENSG00000001561,7.40485126087819,9.11682631329848,4.93986680491183,5.93335553758987,15.4916605522421,18.175239390883,8.42260197583304,9.06186221834954,12.3276513518513,11.3871695668666,10.6090029496773,10.4107091199141,5.43510306819784,7.26905479163885,13.098579359629,12.9012294707129,8.9621862340655,5.37335126469936,6.27074981315125,10.1633340170485,8.40562779790889,7.1674162449657,9.65937834825…
ENSG00000001617,23.0373150338433,22.6348791226721,14.6511958645681,13.2776919652164,27.0243411855779,28.7252346694989,15.2044373329973,15.71666728495,27.1066224249641,28.9462467580512,21.5924412975784,19.2708870943091,14.5357407637849,14.6752615604784,28.048790356483,28.5670081137214,29.5176592479772,28.4174550106248,25.8312137189469,25.1003552239229,25.6395127243478,24.4027750413882,24.760659991…
ENSG00000001626,1.50839562721593,1.67665771279052,5.30474333027464,4.52237464755325,2.23768430199053,2.61138496995445,2.73461103111462,3.18581093613851,2.16710873908625,1.88243182541698,3.99397758105497,3.02722747458495,3.50753744517419,3.81282496618038,3.84042117350378,4.17973505811362,1.52110500302947,0.613066922818048,1.99523857691176,1.48856912370913,1.17397036283644,1.15062200588078,1.326463…
ENSG00000001629,98.2514060818375,98.7132228405422,79.8237567793708,84.0076314529493,100.63841706901,94.6365913111492,82.8040220221508,87.9283818374228,91.9067263609203,89.7086773194615,101.34718111927,95.4684176741058,82.790523480688,81.2762616891544,90.0784502035218,92.5136633728928,95.9940589749676,91.0224066583972,82.4104790785162,95.8843835547811,85.8172335233436,91.4984207593113,92.240260846…
ENSG00000001630,212.752346875046,201.146529981338,292.827445316166,287.87628056465,192.785109094569,186.243976057151,282.321242852274,266.050611066856,240.193806310855,227.49651503236,243.258197046129,246.97746103626,279.81300970286,286.510480372331,183.414400509569,177.095703525271,181.751492389007,132.458518088864,133.075287227954,164.948857897906,146.018433729596,156.125023422948,184.514533589…
ENSG00000001631,37.0242563043909,39.4014562505773,35.757899485555,35.7086702170805,40.909459162032,29.0386008658935,45.7226964402365,42.4066833499326,42.9513846812341,37.6486365083395,42.9352589963409,45.4822469352275,42.9436341260515,41.7490618599032,37.5126853911887,39.1315353078511,37.0409623710689,28.3453294902933,35.8786651241097,38.3434874279558,31.0632558006521,36.4603348113473,38.26338254…
ENSG00000002016,5.55363844565864,5.86830199476684,5.38894560535836,4.16058467574899,8.09008939950422,8.66979810024877,8.53198641707762,7.50435464957071,8.84606682020454,8.67153021216673,8.86163775796571,7.90032536050218,5.27710588598279,4.19685050234243,8.8809739637275,9.57718820402413,8.22218920556468,4.86847262237862,6.66267167647321,11.3182583371677,6.33943995931676,5.75311002940391,10.6797352…
ENSG00000002079,0,0.0523955535247039,0,0,0,0,0,0,0,0.123438152486359,0,0.0738348164532914,0,0.0548607908802932,0,0,0,0.0360627601657675,0,0.0513299697830734,0,0.0479425835783659,0.0340118955924597,0,0,0.0258032267089819,0.132943352870578,0.0292239014340928,0.066523519140729,0.0613215624550149,0.144870994552416,0.0390307067450096,0,0,0,0,0,0,0,0,0,0,0.102126675681729,0,0.0542508821193433,0
ENSG00000002330,6.03358250886371,6.96860861878562,5.41701303038627,5.1374175996205,7.63107723499334,7.72969951106517,3.6096865610713,3.0442193389768,4.93816581529491,5.49299778564298,4.36841297927887,3.69174082266457,4.48711997490752,5.12948394730742,6.24068440694365,5.06834014920864,5.01553541539445,6.09460646801471,4.84557940107142,5.28698688765656,5.3063460400207,4.96205740036087,5.57795087716…
ENSG00000002549,47.445898819701,50.9284780260122,51.3914552260998,51.4827129877462,49.0569250821001,48.8851266375473,62.1303626269242,61.3091615710211,61.7093095048004,60.5155542564376,54.5427563412819,51.6105367008507,52.5498628047268,51.7062954046764,40.5987381198971,43.2454477666244,48.3053615826925,38.010149214719,38.7290059482694,41.3462906602656,41.4881126226397,41.278564460973,47.344558664…
ENSG00000002586,26.7397406642824,26.8789189581731,39.2663276140435,39.6521809097469,40.3930704769572,43.3489905012439,19.1422772178024,24.9201211004612,21.3513500359154,20.614171465222,21.3428176987625,20.6737486069216,22.8463925482967,20.7922397436311,24.51697445585,25.308789446373,17.6777067919641,19.8345180911721,17.9927764525079,19.3000686384356,22.7515456317702,20.4235406043839,15.9515790328…
ENSG00000002587,0.34281718800362,1.10030662401878,0.392943950390714,0.289431977443408,0.516388685074737,0.313366196394534,0.875075529956679,0.141591597161711,0.568421964350493,0.555471686188616,0.624058997039839,0.664513348079623,0.537190419531182,0.685759886003665,0.994394768139372,0.65822599340372,0.0822218920556468,0.28850208132614,0.142517041207983,0.615959637396881,0.234794072567287,0.527368…
ENSG00000002726,0.205690312802172,0.0523955535247039,0.0842022750837244,0.108536991541278,0.401635643947018,0.313366196394534,0,0,0.390790100490964,0.493752609945437,0.374435398223903,0.369174082266457,0.0631988728860214,0.0274303954401466,0.20573684858056,0.16455649835093,0.0411109460278234,0.14425104066307,0.106887780905987,0.0513299697830734,0.117397036283644,0.0719138753675488,0,0,0.249033942…
ENSG00000002745,0.34281718800362,0.157186660574112,0.336809100334898,0.54268495770639,0.344259123383158,0.313366196394534,0,0,0.213158236631435,0.0925786143647694,0.124811799407968,0.221504449359874,0.252795491544086,0.192012768081026,0.342894747634266,0.296201697031674,0.205554730139117,0.252439321160373,0.427551123623949,0.333644803589977,0.610464588674947,0.40751196041611,0.204071373554758,0.2…
ENSG00000002746,8.15904907448615,9.58838629502081,3.64876525362806,4.37765865883155,5.50814597413053,7.72969951106517,8.86013974081138,8.07072103821755,9.23685692069551,10.0602094276383,5.36690737454261,5.75911568335673,5.68789855974193,5.59580066978991,6.99505285173903,7.79997802183408,9.6610723165385,5.84216714685434,5.34438904529936,7.36585066387103,6.1281252940062,5.77708132119309,8.911116645…
ENSG00000002822,15.4267734601629,16.8713682349547,13.8653079637866,13.3138709623968,15.2621544699867,20.5777135632411,13.4542862730839,10.4777781899667,12.9671260617456,14.5039829171472,13.8541097342844,12.1089098983398,9.51143036934622,11.9870828073441,12.5156582886507,12.8683181710427,11.5521758338184,14.6775433874674,13.5747481750604,12.242197793263,12.7962769549172,13.1842104840506,13.4687106…
ENSG00000002834,248.679588177826,234.47010202305,257.687029181225,239.070813368255,232.94867348927,227.921680177624,228.722866642427,211.467050361016,241.863545831135,242.370812406966,249.748410615343,251.850558922177,255.26024758664,257.790856346498,226.070507115272,224.487975050339,261.424505790929,242.341748313958,221.328964995998,205.499534026534,221.246454580155,223.580238517709,250.66767051…
ENSG00000002919,14.398321896152,16.6093904673311,20.4892202703729,17.83624560995,15.4916605522421,14.8326666293413,13.2355173905948,14.5131387090754,14.6723919547971,14.5348424552688,16.7247811206677,14.4716240248451,15.8629170943914,18.3783649448982,15.7731583911762,15.6986899426787,14.676607731933,20.2672712131613,17.8858886716019,14.1157416903452,16.8582144103312,17.0196171703199,13.8768534017…
ENSG00000002933,0.205690312802172,0.209582214098816,0.140337125139541,0.144715988721704,0.172129561691579,0.313366196394534,0.328153323733755,0.212387395742567,0,0.246876304972718,0.499247197631871,0.147669632906583,0.0947983093290321,0.16458237264088,0.0342894747634266,0.230379097691302,0,0.14425104066307,0.213775561811974,0.0769949546746101,0.093917629026915,0.167799042524281,0,0.28279971148773…
ENSG00000003056,123.619877994105,107.253698065069,106.319406005716,108.392275552556,118.138255840987,116.154403463574,100.633685945018,102.512316345079,115.283079644834,121.617439737185,121.067445425729,121.975116780837,114.674354851686,118.609029883194,114.08108253792,112.457910973026,105.408465615339,106.565456289843,103.00419153307,96.3976832526118,106.713905981832,108.637894388577,103.1240674…
ENSG00000003096,11.5186575169216,11.5794173289596,15.4932186154053,13.9650929116444,24.4997742807681,24.65147411637,19.7985838652699,21.592718567161,14.4237073453938,13.39303954477,34.3232448371911,28.8694132332369,16.5581046961376,15.5530342145631,36.5182906230494,34.9518002497375,20.9254715281621,20.159082932664,19.4535761248897,26.4862644080659,18.1026229949379,22.1255023214159,20.883303893770…
ENSG00000003137,0.205690312802172,0.366768874672927,0.140337125139541,0.18089498590213,0.344259123383158,0.835643190385424,0.109384441244585,0.0707957985808557,0.106579118315717,0.123438152486359,0.249623598815935,0,0.0631988728860214,0.16458237264088,0.137157899053707,0.131645198680744,0.0822218920556468,0.324564841491908,0.49880964422794,0.359309788481514,0.258273479824016,0.191770334313464,0.1…
ENSG00000003147,23.3801322218469,25.307052352432,28.3761667032151,27.2066058796804,29.4915315698239,31.5455304370497,20.564274953982,21.7343101643227,25.9342521234912,25.3973998740684,21.8420648963944,23.1841323663335,19.0544601751354,19.8047455077859,28.6317114274612,29.554347103827,21.6654685566629,21.7819071401236,23.0521314153913,22.37986682542,26.1091008694824,21.2625358170053,20.37312545988…
ENSG00000003249,46.6231375684923,46.0556915482147,58.9135251335792,54.9558967170671,44.2946738752997,48.0494834471619,48.0197697063728,54.8667439001632,36.6632167006068,37.8029341989475,44.4330005892365,38.4679393721648,59.3437416399741,58.7010462419138,38.8499749069624,36.7948330312679,35.8076339902342,43.3835004794183,40.7242445251811,34.4937396942253,40.2437040380331,41.014880251292,32.0051937…
ENSG00000003393,102.708029525885,109.139937991958,97.7307739471761,100.252001186961,109.302271674153,103.619755607793,87.0700152306896,84.0346129154758,93.5764658811999,97.7321572310749,121.566692623361,97.4619577183447,99.4434264861547,90.4928745570437,105.200108574193,112.161709275994,96.6518341114128,99.280778736358,93.6336960736448,100.093441076993,92.0862352608901,93.7277508957053,93.2266058…
ENSG00000003400,5.48507500805792,6.33986197648917,5.22054105519091,5.06505960525964,11.2457980305165,9.92326288582691,5.25045317974008,4.9557059006599,6.00395699845208,6.6348006961418,6.24058997039839,5.38994160109027,8.24745291162579,8.50342258644545,10.0125266309206,10.0379463994067,10.483291237095,9.23206660243649,9.54864176093486,12.0112129292392,9.69699519702897,7.93449758221955,9.9654854085…
ENSG00000003402,13.918377832947,15.1947105221641,16.1107019660193,15.882579762207,14.1146240587095,13.474746444965,13.3449018318394,14.0883639175903,12.7184414523423,10.8008383425564,21.2180058993545,23.1102975498802,15.1361300562021,15.2787302601617,12.2070530157799,13.0328746693937,13.8543888113765,14.0284137044836,14.2517041207983,13.4741170680568,14.3928766483747,14.8142583257151,14.591103209…
ENSG00000003436,10.3530790777093,11.8413950965831,4.1539789041304,4.73944863063581,5.45076945356667,4.2826713507253,4.48476209102798,5.73445968504932,2.59342521234912,2.37618443536241,4.49322477868684,5.68528086690344,15.4837238570752,15.6627557963237,4.35476329495518,4.14682375844344,9.24996285626026,7.42892859414811,9.72678806244484,8.23846015018328,10.8005273380952,9.22894733883543,12.82248463…
ENSG00000003509,56.633399458198,62.2983131408729,29.4707962793035,30.6797896090013,40.3356939563934,39.5885961445094,32.0496412846634,34.1235749159725,34.9224244347834,30.9521167359546,35.5713628312708,37.1389126760056,28.6290894173677,29.2956623300766,34.0151589653192,38.1771076174158,40.2065052152113,36.5315760479225,40.7955030457851,46.1713078198745,43.2960269814078,39.3368898260492,38.7735609…
ENSG00000003756,67.1921688487095,63.0318508902188,65.5935722902213,67.4014717471337,78.8927157753071,76.2524411226699,70.0060423965344,73.0612641354431,79.6856541273847,74.5875036398825,78.0073746299798,70.0692408141736,64.6524469623999,60.7308955044846,71.0135022350565,76.7820621305439,66.5997325650739,59.6838680743453,66.3416826823161,73.4275217746865,64.1692200326397,65.4416265844694,65.540922…
ENSG00000003987,14.0555047081484,13.4656572558489,14.679263289596,15.0504628270572,16.0654257578807,16.8173192065067,11.1572130069477,12.1060815573263,18.9710830601977,18.5465824110755,21.2180058993545,16.9081729678037,11.0282033186107,9.65549919493161,19.7507374637337,19.3518442060694,11.1410663735401,8.79931348044728,9.15671989761291,14.346726554369,11.3875125195134,11.6500478095429,12.00619914…
ENSG00000003989,91.6007526345672,98.1368717517704,64.1902010388259,58.7908704181923,73.1550637189211,69.8806617959811,69.1309668665777,57.8401674405591,73.9659081111079,71.5632689039667,85.7457061932738,86.5344048832576,59.6913354408472,57.7684127969488,94.3646345489501,96.1668176362835,74.2874794722769,71.1518258070593,63.5982296390624,69.7830939200883,67.9259251937163,70.235884942306,74.1459323…
ENSG00000004059,35.1730434891714,38.8775007153303,48.1637013478904,41.3164147800465,48.3684068353337,44.1846336916293,35.1124056395118,34.9731244989427,43.2000692906375,44.4068753569677,40.6886466069975,38.8371134544313,37.7929259858408,39.8289341790929,43.6162118990787,39.2960918062021,36.0954106124289,43.9965674022364,39.9404007985372,36.8035883344636,39.7036776711283,41.1587080020271,35.202311…
ENSG00000004139,3.01679125443185,4.97757758484687,8.64476690859571,6.76547247273967,4.93438076849194,5.53613613630343,5.797375385963,6.65480506660044,9.45001515732694,10.6465406519485,4.11878938046293,5.24227196818369,4.01312842826236,4.96490157466654,5.34915806309455,6.8126390317285,7.68774690720297,5.33728850453359,7.33962762221112,4.79935217471736,6.38639877383022,6.35239232413348,5.8500460419…
ENSG00000004142,55.7420747693886,56.0632422714332,60.6817729103374,55.4262236804127,69.8272255262173,72.2831359683392,68.255891336621,62.1587111539913,68.8145840591815,74.1554701061803,67.7728070785265,69.5523970990005,65.4740323099182,66.5461393377957,63.092633564705,60.2605896961106,66.9697310793243,60.801813639484,51.1992470539679,56.7966115649707,57.4306301499585,57.5071290022499,64.894696790…
ENSG00000004399,29.550841605912,34.6334608798293,31.9407296817595,31.3671905554294,41.8274834910537,43.0356243048493,30.9557968722175,37.6633648450153,31.7605772580838,29.9646115160637,32.9503150437035,25.325342043479,41.7428555412171,36.7841602852366,32.9864747224164,32.911299670186,37.246517101208,41.4721741906326,38.9784107703833,29.7970474590741,37.308778130942,37.5390429418605,34.14794317482…
ENSG00000004455,91.4636257593658,87.6053654933049,85.8021183103152,82.3433975826496,94.6712589303685,89.3093659724422,114.087972218102,112.282136549237,99.1185800336172,94.4919057283079,77.0088802347161,76.4190350291566,105.636916028985,112.108026163879,78.8657919558812,78.1314254170215,106.312906427951,97.261264167075,95.6289346505566,96.1153684188049,94.5280936155899,92.0737317622517,101.797603…
ENSG00000004468,0.34281718800362,0.209582214098816,0.280674250279081,0.397968968984686,0.573765205638597,0.940098589183602,0.328153323733755,0.353978992904279,0.248684609403341,0.370314457459077,0.624058997039839,0.664513348079623,0.47399154664516,0.329164745281759,0.582921070978253,0.49366949505279,0.616664190417351,1.47857316679647,1.42517041207983,0.795614531637638,1.17397036283644,1.270478464…
ENSG00000004478,438.806000644633,432.892063221104,347.727328670754,311.067017757303,371.398217609864,385.23151076768,375.079249027682,363.465629914113,387.73483243258,407.808796276809,457.56005662961,455.634652333261,316.499955413195,331.22202493977,426.629645006554,422.350708667497,461.675923892457,332.678962529205,284.820306854154,392.545943916054,282.645104556501,318.434640127506,434.059811550…
ENSG00000004487,381.966910873633,372.165616685972,338.493145836572,326.008943592819,357.857358756793,349.089942783511,293.369071417977,284.811497690783,368.90585486347,359.390180964035,351.844462531061,351.822900399934,288.344857542473,300.280538883285,344.574931897674,348.53066350727,353.266359217086,329.757878955778,291.874900393949,328.075501868514,319.226021062484,317.020333911944,348.7919893…
ENSG00000004534,108.398794846745,102.485702694321,99.611291424046,104.123153885266,91.1139146554092,90.3539199604239,104.462141388579,104.706986101086,103.133060156843,98.2259098410203,98.2268861340706,118.874054489799,103.077361677101,100.230664938296,113.463871992179,122.956615567815,104.504024802727,95.241749597792,95.7714516917646,126.477045545493,95.2324758332918,97.3474159558719,106.8993878…
ENSG00000004660,7.67910501128109,6.60183974411269,7.83081158278637,7.12726244454393,9.06549024908984,10.1321736834233,4.59414653227257,5.30968489356418,7.46053828210022,7.77660360664063,10.7338147490852,6.64513348079623,5.59310025041289,4.93747117922639,8.02373709464183,8.49111531490799,7.68774690720297,14.3890413061412,13.6103774353624,8.44378002931557,12.2562505880124,11.2185645573376,6.8023791…
ENSG00000004700,90.8465548209593,83.8328856395262,77.1854188267474,78.3275288956224,79.753363583765,76.9836289142572,72.740653427649,74.9727506971262,72.2606422180564,64.3729965216363,89.9893073731447,84.6885344719253,93.5659313077547,88.3807341081524,80.85458149216,80.5010389932749,85.4696567918448,80.6363317306562,79.9876893779805,77.1746095688508,80.0412993381883,81.6222485421679,84.6215962340…
ENSG00000004766,11.175840328918,12.3129550783054,10.6656215106051,11.6858160892776,14.1146240587095,17.3395962004975,12.4698263018827,11.6813067658412,18.1539764864439,16.2629765900778,17.3488401177075,17.7941907652432,10.3962145897505,8.44856179556516,13.7500793801341,14.15185885818,12.5388385384861,11.9728363750348,11.1875877348267,12.6015075817445,10.8474861526087,11.6740191013321,13.706793923…
ENSG00000004776,0.34281718800362,0.628746642296447,0.252606825251173,0.36178997180426,0.172129561691579,0.731187791587246,0.109384441244585,0.353978992904279,0.390790100490964,0.277735843094308,0,0.147669632906583,0.0947983093290321,0.0822911863204399,0.342894747634266,0.559492094393162,0.205554730139117,0.252439321160373,0.285034082415966,0.487634712939197,0.540026366904761,0.311626793259378,0.3…
ENSG00000004777,12.1357284553281,14.8279416474912,6.37130548133515,7.66994740225032,12.0490693184105,13.2658356473686,10.282137476991,7.92912944105584,9.7697525122741,11.356310028745,8.36239056033384,9.30318687311472,6.54108334370321,6.72044688283592,12.0356056419627,12.2430034773092,12.2099509702635,10.710639769233,10.1543391860688,13.6024419925144,10.7066097090683,10.2836841775595,11.8361396661…
ENSG00000004779,61.5014035278494,62.2459175873482,48.2479036229741,48.9863621822969,53.8765528094643,50.9742346135108,56.661140564695,57.6277800448166,47.7119186326695,47.3385314785187,49.6750961643711,53.3825722957297,54.6354256099655,54.065309412529,55.6861070158048,51.5390952835113,54.9242238931721,56.8709727814154,67.374931231074,61.3393138907727,65.3431903954761,63.4759806577564,56.799865639…
ENSG00000004799,0.617070938406516,0.366768874672927,0.140337125139541,0.253252980262982,0.114753041127719,0.940098589183602,0.21876888248917,0,0.177631863859529,0.0308595381215898,0.499247197631871,0.295339265813166,0.315994364430107,0.192012768081026,0.617210545741679,0.82278249175465,0.616664190417351,0.216376560994605,0.356292603019958,0.30797981869844,0.493067552391304,0.527368419362025,0.408…
ENSG00000004809,0.274253750402896,0,0.0842022750837244,0.108536991541278,0.0573765205638597,0,0.109384441244585,0,0.0710527455438116,0.0617190762431796,0.124811799407968,0.51684371517304,0.0315994364430107,0.0548607908802932,0.137157899053707,0.230379097691302,0,0,0,0.0513299697830734,0,0.0239712917891829,0.0340118955924597,0,0.124516971429737,0,0.132943352870578,0.0584478028681856,0.033261759570…
ENSG00000004838,0.205690312802172,0.0523955535247039,0.0842022750837244,0.036178997180426,0.0573765205638597,0,0.21876888248917,0.141591597161711,0.0355263727719058,0,0,0.0738348164532914,0.157997182215053,0.192012768081026,0.0685789495268533,0.098733899010558,0.164443784111294,0.14425104066307,0.142517041207983,0,0.093917629026915,0.119856458945915,0.0340118955924597,0.0471332852479557,0.0933877…
ENSG00000004846,0.205690312802172,0,0.0280674250279081,0,0,0,0,0.0707957985808557,0.142105491087623,0.0308595381215898,0.249623598815935,0.443008898719749,0,0,0,0.032911299670186,0,0.0360627601657675,0.178146301509979,0,0,0.119856458945915,0,0.0471332852479557,0.0311292428574341,0,0.0332358382176444,0,0.066523519140729,0.0306607812275074,0.036217748638104,0.117092120235029,0,0,0.0665176516062832,…
ENSG00000004848,0.068563437600724,0.366768874672927,0.168404550167449,0.18089498590213,0.286882602819299,0.313366196394534,0,0.141591597161711,0.106579118315717,0.339454919337488,0.499247197631871,0.51684371517304,0.47399154664516,0.411455931602199,0.240026323343986,0.098733899010558,0.493331352333881,0.793380723646885,0.855102247247898,0.359309788481514,0.56350577416149,0.695167461886305,0.30610…
ENSG00000004864,114.912321418813,114.641471112052,119.81983744414,110.816268363645,106.031810002013,114.900938677996,115.181816630548,108.317571828709,116.775187301254,110.415427399048,122.315563419808,125.371518337689,115.053548089002,108.898669897382,133.454635779256,124.503446652314,107.669567646869,91.3469714998891,84.4413469157299,97.2446277540325,86.5920539628156,92.4333011390894,103.464186…
ENSG00000004866,13.3698703321412,13.4132617023242,17.8508823177496,19.5004794802496,14.1720005792734,14.5193004329467,20.017352747759,18.8316824225076,18.118450113672,19.935261626547,16.9744047194836,17.1296774171636,17.664084971643,19.8596062986662,16.2875005126276,16.2910933367421,13.4021684050704,13.7399116231574,12.8977922293225,14.1157416903452,13.4537003581056,13.9992344048828,15.1693054342…
ENSG00000004897,118.614747049252,117.366039895337,103.119719552535,99.8540322179759,139.539698011307,129.733605307337,106.212292448492,101.167196172043,134.076530841173,133.590940528362,135.046366959421,129.137093976807,93.6607296170837,104.345224254318,109.211977121514,108.640200211284,130.198366070117,100.110222220171,94.9519787048187,122.498972887305,97.6978135952483,106.480478127551,130.91178…
ENSG00000004939,0.068563437600724,0.104791107049408,0.112269700111633,0.0723579943608521,0.172129561691579,0.208910797596356,0,0,0.142105491087623,0.0925786143647694,0,0,0.0631988728860214,0.0822911863204399,0.10286842429028,0.098733899010558,0.0822218920556468,0.216376560994605,0.391921863321953,0.0256649848915367,0.258273479824016,0.167799042524281,0.170059477962298,0.0942665704959114,0.0622584…
ENSG00000004948,4.11380625604344,2.61977767623519,1.79631520178612,1.26626490131491,2.40981386368211,2.61138496995445,1.31261329493502,1.76989496452139,2.16710873908625,2.68477981657831,2.24661238934342,2.73188820877178,2.74915097054193,3.62081219809935,2.571710607257,3.71897686273102,2.4666567616694,1.51463592696224,1.42517041207983,2.36117861002138,2.18358487487577,2.1094736774481,2.58490406502…
ENSG00000004961,33.8017747371569,28.660367778013,34.9720115847735,34.7680162903894,66.4420108129496,67.8960092188157,68.8028135428439,67.256008651813,71.9053784903373,68.384736477443,30.953326253176,30.7891184610225,75.8070480267827,80.5356410122705,24.1740797082158,26.9872657295525,67.4630624316582,69.4568760792683,66.2704241617121,60.4667044044605,67.8320075646893,62.2055021929297,65.4048752242…
ENSG00000004975,37.2985100547938,35.6813719503234,38.3120351630946,35.6724912199001,35.573442749593,37.3950327697477,28.8774924885704,32.3536799514511,34.1763706065734,38.1115295801634,38.566846017062,43.4887068909887,30.1774618030752,28.5001808623123,36.1068169258882,34.7543324517164,36.4654091266793,31.4467268645493,32.4938853954201,35.340684195646,32.8242113449068,32.4811003743429,35.916561745…
ENSG00000005001,1.64552250241738,0.890724409919966,0.224539400223265,0.289431977443408,0.860647808457896,1.14900938677996,0.984459971201264,0.849549582970269,0.42631647326287,0.462893071823847,0.249623598815935,0.443008898719749,1.23237802127742,1.70068451728909,0.857236869085666,0.427846895712418,0.369998514250411,0.43275312198921,1.14013632966386,0.487634712939197,0.633943995931676,0.5992822947…
ENSG00000005007,111.072768913173,102.014142712598,121.840692046149,109.007318504624,101.154805754085,112.498464505638,127.651642932431,120.848428177521,107.858067735506,119.673288835525,112.330619467171,107.946501654712,149.275737756783,133.064848280151,108.560477101009,110.614878191495,107.052903456452,137.326990711243,121.709553191617,96.551673161961,114.861260299917,118.729808231823,98.2263544…
ENSG00000005020,3.90811594324127,5.71111533419273,3.25582130323734,3.58172072086218,5.04913380961966,6.99851171947792,4.70353097351715,3.46899413046193,3.94342737768154,3.79572318895554,3.99397758105497,5.31610678463698,2.27515942389677,2.19443163521173,5.14342121451399,4.37720285613474,3.74109608853193,3.28171117508484,3.95484789352153,3.8497477337305,3.70974634656314,4.45866027278803,4.55759400…
ENSG00000005022,279.053191034947,281.206935767086,271.103258344565,240.662689244194,435.717297161951,437.145843970375,514.763180497017,504.561656485759,253.374090609232,253.819701050076,278.330312679768,257.831179054894,564.113139380627,590.905578571638,266.360639962298,250.257522692094,529.015653486031,553.960058906355,533.868836365104,493.845639282949,508.845714067825,475.182917136973,524.39540…
ENSG00000005059,13.6441240825441,10.4267151514161,15.268679215182,13.9650929116444,14.6883892643481,12.4301924569832,15.7513595392202,15.6458714863691,15.4184457830071,13.7016349259859,13.8541097342844,12.921092879326,14.5357407637849,15.9370597507252,11.1440792981137,12.736672972362,13.1555027289035,9.9893845659176,11.2944755157327,12.6015075817445,11.4109919267702,10.9548803476566,13.4346987590…
ENSG00000005073,0,0,0,0,0,0,0,0,0,0,0,0,0,0,0,0,0,0,0,0,0,0.0239712917891829,0,0,0,0,0,0,0,0,0,0,0,0,0,0,0,0,0,0,0,0,0,0,0,0
ENSG00000005075,22.4888075330375,22.3729013550486,25.7097613255639,24.3122861052463,26.1063168565562,24.1291971223791,23.0801171026074,25.0617126976229,27.7460971348584,30.5509427403739,24.9623598815935,25.3991768599323,27.4283108325333,25.2085334094947,25.957132395914,26.0986606384575,24.1732362643602,26.1455011201815,22.9452436344853,25.1003552239229,24.2072688816873,25.2657415457988,24.1484458…
ENSG00000005100,113.952433292403,110.921386811798,134.050021933289,128.435439990512,101.441688356904,105.813318982554,122.948111958913,119.078533212999,118.871243294797,115.322093960381,106.214841296181,105.805291977567,146.400189040469,142.610625893322,90.9356870726074,86.2605164355575,109.314005487982,119.223485108027,102.46975262854,97.9119173612125,99.7640014338404,104.682631243362,112.715421…
ENSG00000005102,0,0.366768874672927,0.112269700111633,0.108536991541278,0,0,0.109384441244585,0,0.0710527455438116,0,0,0,0.0315994364430107,0.137151977200733,0.0342894747634266,0,0.12333283808347,0.252439321160373,0,0.0513299697830734,0.0469588145134575,0.0719138753675488,0.0340118955924597,0.141399855743867,0.0311292428574341,0.0258032267089819,0.0332358382176444,0,0.133047038281458,0,0,0.039030…
ENSG00000005108,3.35960844243547,2.46259101566108,8.75703660870734,9.51507625845205,3.8442268777786,3.13366196394534,0.984459971201264,1.41591597161711,1.88289775691101,2.09844859226811,6.73983716803026,4.72542825301065,1.39037520349247,1.42638056288762,6.37784230599735,8.35947011622724,2.13776919344682,1.08188280497303,0.926360767851889,2.84881332296057,1.83139376602484,2.34918659533993,2.550892…
ENSG00000005156,152.759338974413,148.122229814338,140.196788014401,139.976540091068,142.580653601191,142.477163960715,140.012084793069,139.609314801448,145.76470748313,142.817942426718,81.0028578157711,77.6742269088626,140.901887099385,137.865167482177,73.4823444180233,74.5111824533011,150.383840569778,149.227701565946,134.500457640034,146.059429017735,141.275593463737,127.263588108772,150.196530…
ENSG00000005175,82.8931960592753,73.615752702209,82.6024318571337,85.9251183035118,81.7615418035001,75.8346195274772,82.475868698417,86.7248532615483,82.5277639491372,79.5250297393369,77.8825628305719,79.0770884214751,80.6733612390063,86.6800495908633,78.9686603801715,78.2630706157023,85.2229911156779,69.9256919614232,75.284627018117,82.3589365169413,72.880080124886,73.376124166689,89.51930919935…
ENSG00000005187,6.30783625926661,6.44465308353858,5.47314788044209,5.02888060807922,5.16388685074738,6.26732392789068,3.17214879609296,2.4070571517491,4.76053395143538,4.65979025636006,2.49623598815935,3.17489710749153,4.58191828423655,5.26663592450815,8.02373709464183,6.48352603502664,3.45331946633716,8.11412103729769,6.6983009367752,3.38777800568284,7.0203427697619,6.08870811445247,3.2311300812…
ENSG00000005189,3.49673531763692,4.66320426369865,4.93986680491183,4.84798562217709,5.96715813864141,5.64059153510161,3.50030211982672,3.82297312336621,5.47106140687349,5.30784055691344,4.99247197631871,5.53761123399686,3.72873350027526,3.34650824369789,4.73194751735287,6.25314693733534,3.08332095208675,5.15697470370476,4.77432088046743,5.33831685743963,5.32982544727743,4.79425835783659,3.7072966…
ENSG00000005194,50.8740706997372,48.5182825638758,57.2014122068768,51.6636079736484,55.1962127824331,54.2123519762544,50.0980740900199,51.3269539711204,62.5619424513261,64.1569797547852,32.0766324478477,29.1647524990501,26.0379356290408,28.3630288851116,31.3748694085354,26.723975332191,55.9519975438676,44.2850694835625,41.971268635751,48.4298264903297,42.1455360258281,39.5046888685735,50.88179580…
ENSG00000005206,13.918377832947,17.9192793054487,14.2863193392052,12.5541120216078,18.819498744946,17.026230004103,14.219977361796,15.4334840906266,19.6816105156358,23.021215438706,16.3503457224438,15.8744855374577,12.3869790856602,13.468324161112,17.1790268564767,17.0480532291563,16.6910440872963,13.4514095418313,14.5011089429123,17.4265247413534,14.6511501281987,13.9992344048828,13.978889088500…
ENSG00000005238,7.81623188648253,5.3443464595198,5.66961985563744,3.58172072086218,8.49172504345124,8.66979810024877,4.26599320853881,3.0442193389768,6.96316906329354,6.51136254365545,6.11577817099042,6.0544549491699,3.2547419536301,2.98991310297598,4.1147369716112,5.10125144887883,7.44108123103603,7.03223823232467,6.16386203224527,5.64629667613807,6.08116647949275,6.42430619950103,5.850046041903…
ENSG00000005243,0.205690312802172,0.104791107049408,0.0561348500558163,0,0.114753041127719,0.313366196394534,0.109384441244585,0,0.0710527455438116,0,0,0,0.0315994364430107,0.109721581760586,0.10286842429028,0.065822599340372,0,0.0360627601657675,0.106887780905987,0.179654894240757,0.093917629026915,0.0958851671567318,0.0340118955924597,0.0471332852479557,0,0.258032267089819,0.166179191088222,0.0…
ENSG00000005249,102.845156401086,97.9272895376716,101.604078601027,100.903223136208,67.8190473064822,67.2692768260266,78.2098754898782,74.1939969127368,68.9922159230411,66.1628497326885,120.568198228097,107.724997205352,87.8464333115697,91.3980776065685,109.246266596277,107.257925625136,108.327342783315,76.0563611896037,75.142109976909,92.1116307757252,73.3966270845341,84.6186600158158,103.192091…
ENSG00000005302,18.6492550273969,17.2381371096276,20.6576248205404,21.1647133505492,32.4177341185807,35.3059247937842,43.8631609390786,44.8845363002625,35.5263727719058,34.8095590011533,17.5984637165234,21.1167575056413,43.1016313082666,43.0657208410302,19.9907637870777,19.9771588998029,33.8343085808987,30.4730323400736,33.0995828205541,33.5954652230215,33.9747023004865,30.8270812408893,36.120633…
ENSG00000005339,147.342827403956,137.276350234724,181.455902805426,178.651888076944,171.268913883121,171.829131023003,186.500472322017,172.812544335869,167.009478400729,167.474713385868,212.554494391769,183.405684069976,213.80178697341,194.838098811361,150.565083686206,148.989453606932,154.988266524894,183.090633361602,146.899440225128,161.740734786464,145.267092697381,164.826602342422,167.338526…
ENSG00000005379,3.70242563043909,3.9820620678775,4.79952967977229,3.87115269830559,3.49996775439544,4.49158214832165,3.71907100231589,2.61944454749166,3.19737354947152,3.76486365083395,2.49623598815935,2.5842185758652,5.24550644953978,5.10205355186727,5.52060543691169,6.48352603502664,3.28887568222587,9.08781556177342,15.0355478474422,5.13299697830734,10.9883625961491,10.7870813051323,4.081427471…
ENSG00000005381,0.068563437600724,0.0523955535247039,0.0842022750837244,0.144715988721704,0.286882602819299,0.208910797596356,0.109384441244585,0.424774791485134,0.106579118315717,0.246876304972718,0,0.0738348164532914,0.347593800873118,0.685759886003665,0.0685789495268533,0.032911299670186,0.328887568222587,0.793380723646885,0.641326685435924,0.410639758264587,0.821779253985506,0.719138753675488…
ENSG00000005421,0.274253750402896,0.314373321148223,0.364876525362806,0.397968968984686,0.114753041127719,0.208910797596356,0.328153323733755,0.141591597161711,0.461842846034775,0.370314457459077,0.124811799407968,0.369174082266457,0.0947983093290321,0.109721581760586,0.171447373817133,0.394935596042232,0.452220406306057,0.252439321160373,0.213775561811974,0.436304743156124,0.117397036283644,0.14…
ENSG00000005436,27.4253750402896,23.3160213184932,30.6215607054478,32.8143504426464,31.0406976250481,28.6207792707008,26.2522658987004,24.070571517491,36.3079529728877,33.4825988619249,23.7142418875139,21.4859315879078,25.7219412646107,25.9491540863787,21.9795533233565,21.589812583642,22.117688962969,19.4738904895145,20.8431172766675,21.9948920520469,21.4132194181366,22.1974161967834,22.141744030…
ENSG00000005448,13.7812509577455,14.0420083446206,16.1668368160751,12.6264700159687,13.08184668856,14.2059342365522,10.8290596832139,10.2653907942241,14.4592337181657,16.7875887381448,14.8526041295482,11.7397358160733,8.87944164048601,9.54577761317102,17.6590795031647,17.3113436265178,10.7710678592897,15.7954889526062,12.6840166675105,9.90668416813316,12.7962769549172,12.4411004385859,8.979140436…
ENSG00000005469,7.33628782327747,8.64526633157614,5.27667590524673,5.06505960525964,7.63107723499334,9.40098589183602,5.35983762098466,5.45127649072589,6.21711523508352,5.7398740906157,5.86615457217448,4.50392380365078,3.63393519094623,2.8253307303351,7.26936864984645,7.24048592744092,8.42774393570379,4.43571950038941,4.48928679805146,10.1889990019401,5.91681062869564,5.17779902646352,8.060819255…
ENSG00000005471,0.959888126410136,1.20509773106819,1.79631520178612,1.6642338702996,1.20490693184105,1.56683098197267,0.43753776497834,0.49557059006599,1.31447579256051,1.11094337237723,1.12330619467171,0.812182980986206,1.07438083906236,0.987494235845278,1.88592111198846,1.97467798021116,0.739997028500821,1.69494972779107,1.14013632966386,1.10359435033608,1.90183198779503,1.67799042524281,0.9863…
ENSG00000005483,72.2658632311631,74.139708237456,45.1043520198484,49.8546581146271,98.6302388492749,96.2034222931219,60.8177493319892,62.3710985497339,99.9001602345991,95.3251132575909,99.9742513257821,97.9049666170644,58.3009602373547,56.3694626295013,80.3059498959452,87.050387627642,89.4163076105159,51.3894332362187,46.4605554338025,93.9338447030243,55.4114011258798,57.8187557955093,89.45128540…
ENSG00000005486,9.94169845210498,10.1647373837926,12.4619367123912,12.8797229962317,9.63925545472843,10.6544506774142,6.67245091591968,8.84947482260697,13.3934425350085,12.6215510917302,9.73532035382148,10.3368743034608,6.06709179705805,6.50100371931475,13.2700267334461,13.8885684608185,8.9621862340655,11.6122087733771,9.65552954184085,7.75082543724408,9.67351578977224,9.30086121420298,8.40093821…
ENSG00000005513,16.3180981489723,18.1812570730723,15.7458254406565,14.5439568665313,4.01635643947018,5.32722533870708,4.15660876729423,3.89376892194707,4.51184934203204,5.4312787093998,8.73682595855774,5.24227196818369,7.99465742008171,8.25654902748413,6.3092633564705,6.97719553007943,8.18107825953686,11.5400832530456,11.4726218172426,5.49230676678885,10.471815636501,10.4035406365054,6.6663315361…
ENSG00000005700,110.729951725169,122.710386354857,76.0627218256311,76.8803690084053,108.212117783439,104.455398798178,73.8344978400948,72.7780809411197,100.681740435581,103.934924393514,129.429835986063,108.758684635698,81.9689381331698,77.6005887001748,97.6907136010025,96.9566888283679,117.330639963408,93.1140467480117,90.5695796876732,102.37762473234,93.401082067267,95.8132532813642,114.7901476…
ENSG00000005801,114.089560167605,113.069604506311,93.6609973181295,107.596337614587,101.154805754085,95.2633237039383,131.917636140969,132.742122339105,110.096229220136,102.607964254286,103.094546310981,106.838979407913,130.000081526546,128.840567382369,103.005582189334,108.113619416561,109.190672649899,129.825936596763,130.403092705304,120.137794277283,125.943540525093,126.856076148356,111.38895…
ENSG00000005810,105.519130467514,107.830049153841,102.867112727283,106.14917772737,125.02343830865,131.927168682099,88.7107818493584,89.0611146147165,121.962037725953,117.482261628892,185.220710321424,143.091874286479,129.873683780774,115.811129548299,99.1308715410664,106.533877032392,126.621713765696,120.774183795155,91.6384574967331,141.696381586174,99.8579190628674,114.918372837343,146.6592937…
ENSG00000005812,19.4034528410049,21.5345724986533,34.522932784327,35.0936272650133,25.762057733173,22.7712769380028,29.0962613710596,27.5395656479529,27.8526762531741,25.6134166409195,22.3413120940262,27.3927169041711,38.298516968929,41.9685050234243,26.3686060930751,25.6708137427451,29.1887716797546,30.0402792180843,34.7741580547479,24.4587306016345,29.5370943289648,30.6832534901542,29.250230209…
ENSG00000005844,0.34281718800362,0.26197776762352,0.0842022750837244,0.18089498590213,0.459012164510878,0.626732392789068,0.43753776497834,0.0707957985808557,0.568421964350493,0.246876304972718,0,0.147669632906583,0.410792673759139,0.219443163521173,0.342894747634266,0.526580794722976,0.452220406306057,0.793380723646885,0.855102247247898,0.333644803589977,0.657423403188405,0.623253586518756,0.238…
ENSG00000005882,8.15904907448615,11.1078573472372,12.6022738375308,13.4947659482989,8.95073720796212,8.77425349904695,7.32875756338719,6.23003027511531,6.96316906329354,8.82582790277468,8.73682595855774,7.16197719596927,6.85707770813332,7.95481467764252,9.05242133754463,10.2354141974278,8.92107528803768,10.2057611269122,9.61990028153885,9.88101918324163,9.97874808410972,8.70157891947341,7.7887240…
ENSG00000005884,21.8717365946309,22.6348791226721,22.0329286469079,19.5366584774301,28.5735072408021,34.052460008206,19.0328927765578,17.6281538466331,20.9250335626525,19.1637731735073,26.959348672121,21.4120967714545,18.4856703191613,17.582883477134,27.1229745378705,25.2100555473625,16.4032674651015,18.2838194040441,16.817010862542,13.3201271587075,16.8347350030745,16.1806219576985,15.3393649121…
ENSG00000005889,42.4407678748481,42.0736294803372,59.1380645338025,63.8921090206324,89.8516312030043,76.9836289142572,124.698263018827,132.671326540524,92.3330428341832,96.7137924730624,102.844922712165,97.0927836360782,154.39484646055,152.485568251775,79.0372393296984,81.751668380742,82.1396701635911,120.161116872337,115.011252254842,78.8684985716923,108.967929078478,116.716219721532,79.89394274…
ENSG00000005893,62.0499110286552,69.0573395455597,65.8461791154725,56.981920559171,131.047972967856,115.841037267179,84.0072508758412,77.8045826403605,65.4751050186224,61.009306866383,72.6404672554372,72.2842853077723,141.186282027372,145.518247809978,73.8252391656575,75.8934570394489,149.520510703194,152.184847899539,144.904201648217,142.46633113292,155.03452611618,140.83133926145,140.5371525880…
ENSG00000005961,3.90811594324127,2.77696433680931,3.53649555351643,2.6410667941711,2.75407298706527,2.8202957675508,2.1876888248917,1.91148656168311,2.48684609403341,2.19102720663287,1.74736519171155,3.02722747458495,2.02236393235268,1.78297570360953,4.04615802208434,4.44302545547511,1.89110351727988,3.17352289458754,3.59855529050157,3.18245812655055,3.2636376086853,2.90052630649114,1.29245203251…
ENSG00000005981,0,0,0,0,0,0,0,0,0,0,0,0.221504449359874,0,0,0.10286842429028,0,0,0,0,0.0256649848915367,0,0.0479425835783659,0,0,0.0311292428574341,0,0.166179191088222,0.0584478028681856,0.0997852787110935,0.153303906137537,0,0,0,0,0.0332588258031416,0,0.0719169957049013,0,0,0.0414970096009971,0,0,0,0,0,0.163876335202926
ENSG00000006007,62.5298550918603,60.6216554280824,48.0233642227508,41.7505627462116,67.7616707859183,62.5687838801086,61.145902655723,58.406533829206,67.500108266621,66.2245688089317,68.0224306773424,65.9344910927892,59.2173438942021,59.7982620595196,55.8918438643854,50.4201110947249,56.3631070041459,53.8417009274909,47.1731406398424,51.0219899643749,51.8190518156003,54.5346888203912,56.187651518…
ENSG00000006015,7.67910501128109,8.38328856395263,12.4900041374191,10.5642671766844,10.0408910986755,10.3410844810196,9.95398415325723,9.41584121125381,11.5815975236413,12.4363938630007,9.23607315618961,10.9275528350871,9.73262642444729,8.39370100468486,11.9670266924359,9.84047860138561,8.18107825953686,10.1696983667464,10.7244073509007,11.1386034429269,10.824006745352,10.4994258036621,8.06081925…
ENSG00000006016,17.6208034633861,20.696243642258,8.70090175865152,8.21263235995671,7.11468854991861,5.32722533870708,9.29767750578972,8.92027062118782,7.10527455438116,8.42465390719401,10.3593793508613,10.2630394870075,10.9966038821677,13.0568682295098,5.58918438643854,5.72656614261236,13.0732808368478,10.6385142489014,11.4013632966386,9.98367912280777,9.81439223331262,9.08511958810033,12.2102705…
ENSG00000006025,4.79944063205068,3.77247985377868,2.66640537765127,2.67724579135153,3.15570863101228,4.07376055312894,6.01614426845217,3.61058572762364,3.73026914105011,4.10431857017144,2.12180058993545,4.2824193542909,3.66553462738924,3.31907784825774,4.52621066877231,3.81771076174158,3.49443041236499,2.52439321160373,3.70544307140756,4.0550676128628,3.52191108850931,3.04435405722623,3.605260932…
ENSG00000006042,38.258398181204,37.7247985377868,57.1733447818489,46.3814743853062,42.7455078200755,43.8712674952347,47.691616382639,50.9021791796353,40.2158539777974,42.0306909216053,49.4254725655552,42.8980283593623,72.8998998740257,68.7405709730074,48.6910541640658,48.5770783131945,52.4986780775305,66.5718552660068,61.1398106782247,49.1997760370758,57.0549596338509,57.3393299597256,48.19485605…
ENSG00000006047,15.906717523368,15.03752386159,18.2157588431124,16.2443697340113,18.7047457038183,16.8173192065067,18.0484328053565,19.3980488111545,19.7171368884077,18.8551777922914,9.86013215322945,12.1089098983398,9.4482314964602,11.8499308301433,21.1566059290342,24.420184355278,15.5399375985172,22.178597501947,24.797965170189,21.0709525959516,24.9586099139027,23.3000956190858,13.9448771929085…
ENSG00000006059,0,0,0,0,0,0,0,0,0,0,0,0,0,0,0,0,0,0,0,0,0,0,0,0,0,0,0,0,0,0,0,0,0,0,0,0,0,0,0,0,0,0,0,0,0,0
ENSG00000006062,7.61054157368036,7.17819083288444,48.893454398616,42.9444696531657,5.10651033018352,6.05841313029432,22.9707326613628,21.3803311714184,4.61842846034775,6.48050300553386,3.99397758105497,4.13474972138432,24.6159609891053,18.7898208765004,9.73821083281316,8.65567181325892,8.05774542145338,56.8709727814154,49.8097059021901,5.80028658548729,43.8595327555693,39.4807175767843,7.17650997…
ENSG00000006071,1.16557843921231,1.57186660574112,1.29110155128377,1.19390690695406,0.745894767330176,1.56683098197267,1.09384441244585,1.34512017303626,1.45658128364814,1.72813413480903,0.873682595855774,1.32902669615925,0.44239211020215,0.438886327042346,1.81734216246161,2.92910567064655,0.657775136445174,1.11794556513879,1.24702411056985,1.61689404816681,0.986135104782607,1.1266507140916,0.578…
ENSG00000006116,0.068563437600724,0,0.0280674250279081,0.036178997180426,0.114753041127719,0,0,0.141591597161711,0,0.0308595381215898,0,0,0.0947983093290321,0,0,0.230379097691302,0,0.072125520331535,0.0712585206039915,0,0.0234794072567287,0.0479425835783659,0,0.188533140991823,0.124516971429737,0.129016133544909,0,0.0292239014340928,0.0997852787110935,0,0.072435497276208,0,0.041781044015536,0,0.0…
ENSG00000006118,25.8484159754729,26.5645456370249,31.463583456285,28.0749018120106,24.958786445279,28.9341454670953,29.7525680185271,29.2386648138934,23.7316170116331,24.9962258784877,21.5924412975784,26.8758731889981,20.602832560843,22.630076238121,28.8374482760418,29.6530810028376,21.6654685566629,17.0216227982423,15.8906500946901,22.1232169765046,18.7365669908695,18.0503827172548,18.7065425758…
ENSG00000006125,346.108233008455,356.708928396184,294.764097643091,292.94134016991,364.05402297769,367.891914567183,291.509535916819,285.236272482268,334.587378765809,327.141963626973,408.259395863462,355.293136773238,309.137286721974,296.001397194622,319.337878471792,316.73834802587,357.500786657952,313.565699641349,282.397517153618,301.589237460448,296.897104761335,308.965979870779,345.25475215…
ENSG00000006128,0.34281718800362,0.419164428197631,0.842022750837244,0.976832923871503,0.459012164510878,0.313366196394534,1.09384441244585,0.778753784389413,0.994738437613363,0.925786143647694,1.12330619467171,0.443008898719749,0.821585347518278,0.548607908802932,1.78305268769818,1.94176668054097,0.657775136445174,1.58676144729377,1.24702411056985,0.718619576963027,1.66703791522774,1.22253588124…
ENSG00000006194,38.8754691196105,38.3535451800833,38.8453162386249,39.8692548928295,38.3848922572222,37.7083989661422,45.8320808814811,45.5216984874902,37.4447969015887,40.6420117061338,39.6901522117337,40.3138097834971,45.7559839694795,47.3174321342529,34.9752642586952,42.291020076189,51.7997919950575,69.6732526402629,63.5982296390624,40.3453562494957,56.6792891177432,56.7160763732068,46.6983326…
ENSG00000006210,0.891324688809412,0.890724409919966,24.6993340245592,21.8882932941578,2.92620254875685,2.40247417235809,2.07830438364711,1.34512017303626,2.09605599354244,2.03672951602493,1.37292979348764,0.812182980986206,6.35148672504515,5.56837027434976,1.44015794006392,1.61265368383911,1.27443932686253,12.5137777775213,11.2232169951287,1.28324924457683,9.01609238658384,9.2768899224138,1.39448…
ENSG00000006282,10.4902059529108,10.2171329373173,13.2478246131726,13.9650929116444,12.3933284417937,14.8326666293413,11.4853663306814,9.06186221834954,13.8552853810433,17.4973581149414,15.9759103242199,14.8407981071116,9.57462924223224,8.9423089134878,14.9159215220906,16.0278029393806,7.19441555486909,7.57317963481118,8.94294433580093,7.34018567897949,9.53263934623187,9.32483250599216,6.97243859…
ENSG00000006283,7.61054157368036,7.70214636813147,9.00964343395851,8.06791637123501,4.30323904228948,3.96930515433076,3.6096865610713,4.03536051910878,4.76053395143538,4.93752609945437,5.99096637158245,5.38994160109027,4.51871941135053,4.85517999290595,5.17771068927742,6.3518808363459,4.64553690114404,8.69112519994997,7.23273984130514,7.05787084517259,6.01072825772256,6.64004782560367,5.373879503…
ENSG00000006327,15.15251970976,15.3518971827382,88.7772653632734,78.7616768617875,15.6064135933698,16.3994976113139,33.0341012558646,35.5394908875896,17.6566072676372,18.9786159447777,13.6044861354685,14.176284759032,56.8789855974193,55.1625252301348,17.0761584321865,18.0024809195917,14.1421654335712,78.6168171613732,75.142109976909,16.1689404816681,64.8501228430848,63.811578742805,16.49576936234…
ENSG00000006377,0.068563437600724,0,0.0842022750837244,0,0,0,0.109384441244585,0,0,0,0,0.0738348164532914,0.0315994364430107,0.109721581760586,0.30860527287084,0.065822599340372,0,0.0360627601657675,0.106887780905987,0,0.093917629026915,0.0479425835783659,0.0680237911849193,0,0,0.0258032267089819,0.132943352870578,0.116895605736371,0.0997852787110935,0.0306607812275074,0.036217748638104,0,0,0.033…
ENSG00000006432,67.0550419735081,66.4899574228493,72.4981588470867,68.6315576512682,79.2369748986903,76.5658073190644,58.3019071833638,59.1852876135954,75.813279495247,77.7043169901631,73.2645262524771,70.8814237951598,72.0783145265074,66.0249618244329,67.6188442334773,67.6656321219024,59.816426470483,65.3457214203708,53.1588563705777,63.6234975461195,56.5618920814596,57.7708132119309,58.87459127…
ENSG00000006451,137.949636452657,137.695514662922,133.376403732619,126.590311134311,130.933219926728,120.437074814299,120.432269810288,116.67147606125,124.51993656553,128.190521357084,140.912521531596,137.628097868935,134.645198683669,140.22418149003,142.267030793457,140.333781793673,138.913886628015,124.236208771069,121.103855766484,129.582508717369,131.249886565114,126.44856418794,140.877271543…
ENSG00000006453,57.867541335011,60.3072821069342,51.7563317514626,47.1774123232755,64.9502212782892,67.0603660284303,44.0819298215677,48.3535304307245,55.1014041692259,56.349516610023,41.1878938046293,45.9990906504006,43.6072222913548,45.9459123622456,57.9149228754276,58.8454038102926,62.4064160702359,59.4674915133506,57.6125139083271,65.5227064280932,58.510682883768,55.4455979083801,58.466448523…
ENSG00000006459,40.4524281844271,43.7502871931278,41.1468450909133,41.5696677603095,37.6963740104558,36.2460233829677,24.3927303975424,26.47762866924,34.3540024704329,32.8654080994931,47.9277309726596,43.2672024416288,31.5362375701247,30.3654477522423,44.0962645457666,45.6150613428778,38.2331798058758,41.0033583084777,36.8762844125656,37.1115681531621,38.5297073082919,41.3265070445514,39.62385836…
ENSG00000006468,99.6226748338519,99.5515516969374,70.280832269882,67.3652927499533,91.630303340484,95.4722345015347,76.7878777536986,77.3798078488753,113.577813751783,115.754127494083,74.1382088483328,76.1975305797968,80.1361708194751,86.5977584045429,73.6880812666038,75.4656101437365,52.5808999695861,53.985951968154,45.4273068850446,64.5731019871063,57.6184654080123,56.6681337896285,57.173996490…
ENSG00000006530,33.047576923549,36.4149096996692,32.0249319568432,32.5972764595639,33.3357584476025,35.0970139961878,30.7370279897284,31.5749261670617,33.1461057961881,33.5134584000465,39.6901522117337,34.702363733047,30.9358482777075,28.993927980235,32.8836062981261,34.9847115494077,25.8176741054731,26.830693563331,26.3656526234769,27.3845388792697,27.870056413737,27.6628707247171,27.37957595193…
ENSG00000006534,1.30270531441376,1.46707549869171,0.589415925586071,0.868295932330225,1.09015389071333,1.35792018437631,1.4219977361796,1.41591597161711,0.959212064841457,0.925786143647694,0.873682595855774,1.03368743034608,0.91638365684731,0.822911863204398,1.6801842634079,1.67847628317949,1.80888162522423,0.901569004144188,1.42517041207983,1.64255903305835,0.962655697525879,1.22253588124833,1.3…
ENSG00000006555,0.822761251208688,1.51947105221641,1.12269700111633,1.04919091823235,1.49178953466035,0.417821595192712,0.984459971201264,0.778753784389413,0.888159319297645,1.04922429613405,0.249623598815935,0.959852613892789,1.01118196617634,0.768051072324105,0.857236869085666,1.44809718548818,1.27443932686253,1.73101248795684,1.92398005630777,1.2575842596853,1.47920265717391,1.46224879914016,1…
ENSG00000006576,46.4174472556901,43.1215405508313,36.7683267865597,40.9184458110618,49.6880668083025,51.7054224050981,33.5810234620876,38.0881396365004,55.7764052518921,56.4420952243877,66.5246890844468,55.3022775235153,38.7409090791311,42.846277677509,47.7309488706899,48.0504975184716,48.880914827082,39.092032019692,39.3703326337053,50.5343552514357,44.6578326022981,45.6892821501827,52.072212152…
ENSG00000006606,1.09701500161158,1.3622843916423,1.31916897631168,1.12154891259321,2.58194342537369,2.50692957115627,2.40645770738087,3.0442193389768,2.84210982175246,2.56134166409195,0.499247197631871,1.25519187970595,0.947983093290321,0.932633444964985,2.12594743533245,2.04050057955153,3.45331946633716,3.93084085806866,2.99285786536764,3.49043794524899,3.63930812479296,2.58889951323176,4.251486…
ENSG00000006607,39.5611034956177,42.3880028014855,39.1821253389598,39.4712859238448,39.5897991890632,33.8435492106097,34.3467145507997,30.7961723826722,33.7855805060824,34.4701040818158,40.4390230081815,34.6285289165937,49.2319219782107,44.90355733552,35.0095537334586,33.2075013672177,19.6099212552718,20.5918360546533,22.8027265932773,23.1754813570576,25.3342804300103,25.7211960897933,21.46150611…
ENSG00000006611,0.754197813607964,0.785933302870559,0.813955325809336,0.506505960525964,0.745894767330176,0.731187791587246,0.21876888248917,0.141591597161711,0.319737354947152,0.216016766851129,0.624058997039839,0.738348164532914,0.568789855974193,0.192012768081026,1.09726319242965,1.38227458614781,0.698886082472998,0.865506243978421,1.17576558996586,1.23191927479376,0.75134103221532,0.599282294…
ENSG00000006625,96.125939516215,95.5170940755352,83.107645507636,90.1218819764412,100.925299671829,104.246488000582,85.7574019357546,93.5212499253104,86.755402308994,76.0996210078404,73.6389616507009,77.2312180101428,93.6923290535267,95.978953645073,94.6046608722941,89.1237995068637,92.3351847784913,88.6062017272908,86.5434732735477,90.7257215915822,90.7009502327432,87.2075595290475,92.1722370555…
ENSG00000006634,85.9099873137071,81.8942501591122,76.0065869755752,75.2161351381057,92.6057041900696,91.7118401448002,100.633685945018,92.3177213494359,102.70674368358,99.830605823343,102.470487313941,104.033256382688,97.1050681893719,92.3307110515335,86.0665816562008,87.4453232236842,81.8930044874242,62.6049516477724,61.2466984591307,77.3029344933085,66.7284754236231,71.5543059907111,84.28147727…
ENSG00000006638,0.548507500805792,0.733537749345855,0.44907880044653,0.904474929510651,1.03277737014947,0.52227699399089,0.328153323733755,0.0707957985808557,0.319737354947152,0.524612148067026,0.124811799407968,0.51684371517304,0.315994364430107,0.329164745281759,0.41147369716112,0.592403394063348,0.575553244389527,0.829443483812653,0.676955945737919,0.641624622288417,0.516546959648032,0.5273684…
ENSG00000006652,28.7280803547033,27.8744344751425,49.5670725992858,44.4278085375632,41.0815887237236,36.7683003769586,53.5983762098466,60.3180203908891,52.3658734657892,48.3260366984096,50.7984023590429,45.7775862010407,47.241157482301,40.2129597152549,75.8483181766997,70.8580281899104,44.0709341418267,58.3856087083776,57.8975479907431,48.5581514147874,61.0699382747515,54.3908610696561,45.2018092…
ENSG00000006659,0.205690312802172,0,0,0.036178997180426,0,0,0,0,0,0,0,0,0,0,0,0.16455649835093,0.12333283808347,0.072125520331535,0,0.15398990934922,0,0.0719138753675488,0,0,0,0.129016133544909,0,0,0,0,0,0,0,0,0,0,0.107875493557352,0.124893980622199,0,0,0,0.053935611451307,0,0.23886114065558,0.0542508821193433,0.163876335202926
ENSG00000006695,27.7681922282932,27.4028744934201,23.8011764236661,22.0691882800599,25.8194342537369,28.5163238719026,28.6587236060812,26.47762866924,29.3447839095942,26.7552195514183,32.9503150437035,30.2722747458495,24.6159609891053,26.5526227860619,25.6142376482797,25.9011928404364,24.8310114008053,20.1230201724983,20.8431172766675,20.5319879132294,20.1922902407867,23.5637798287668,23.57024364…
ENSG00000006704,29.550841605912,30.1798388302294,24.8396711496987,27.5322168543042,31.5570863101228,38.9618637517204,18.4859705703349,20.2475983941247,27.0710960521922,26.9403767801479,33.9488094389672,30.0507702964896,23.699577332258,23.9193048238078,35.9353695520711,36.8277443309381,26.7221149180852,28.5977688114536,28.0402278576707,28.4624682447142,25.6160333170911,24.2110047070748,26.42724287…
ENSG00000006712,35.03591661397,29.7082788485071,36.5718548113643,33.2484984088115,30.0079202548986,34.4702816033987,33.5810234620876,31.9289051599659,32.4711047135219,34.5935422343022,29.3307728608724,31.6013014420087,32.515820099858,31.8741195014504,28.5974219526978,29.1594115077848,28.0376651909756,25.748810758358,21.5557024827074,29.8997073986402,26.3204155347929,25.4335405883231,33.1275863070…
ENSG00000006715,60.7472057142414,58.4210421800449,71.2351247208309,73.2624692903627,63.7453143464482,62.4643284813104,60.7083648907446,61.5215489667636,72.3316949636002,70.2980278409815,69.644984069646,70.43841489644,58.6801534746709,63.4739350484993,60.5895019069749,63.1567840670869,66.1886231047957,42.662245276103,45.7123409674605,61.878278573495,47.4518820658488,50.0760285476032,66.52726777885…
ENSG00000006740,26.8083041018831,24.6783057101355,19.0577815939496,19.3195844943475,24.0981386368211,26.427215895939,17.7202794816228,16.7786042636628,22.0618774913535,23.7927038917457,27.208972270937,26.5066991067316,18.2328748276172,18.1314913859369,25.0656060520649,24.7163860523097,22.1999108550246,22.8637899450966,19.7386102073056,24.7667104203329,20.9671106802588,20.1119138111245,22.61791056…
ENSG00000006744,97.1543910802259,88.4960899032249,91.2471987657294,88.7832590807655,95.2450241360071,103.724211006591,93.9612350290984,100.813217179139,111.446231385469,109.798236636616,102.345675514534,103.959421566234,93.8187267992988,95.7320800861117,90.3870554763926,84.9769757484202,99.858487901583,90.5535907762423,80.9496794061344,86.7989789031771,80.9569962212007,85.0261719762319,97.9542593…
ENSG00000006747,1.16557843921231,1.62426215926582,1.06656215106051,1.01301192105193,1.31965997296877,1.35792018437631,1.4219977361796,1.2743243744554,1.17237030147289,0.709769376796565,1.49774159289561,1.10752224679937,0.853184783961289,1.2343677948066,3.42894747634266,2.86328307130618,0.863329866584291,1.04582004480726,0.463180383925945,0.744284561854564,0.704382217701862,1.03076554693487,0.8843…
ENSG00000006756,3.83955250564054,3.72008430025398,5.47314788044209,6.00571353195072,7.57370071442948,6.89405632067974,8.64137085832221,10.1237991970624,8.38422397416977,7.09769376796565,8.4872023597418,7.97416017695547,9.57462924223224,10.5607022444564,7.475105498427,9.51136560468375,5.0977573074501,11.323706692051,11.1519584745247,6.8525509660403,10.7066097090683,9.44468896493808,4.1154393666876…
ENSG00000006757,6.17070938406516,4.82039092427276,8.67283433362362,9.26182327818906,16.1228022784446,17.6529623968921,13.4542862730839,12.8848353417157,18.7223984507944,17.3430604243335,10.1097557520454,8.26949944276864,16.2421103317075,13.6329065337529,8.70952658991036,8.75440571226947,12.6210604305418,14.2447902654782,15.5343574916701,14.8600262521997,16.1303527853727,14.0471769884612,13.740805…
ENSG00000006788,0,0.104791107049408,0.0280674250279081,0,0,0,0,0,0,0,0,0,0.0315994364430107,0.0274303954401466,0,0,0,0.0360627601657675,0.142517041207983,0.0513299697830734,0.0704382217701862,0.0239712917891829,0,0,0.0311292428574341,0.0774096801269457,0,0,0.0332617595703645,0,0,0,0,0.0674039921969094,0,0.0343258480672745,0,0,0,0.0414970096009971,0,0.107871222902614,0,0,0,0
ENSG00000006831,82.207561683268,82.4182056943592,108.059586357446,98.5515883194805,67.9338003476099,71.7608589743483,95.4926172065226,85.3089372899312,76.3461750868256,72.0878810520338,88.1171303820252,84.7623692883786,101.086597181191,101.492463128542,77.2541866420002,81.225087586019,83.9074408427875,70.6108844045728,67.374931231074,70.9380182402074,60.8351442021842,68.9654064774793,80.166037911…
ENSG00000006837,0.68563437600724,1.15270217754349,0.533281075530255,0.434147966165112,0.745894767330176,1.25346478557814,0.765691088712094,0.566366388646846,1.06579118315717,1.08008383425564,1.37292979348764,0.443008898719749,0.47399154664516,0.438886327042346,1.23442109148336,1.05316158944595,0.781107974528644,0.757317963481118,1.92398005630777,1.69388900284142,1.22092917734989,1.10267942230242,…
ENSG00000007001,0,0,0,0,0,0,0,0,0.0710527455438116,0.0308595381215898,0,0,0.0947983093290321,0.0548607908802932,0.0342894747634266,0,0,0.072125520331535,0.142517041207983,0.0256649848915367,0.0469588145134575,0.0958851671567318,0.0340118955924597,0.141399855743867,0.0933877285723024,0.0516064534179638,0.265886705741155,0.0876717043022785,0.0332617595703645,0.0306607812275074,0.036217748638104,0.0…
ENSG00000007038,0.617070938406516,1.83384437336464,0.617483350613979,0.651221949247669,0.172129561691579,0.104455398798178,1.20322885369043,1.48671177019797,0.213158236631435,0.123438152486359,0.249623598815935,0,0.537190419531182,0.384025536162053,0.10286842429028,0.16455649835093,1.68554878714076,1.83920076845414,2.10212635781775,1.28324924457683,1.69051732248447,1.53416267450771,0.680237911849…
ENSG00000007047,38.9440325572112,44.7458027100971,31.6881228565083,30.4265366287383,41.5979774087983,40.1108731385003,17.7202794816228,18.3361118324416,26.396094969526,28.4833536862274,41.1878938046293,33.3733370368877,23.0991880398408,23.3432665195648,40.2215538974994,40.6125437930095,29.7643249241441,32.8531745110142,30.1423542154884,31.4396064921324,33.2233612682712,31.1626793259378,26.9034094…
ENSG00000007062,56.0163285197915,55.8536600573344,127.790986152066,122.719158436005,70.1714846496004,67.0603660284303,79.5224887848132,72.636489343958,59.7553590023456,59.6823467271547,88.3667539808411,84.3193603896588,99.7910202870278,98.968866748049,67.275949485843,65.9871558387229,33.6698647967874,46.8815882154978,45.3560483644406,35.6486640143445,50.5042050092235,54.8223443218614,33.331657680…
ENSG00000007080,34.9673531763692,32.3280565247423,31.2109766310339,27.7854698345672,39.1881635451162,37.7083989661422,29.0962613710596,23.9289799203292,32.7908420684691,37.8646532751907,32.8255032442955,34.702363733047,31.3150415150236,33.492512832419,25.957132395914,26.1973945374681,29.9287687082554,33.9350573159872,31.5318953672662,28.8474430180872,32.4485408287991,31.3304783684621,28.604004193…
ENSG00000007129,0,0,0.0280674250279081,0,0,0,0,0,0,0,0,0,0.0631988728860214,0.137151977200733,0,0,0.12333283808347,0.0360627601657675,0,0,0.0704382217701862,0.0239712917891829,0,0,0.0311292428574341,0.0516064534179638,0.0997075146529333,0.0584478028681856,0.066523519140729,0.0306607812275074,0.036217748638104,0,0,0,0.0665176516062832,0.0686516961345491,0.0719169957049013,0.0312234951555498,0.7647…
ENSG00000007168,185.738352460361,169.447220098892,211.516115010316,203.398322148355,206.32596794764,195.644961948987,200.829834125058,199.431764602271,206.656910414176,195.340876309663,215.300353978744,211.610583955133,211.179033748641,211.104323307368,197.438795687811,197.401975421776,204.691400272533,175.228951645464,160.937368784115,197.004424027436,173.865010736076,180.791482674018,204.513528…
ENSG00000007171,2.12546656562244,2.30540435508697,2.44186597742801,2.42399281108854,3.15570863101228,2.50692957115627,1.85953550115794,1.91148656168311,2.87763619452437,2.16016766851129,1.99698879052748,2.06737486069216,1.70636956792258,1.50867174920806,3.39465800157924,3.02783956965711,2.67221149180852,1.15400832530456,1.49642893268382,1.95053885175679,1.69051732248447,1.31842104840506,1.7346066…
ENSG00000007174,0.137126875201448,0.26197776762352,0.954292450948877,0.795937937969373,0.631141726202457,0.417821595192712,0.546922206222925,0.707957985808557,0.355263727719058,0.462893071823847,0.124811799407968,0.147669632906583,0.410792673759139,0.877772654084692,0.445763171924546,0.427846895712418,0.822218920556468,0.540941402486513,0.605697425133928,0.410639758264587,0.540026366904761,0.4554…
ENSG00000007202,213.506544688654,215.08374721891,172.305922246328,169.462422793116,201.047328055764,214.864755327852,195.579380945318,191.856614154119,212.056919075506,219.627332811355,260.232601765613,229.183270271017,186.626271632421,186.362106620356,167.778400017447,179.958986596577,196.181434444773,162.82336214844,142.018231563755,177.524700494759,150.761273995455,163.604066461174,189.9904487…
ENSG00000007216,0,0,0,0,0.114753041127719,0,0,0,0,0.0308595381215898,0,0,0,0,0,0,0,0,0,0,0,0,0,0,0,0,0,0,0,0,0,0,0,0,0.0665176516062832,0,0,0,0.117647328720342,0.248982057605983,0,0,0.102126675681729,0.143316684393348,0,0
ENSG00000007237,25.9169794130737,27.1408967257966,15.2967466402099,15.7378637734853,19.5080169917123,22.7712769380028,36.096865610713,36.318244671979,14.2816018543061,13.6707753878643,15.35185132718,13.6594410438589,43.6704211642408,39.0334527113286,24.2083691829792,24.5847408536289,33.9987523650099,43.2031866785895,35.9855529050157,28.6164581540634,37.7783662760766,34.6385166353693,35.9165617456…
ENSG00000007255,7.06203407287457,7.49256415403266,9.09384570904224,7.81466339097202,5.73765205638597,7.31187791587246,3.71907100231589,3.6813815262045,6.25264160785542,7.19027238233042,9.23607315618961,7.82649054404889,5.43510306819784,5.34892711082859,8.16089499369554,7.9974458198552,5.46775582170051,11.1073301310564,8.90731507549894,5.95427649483651,8.71086009224637,8.2940669590573,5.4419032947…
ENSG00000007264,11.5872209545224,12.6797239529783,11.3953745613307,8.42970634303927,11.2457980305165,9.40098589183602,7.54752644587636,7.92912944105584,10.4447535949403,11.4180291049882,6.73983716803026,9.74619577183447,6.82547827169031,5.89753501963152,9.0181318627812,9.67592210303468,5.75553244389527,7.35680307381658,5.98571573073529,6.51890616245032,7.13773980604554,6.95167461886305,5.27184381…
ENSG00000007306,0.068563437600724,0.104791107049408,0.140337125139541,0.108536991541278,0.0573765205638597,0,0.328153323733755,0,0,0,0.124811799407968,0,0,0,0.137157899053707,0.16455649835093,0.0411109460278234,0.0360627601657675,0,0,0.0234794072567287,0,0,0.282799711487734,0,0.0774096801269457,0.132943352870578,0.263015112906835,0.232832316992551,0.12264312491003,0.036217748638104,0.039030706745…
ENSG00000007312,0.205690312802172,0.523955535247039,0.561348500558163,0.506505960525964,1.66391909635193,2.29801877355992,1.31261329493502,2.19466975600653,0.710527455438116,0.925786143647694,0.499247197631871,0.295339265813166,1.32717633060645,1.1795070039263,0.822947394322239,1.02025028977577,2.50776770769723,3.10139737425601,2.10212635781775,1.77088395751603,2.70013183452381,1.84578946776709,2…
ENSG00000007314,8.43330282488905,9.4311996344467,7.97114870792591,8.7553173176631,10.0408910986755,8.66979810024877,5.90675982720759,6.01764287937274,11.332912914238,10.8008383425564,8.98644955737367,7.82649054404889,7.29946981833547,7.15933320987827,17.0761584321865,19.4834894047501,7.60552501514733,12.8383426190132,11.9001729408666,9.6500343192178,14.2520002048343,9.90014350893255,7.21052186560…
ENSG00000007341,8.36473938728832,6.13027976239036,8.72896918367943,8.24881135713714,9.00811372852598,8.46088730265241,8.86013974081138,10.4777781899667,11.1908074231503,11.2328718762587,13.2300507372446,13.9547803096721,10.7122089541806,10.0669551265338,10.766895075716,10.7619949921508,8.2633001515925,5.69791610619127,7.76717874583507,8.82875480268862,7.56036913666666,8.34200954263566,8.026807359…
ENSG00000007350,0.068563437600724,0,0,0.0723579943608521,0.114753041127719,0.208910797596356,0.109384441244585,0.0707957985808557,0.142105491087623,0,0.124811799407968,0.147669632906583,0.0631988728860214,0.137151977200733,0.0342894747634266,0.065822599340372,0.164443784111294,0.0360627601657675,0,0.0256649848915367,0.093917629026915,0.0719138753675488,0,0.0471332852479557,0.0622584857148683,0,0.…
ENSG00000007372,0.205690312802172,0.0523955535247039,0.561348500558163,0.253252980262982,0.172129561691579,0.52227699399089,0.765691088712094,0.283183194323423,0.248684609403341,0.216016766851129,0.249623598815935,0.590678531626331,0.189596618658064,0.0822911863204399,0.342894747634266,0.065822599340372,0.0822218920556468,0.360627601657675,0.178146301509979,0.23098486402383,0.140876443540372,0.62…
ENSG00000007376,12.6842359561339,11.3698351148607,10.7217563606609,9.33418127254992,8.77860764627054,11.5945492665978,9.73521527076806,10.6901655857092,11.9368612513603,12.7449892442166,10.4841911502693,11.8135706325266,13.4297604882795,14.0169320699149,8.67523711514694,9.34680910633282,13.1143917828757,11.3958322123825,10.1899684463708,9.72702927389241,10.0257068986232,9.9720573843001,10.4756638…
ENSG00000007384,9.53031782650063,9.48359518797141,9.9920033099353,9.98540322179758,10.1556441398032,11.9079154629923,11.594750771926,9.2742496140921,8.13553936476643,8.73324928840991,9.48569675500555,7.67882091114231,14.756936818886,14.7575527467989,10.4582898028451,11.5189548845651,11.1410663735401,16.3364303550927,20.6293417148555,12.4731826572868,17.0695290756418,15.0060286600285,10.0675210953…
ENSG00000007392,63.5583066558711,56.5348022531555,67.7547640173702,69.0657056174333,62.4256543734794,63.0910608740995,79.0849510198349,79.7868650006244,69.4185323963039,69.9894324597656,62.5307115033918,71.4721023267861,60.3233241697074,60.237148386562,61.8582124732216,64.7036151515857,61.7897518798186,42.5179942354399,41.4368297312211,66.4979758539716,45.6674471143374,48.7815787909873,60.8132693…
ENSG00000007402,28.5223900419012,30.4942121513777,33.7370448835456,30.57125261746,31.5570863101228,32.6945398238297,18.9235083353132,20.6723731856099,11.2263337959222,13.5473372353779,29.2059610614644,24.1439849802263,34.9173772695268,30.0088526115204,36.9297643202105,38.045462418735,18.8288132807431,49.0814165856096,42.3631904990729,25.1003552239229,39.821074707412,37.7787558597523,19.9989946083…
ENSG00000007516,5.1422578200543,6.49704863706328,4.09784405407459,3.69025771240346,2.58194342537369,3.65593895793623,3.28153323733755,2.4070571517491,2.80658344898056,2.56134166409195,2.74585958697529,3.02722747458495,3.12834420785806,2.66074835769422,4.08044749684777,3.81771076174158,1.84999257125205,4.72422158171555,6.34200833375524,3.54176791503206,4.50804619329192,4.33880381384211,1.428499614…
ENSG00000007520,14.7411390841557,14.7755460939665,14.6511958645681,11.2878471202929,15.3769075111144,16.1905868137176,11.7041352131706,11.6105109672603,13.3223897894647,14.5657019933904,16.5999693212597,16.465164069084,14.2197463993548,14.5655399787179,13.8529478044244,13.8885684608185,14.5121639478217,16.7331207169161,13.8241529971744,11.6775681256492,12.725838733147,12.32124397964,13.3326630722…
ENSG00000007541,8.0219221992847,8.17370634985381,11.5357116864702,10.4919091823235,8.72123112570668,9.60989668943237,9.51644638827889,6.44241767085787,7.70922289150356,9.47387820332806,8.36239056033384,8.34333425922193,7.04667432679139,6.0621173922724,9.87536873186687,9.70883340270487,7.60552501514733,7.32074031365081,8.372876170969,9.95801413791624,7.72472498746376,8.24612437547893,6.05411741545…
ENSG00000007545,33.1847037987504,32.5376387388411,40.9784405407459,39.5074649210252,32.7619932419639,38.3351313589313,39.7065521717843,37.5217732478535,36.3434793456596,34.1306491624783,41.0630820052214,38.0249304734451,38.5829118969161,37.6345025438812,34.2894747634266,35.2480019467692,30.504321952645,43.8883791217391,40.0116593191412,34.2627548302015,35.9000136955383,36.8918180635525,32.3793246…
ENSG00000007866,22.1459903450338,23.892372407265,28.9094477787454,27.3513218684021,20.4834178412979,22.0400891464155,25.4865748099883,21.8051059629036,20.7118753260211,23.1137940530708,22.9653710910661,22.0766101195341,23.0043897305118,21.3408476524341,27.328711386451,28.9948550094339,22.2410218010525,24.8111789940481,26.4369111440808,24.0224258584783,22.1645604503519,23.6117224123452,21.90366076…
ENSG00000007908,0,0,0,0,0,0,0,0,0,0,0,0,0,0,0,0,0,0,0,0,0,0,0,0,0,0,0,0,0,0,0,0.0390307067450096,0,0,0,0.137303392269098,0,0,0.235294657440685,0.0829940192019942,0.050688859060185,0,0,3.72623379422705,4.61132498014418,3.76915570966729
ENSG00000007923,92.903457948981,80.0080102322229,98.0395156224831,92.0393688270038,89.2778659973657,96.2034222931219,95.6020016477672,89.2735020104591,97.0225240400748,96.1891803249954,96.604332741767,97.6834621677046,97.61065917246,103.686894763754,79.4144235520961,84.3187497550165,89.4163076105159,91.9600384227072,84.5482346966359,84.1811504442404,86.474656926532,87.3034446962043,87.03644082110…
ENSG00000007933,0,0,0,0.036178997180426,0.0573765205638597,0,0,0,0.0355263727719058,0.0308595381215898,0.249623598815935,0.147669632906583,0.0315994364430107,0.0274303954401466,0,0.032911299670186,0.0411109460278234,0,0,0,0.0234794072567287,0,0,0.0942665704959114,0,0.0258032267089819,0.0332358382176444,0.0292239014340928,0.133047038281458,0.0919823436825223,0.108653245914312,0,0,0,0,0,0.071916995…
ENSG00000007944,42.1665141244452,42.8071672296831,48.6689149983927,42.7635746672636,38.442268777786,37.1861219721514,35.8780967282239,34.9731244989427,27.5684652709989,26.9095172420263,51.0480259578588,44.5223943213347,46.6723676263268,45.6990388032843,41.2845276151657,41.3365923857536,30.7920985748397,37.3610195317352,37.3038355361896,34.6477296035745,37.4261751672256,36.1726793098771,32.1412413…
ENSG00000007952,0,0,0,0,0,0.104455398798178,0,0.0707957985808557,0.0355263727719058,0.0308595381215898,0,0,0.221196055101075,0.0274303954401466,0.10286842429028,0.131645198680744,0.164443784111294,0.072125520331535,0.0712585206039915,0.179654894240757,0.093917629026915,0.0719138753675488,0.204071373554758,0.188533140991823,0.0622584857148683,0.0516064534179638,0.0332358382176444,0.058447802868185…
ENSG00000007968,4.79944063205068,3.09133765795753,3.81716980379551,4.34147966165112,4.18848600116176,5.95395773149614,3.28153323733755,4.3185437134322,5.96843062568017,6.78909838674975,6.36540176980635,6.0544549491699,4.61351772067956,3.56595140721906,6.3092633564705,8.19491361787631,3.41220852030934,2.41620493110642,2.24464339902573,3.10546317187594,2.84100827806418,2.70875597217767,2.4488564826…
ENSG00000008018,101.953831712277,99.4991561434127,114.99224033934,111.937817276238,128.351276501354,130.778159295319,136.074244908264,128.281987028511,153.509456747405,149.66875988971,126.184729201455,128.251076179367,128.957300123927,132.680822743989,122.893477552121,122.857881668804,135.912787567984,120.377493433332,116.080130063902,122.652962796654,123.055573432515,121.102966118952,130.4696314…
ENSG00000008056,5.07369438245357,5.97309310181624,8.02728355798173,8.64678032612182,10.9589154276972,12.325737058185,11.2665974481922,11.2565319743561,13.0026524345175,12.714129706095,6.86464896743822,6.57129866434294,9.00583938625805,8.69543535452648,8.74381606467379,8.88605091095022,15.2110500302947,15.50698687128,13.0759385308324,14.0644117205621,12.7727975476604,13.9512918213045,14.9312221650…
ENSG00000008083,848.061159683355,858.920308930471,734.861322080691,704.296538111354,564.871844951199,570.744299033244,1044.73079832703,1090.82166453383,603.628599767452,583.955039874844,562.152344533487,546.599146203716,1289.19380800195,1166.42270530135,664.15283669281,666.552552220277,543.938926894131,777.981925056103,743.689550283557,583.54476147887,705.90837917355,715.734830241424,571.60391732…
ENSG00000008086,72.8829341695696,75.030432647376,77.1292839766916,78.8340348561483,103.679372658895,108.738070148903,127.542258491186,125.379359286696,65.2974731547629,60.1143802608569,75.3863268424125,62.3904199030313,133.539218408163,122.476715640255,73.3451865189696,76.8807960295545,163.95045275896,177.104215174084,157.338813493613,157.839657082951,143.787890040207,145.074257908135,166.0120623…
ENSG00000008118,0.822761251208688,0.523955535247039,0.561348500558163,0.651221949247669,0.688518246766317,0.731187791587246,0.109384441244585,0.0707957985808557,0.42631647326287,0.370314457459077,0.374435398223903,0,0.252795491544086,0.109721581760586,0.960105293375946,0.756959892414278,0.493331352333881,0.360627601657675,0.356292603019958,0.821279516529174,0.704382217701862,0.359569376837744,0.3…
ENSG00000008128,23.9972031602534,22.3205058015239,22.7065468475777,24.5655390855093,16.753944004647,17.4440515992957,23.0801171026074,16.9201958608245,17.9763446225843,17.4664985768198,19.7202643064589,23.7009760815065,17.1900934249978,18.2137825722574,19.4078427160995,21.4252560852911,20.2676963917169,19.3657022090172,20.3443076324396,22.764841598793,21.4601782326501,22.5569855736211,20.37312545…
ENSG00000008130,46.1431935052872,40.6589495351702,43.4203065181739,42.7273956700831,48.7126659587169,48.15393884596,37.7376322293818,37.5925690464344,49.2750790346334,45.8572736486824,50.0495315625951,54.2685900931692,30.6198539132774,30.5848909157635,47.0108699006579,47.1289811277063,45.4687063067727,50.415738711743,52.2324956027258,47.916526792499,51.2085872269254,51.3465070124299,44.4195356437…
ENSG00000008196,0.274253750402896,0.419164428197631,0.0280674250279081,0.036178997180426,0,0,0,0,0,0,0,0,0,0,0,0,0,0,0,0,0,0,0,0,0.0622584857148683,0,0,0.0292239014340928,0.066523519140729,0,0,0,0,0,0,0,0,0,0.0588236643601712,0,0,0.269678057256535,0.868076743294694,0,0.108501764238687,0.163876335202926
ENSG00000008197,0,0,0,0,0,0,0.109384441244585,0,0,0,0,0,0,0,0,0,0,0.072125520331535,0,0,0,0,0,0,0,0,0,0,0,0,0,0,0,0,0,0,0.0359584978524506,0,0,0,0,0,0,0,0,0
ENSG00000008226,0.548507500805792,1.41467994516701,1.06656215106051,0.651221949247669,0.918024329021756,1.35792018437631,1.64076661866877,1.62830336735968,1.2434230470167,1.78985321105221,1.12330619467171,1.10752224679937,1.7695684408086,1.37151977200733,0.480052646687973,0.789871192084464,1.80888162522423,1.26219660580186,1.6389459738918,1.43723915392605,1.00961451203934,0.791052629043037,0.6802…
ENSG00000008256,21.1861022186237,21.7965502662768,13.3320268882564,11.8305320779993,27.6554829117804,28.8296900682971,12.2510574193935,11.6813067658412,15.5605512740947,17.0653245812392,18.3473345129713,20.3784093411084,11.9761864119011,11.8225004347032,17.041868957423,16.817674131465,21.2954700424125,13.8480999036547,14.0379285589863,20.5063229283378,16.7877761885611,14.5985166996124,18.09432845…
ENSG00000008277,29.1394609803077,27.3504789398954,28.1796947280198,27.0257108937782,33.2783819270386,28.9341454670953,24.8302681625208,27.1855866550486,36.9829540555539,33.6677560906545,37.0691044241664,40.6091490493103,18.4540708827182,18.515516922099,39.3300275536503,43.1138025679437,25.0776770769723,16.9855600380765,18.2065520143198,28.4624682447142,19.1591963214907,19.9441147686002,28.0938257…
ENSG00000008282,79.5335876168398,78.8029125011547,71.6280686712216,70.910834473635,79.9254931454566,74.2677885455045,80.3975643147699,91.6097633636273,80.325128837279,79.4015915868505,78.1321864293878,81.4398025479804,89.8371978074794,96.1983968085942,75.6082918533557,75.0706745476943,87.1552055789856,69.024122957279,74.2157492090572,81.2553421666052,69.4990454799171,71.7700476168137,86.220155326…
ENSG00000008283,25.2999084746671,23.0540435508697,22.1732657720474,16.389085722733,19.7375230739677,19.6376149740575,25.3771903687437,23.3626135316824,22.8434576923354,27.3415507757286,26.0856660762653,24.3654894295862,22.1512049465505,24.9616598505334,22.0481322728833,22.7417080720985,23.5976830199706,22.2507230222786,21.8763658254254,18.555784076581,20.0044549827329,20.3516267290163,23.23012468…
ENSG00000008294,104.010734840298,107.568071386217,111.315407660684,115.302464014018,118.138255840987,120.645985611896,90.0233951442934,96.4238776671255,113.790971988414,103.441171783569,115.825349850594,111.638242477377,136.857159234679,124.177400157544,107.291766534762,112.194620575664,105.984018859729,106.781832850838,102.541011149144,109.666480441536,106.338235465724,107.319473340172,104.04238…
ENSG00000008300,50.7369438245357,50.1949402766663,54.7595462294488,51.2656390046637,50.2044554933773,56.8237369462088,38.6127077593385,40.9199715797346,47.889550496529,52.2760575779731,64.0284530962874,49.395492207252,40.3208809012817,38.4848448025257,57.6063176025567,63.8479213601608,35.0676369617334,45.6554543698617,44.9997557614206,37.9328476696912,44.4465179369875,43.891435265994,34.794169191…
ENSG00000008311,1221.2519505441,1294.27496316724,1841.36341895591,1993.49892363865,1215.92322378932,1192.6717434776,1272.79735832199,1389.43834294787,1107.1083546909,1063.0185096744,951.565158686346,930.687861393738,1824.42506247367,1790.93051828717,1381.52293821846,1573.75252762895,932.10847928884,1522.49760867837,1618.74418330057,1421.19853836884,1549.89915242392,1515.58492337109,967.0262154848…
ENSG00000008323,13.0956165817383,13.9896127910959,10.2446101351865,9.18946528382821,13.3687292913793,16.3994976113139,12.4698263018827,12.8140395431349,12.0079139969042,12.4055343248791,14.6029805307322,14.3239543919385,13.0505672509634,12.7002730887879,14.950210996854,15.9948916397104,12.333283808347,14.9660454687935,12.8265337087185,11.6775681256492,12.0449359227018,12.2972726878508,14.01290098…
ENSG00000008324,35.03591661397,33.271176488187,39.2943950390714,39.3265699351231,33.3931349681664,30.7098872466643,40.0347054955181,37.8757522407578,42.1698044802522,37.7720746608259,27.4585958697529,26.6543687396382,31.3150415150236,33.2182088780176,30.8262378123205,30.1467504978904,35.1909697998168,26.5782542421707,31.6744124084742,31.1059616885425,31.0397763933954,30.8270812408893,32.753455455…
ENSG00000008382,8.63899313769122,9.06443075977377,11.6760488116098,8.86385430920438,9.23761981078142,13.1613802485704,6.23491315094134,7.00878405950472,9.09475142960789,9.81333312266555,9.73532035382148,9.5246913224746,5.78269686907096,5.67809185611035,8.98384238801778,9.14934130831171,6.37219663431263,9.12387832193918,7.69592022523108,7.05787084517259,7.60732795118011,7.19138753675488,6.32621258…
ENSG00000008394,193.417457471642,180.974241874327,170.285067644319,167.038429982027,182.801594516457,183.945957283591,177.093410374983,180.529286381182,209.214809253753,204.537018669897,202.819174037948,207.254329784389,165.359850906275,167.956311280018,193.769821888124,184.171632954361,180.024832655839,128.599802751127,136.780730299362,162.100044574946,141.768661016128,147.231674169162,167.20247…
ENSG00000008405,42.4407678748481,44.8505938171465,42.774755742532,39.0371379576797,41.8848600116176,40.5286947336931,42.7693165266327,42.8314581414177,37.0895331738697,39.0064561856895,26.5849132738971,29.5339265813166,38.2353180960429,39.5820606201316,36.9640537949739,34.9188889500673,44.4820436021049,44.3211322437283,43.6458438699448,37.7275277905589,41.2767979573291,39.9122008289896,42.1747505…
ENSG00000008438,0,0.0523955535247039,0.0561348500558163,0.0723579943608521,0,0,0.109384441244585,0,0.106579118315717,0.0308595381215898,0,0,0.0631988728860214,0.0548607908802932,0,0,0.0411109460278234,0.0360627601657675,0.0356292603019958,0.0769949546746101,0.0234794072567287,0.0479425835783659,0,0.141399855743867,0.186775457144605,0.0774096801269457,0.166179191088222,0.116895605736371,0.16630879…
ENSG00000008441,1.64552250241738,0.995515516969374,0.589415925586071,0.868295932330225,0.803271287894036,0.104455398798178,0.765691088712094,0.283183194323423,0.746053828210022,0.401173995580667,0.374435398223903,1.40286151261254,0.631988728860214,0.384025536162053,0.548631596214826,0.460758195382604,1.15110648877905,0.757317963481118,0.926360767851889,0.795614531637638,1.40876443540372,1.1985645…
ENSG00000008513,7.88479532408326,11.2650440078113,7.99921613295382,6.00571353195072,5.73765205638597,8.25197650505606,6.34429759218593,6.23003027511531,10.4447535949403,7.09769376796565,8.36239056033384,7.67882091114231,7.55226530987956,7.37877637339944,7.44081602366358,8.39238141589743,3.65887419647628,6.16673198834625,4.45365753774947,3.13112815676748,5.6350577416149,5.12985644288515,4.28549884…
ENSG00000008516,20.2262140922136,17.9192793054487,16.2510390911588,14.8333888439747,14.9752718671674,17.3395962004975,12.7979796256164,11.1149403771944,20.747401698793,20.7376096177083,20.3443233034987,17.4250166829768,13.8721525984817,12.1790955754251,14.230132026822,14.0531249591694,7.85219069131427,11.5400832530456,10.1543391860688,7.00654087538952,9.79091282605589,10.7870813051323,8.060819255…
ENSG00000008517,0.205690312802172,0.471559981722335,0.505213650502347,0.54268495770639,1.83604865804351,0.940098589183602,2.07830438364711,2.33626135316824,1.31447579256051,1.91329136353857,0.624058997039839,0.147669632906583,0.853184783961289,1.12464621304601,2.0573684858056,1.84303278153042,4.5633150090884,3.60627601657675,3.70544307140756,2.13019374599755,3.40451405222567,3.21215309975051,3.70…
ENSG00000008710,36.4757488035852,39.4014562505773,24.8396711496987,23.0822002011118,30.5243089399734,35.3059247937842,29.7525680185271,26.1236496763358,32.43557834075,38.2041081945282,28.0826548667927,28.2787347016106,25.4691457730666,21.9443163521173,31.2377115094817,33.9973725593021,29.9287687082554,35.7381953242756,33.954685067802,32.183891053987,32.5189790505693,29.9161721529003,26.3932309797…
ENSG00000008735,4.8680040696514,3.03894210443283,5.36087818033046,4.99270161089879,4.64749816567264,7.20742251707428,4.15660876729423,3.61058572762364,5.64869327073302,5.80159316685888,4.11878938046293,3.32256674039811,9.60622867867525,10.0120943356535,3.7375527492135,3.71897686273102,6.3310856882848,6.02248094768318,5.66505238801732,6.41624622288417,5.07155196745341,5.3455980689878,6.42824826697…
ENSG00000008838,45.5946860044814,46.00329599469,49.51093774923,47.8286342725232,46.9913703418011,51.2876008099054,49.1136141188186,45.5924942860711,51.5132405192634,49.3444014564221,53.1698265477942,49.3216573907987,44.334009329544,47.2625713433726,44.5420277176912,46.3720212352921,49.3331352333881,43.3474377192526,40.3679519221612,45.9659879407422,40.0089099654658,40.4635405401408,46.39222558811…
ENSG00000008853,11.5872209545224,13.622843916423,18.5806353684752,17.4744556381458,17.0408266074663,16.0861314149194,17.9390483641119,15.9290546806925,13.8552853810433,15.9543812088619,11.3578737461251,14.2501195754852,21.2980201625892,18.1040609904968,12.9614214605753,14.6455283532328,15.0054953001555,18.2477566438784,16.95952790375,12.8581574306599,15.2616147168737,15.5333970793905,13.910865297…
ENSG00000008869,33.4589575491533,33.8475275769587,32.7266175825409,33.7188253721571,44.179920834172,41.3643379240785,31.3933346371959,27.964340439438,37.1961122921854,34.6552613105453,41.4375174034453,40.9783231315767,28.5974899809247,28.9390671893547,37.7527117145327,37.3872364253313,34.2454180411769,27.0470701243256,23.9784921832431,30.3360121417964,26.226497905766,26.3684209681012,34.249978861…
ENSG00000008952,126.156725185332,125.592141798715,161.163154510249,164.433542185036,124.105413979629,120.854896409492,145.262537972809,154.334840906266,128.037047469949,124.42565770625,136.918543950541,140.286151261254,166.939822728426,172.235452968681,139.832478085254,137.042651826654,137.228337840874,145.657488309535,149.571634747778,123.448577328291,146.675857132784,149.940430141339,129.109155…
ENSG00000008988,588.13716773901,579.128053108552,632.331018453743,632.879197677193,666.485662869795,679.169002985753,598.770431372858,593.410383704733,731.488015373541,741.523841523681,602.965802939892,626.414582789724,632.905112517061,591.12502173516,689.492758542983,656.744984918561,580.239892236699,608.234512955835,634.913418581564,658.691837241289,672.074553316604,640.896457275595,611.2277756…
ENSG00000009307,1081.17684752582,1081.44422474989,1104.3689725731,1109.1756955575,942.351973740832,887.139701992925,862.715088096041,877.79710660403,932.815969871931,897.580525804561,1027.70035632521,980.30485805035,959.674884774235,968.183237455415,874.518764366433,882.615234555048,837.882190993069,875.56775406467,839.175967892906,802.518412573461,890.22172613887,899.474781805511,837.33885759076…
ENSG00000009335,133.355886133408,130.936488258235,116.086869915428,109.622361456691,112.916992469676,110.827178124867,106.431061330981,105.698127281218,105.655432623648,102.021633029976,97.8524507358467,91.4813375856281,119.414270318137,119.185068187437,95.2561608927992,96.1339063366133,107.916233323036,106.132703167854,98.3011291732063,102.120974883425,103.990294740052,101.326650392876,108.15782…
ENSG00000009413,25.4370353498686,29.027136652686,23.0152885228847,24.0590331249833,28.5735072408021,25.9049389019481,22.9707326613628,22.7962471430356,29.806626755629,27.4649889282149,34.3232448371911,26.8758731889981,22.5619976203096,19.2287072035428,24.4141060315598,27.777136921637,26.2287835657513,31.9876682670358,29.8216908727704,31.5166014468071,27.8935358209938,27.9025836426089,29.828432434…
ENSG00000009694,4.38806000644633,5.3967420130445,2.63833795262337,2.71342478853195,6.13928770033299,5.01385914231254,4.48476209102798,3.53978992904279,2.70000433066484,2.62306074033513,14.6029805307322,14.0286151261254,3.38113969940214,2.66074835769422,9.84107925710344,8.39238141589743,5.96108717403439,6.34704578917508,6.27074981315125,6.23659132864342,6.01072825772256,7.59889949717099,6.02010551…
ENSG00000009709,1.57695906481665,1.25749328459289,7.32559793228403,7.81466339097202,0.229506082255439,0.208910797596356,0,0.141591597161711,0,0.0308595381215898,5.49171917395058,5.98062013271661,0.252795491544086,0.219443163521173,0.0342894747634266,0.098733899010558,0.0411109460278234,0.14425104066307,0,0.0256649848915367,0.117397036283644,1.19856458945915,0,0,0,0.0258032267089819,0.997075146529…
ENSG00000009724,1.78264937761882,2.30540435508697,1.12269700111633,1.04919091823235,1.14753041127719,1.98465257716538,2.95337991360379,2.12387395742567,1.70526589305148,1.63555552044426,2.49623598815935,1.25519187970595,1.83276731369462,1.50867174920806,1.30300004101021,1.97467798021116,2.09665824741899,1.3343221261334,1.31828263117384,1.46290413881759,1.29136739912008,1.58210525808607,1.90466615…
ENSG00000009765,0.137126875201448,0,0,0,0,0,0,0,0,0,0,0,0,0,0,0,0,0,0,0,0,0.0239712917891829,0,0,0,0,0,0,0,0,0,0,0,0,0,0,0,0,0,0,0,0,0,0,0,0
ENSG00000009780,18.1007475265911,17.8144881983993,11.0304980359679,12.6264700159687,19.7948995945316,17.8618731944884,15.5325906567311,14.0883639175903,18.6868720780225,15.8309430563756,19.345828908235,18.237199663963,11.5021948652559,12.0968043891047,17.8305268769818,20.3720944958451,19.4865884171883,13.1268447003394,12.7909044484165,17.6831745902688,14.8155059789958,13.8793779459369,17.92426897…
ENSG00000009790,0.479944063205068,0.628746642296447,0.168404550167449,0.289431977443408,0.459012164510878,0.417821595192712,0.109384441244585,0.778753784389413,0.461842846034775,0.246876304972718,0.124811799407968,0.443008898719749,0.126397745772043,0.0822911863204399,0.994394768139372,0.65822599340372,0.452220406306057,0.180313800828838,0.819472986945902,0.256649848915367,0.258273479824016,0.287…
ENSG00000009830,20.2262140922136,19.1243770365169,16.7843201666891,18.0533195930326,22.5489725815969,23.3980093307919,22.7519637788737,21.592718567161,24.7263554492464,22.4348842143958,18.7217699111952,19.5662263601222,19.0544601751354,19.6950239260253,23.385421788657,21.1619656879296,23.8854596421654,18.1035056032153,17.4227082876759,19.5823834722425,16.4590644869669,17.4990430061035,20.54318493…
ENSG00000009844,89.8181032569484,91.2206586865095,84.5110167590314,79.8832257743807,89.163112956238,80.5351124733952,65.083742540528,73.6984263226708,89.9527758584655,88.844610252057,92.610355160712,97.3142880854381,66.7380097676386,69.3440396726906,82.9805289274924,83.2984994652408,89.4163076105159,85.937557475024,83.978166531804,83.8218406557588,84.5963043459937,81.4065069160653,86.42422670044,…
ENSG00000009950,4.25093313124489,5.50153312009391,3.62069782860015,3.69025771240346,4.01635643947018,3.23811736274352,3.39091767858213,3.39819833188108,2.87763619452437,3.57970642210442,2.99548318579123,2.06737486069216,1.89596618658064,2.60588756681393,5.04055279022371,5.46327574525088,4.80998068525534,4.79634710204708,5.55816460711134,8.90574975736323,6.59771343914078,5.39354065256616,3.8093323…
ENSG00000009954,256.63294693951,237.404253020433,266.528268065016,262.840414515795,269.038504923938,256.751370245921,308.026586544751,311.218330561442,298.279425792921,284.247205637964,290.686680821157,287.58661008557,283.130950529376,290.926774038195,240.952139162599,244.300577451791,303.645447361504,244.217011842578,226.922758863411,284.239707673769,225.848418402474,246.976219303952,308.8960357…
ENSG00000010017,54.7821866429785,57.6351088771743,64.8918866645236,64.0006460121736,62.8272900174264,65.7024458440539,49.9886896487753,43.5394161272263,55.8829843702078,53.5412986409583,71.2675374619496,69.9954059977203,52.9606554784859,55.8482851161385,64.9099757271666,64.8352603502664,58.9119856578709,65.0211565788788,57.3987383465152,59.3887750390159,64.4274935124637,64.0033490771184,58.058305…
ENSG00000010030,0.891324688809412,0.733537749345855,0.336809100334898,0.253252980262982,0.573765205638597,0.417821595192712,0.109384441244585,0.212387395742567,0.0710527455438116,0.154297690607949,0.124811799407968,0.221504449359874,0.663588165303225,0.384025536162053,0.651500020505106,0.724048592744092,0.698886082472998,0.57700416265228,0.427551123623949,0.436304743156124,0.704382217701862,0.215…
ENSG00000010072,17.3465497129832,18.0240704124981,21.4154452962939,19.6813744661518,17.6145918131049,18.2796947896811,18.9235083353132,19.3980488111545,19.5395050245482,20.1821379315197,21.0931940999465,18.754043379136,20.3184376328559,18.9544032491413,18.3448689984332,17.0809645288265,20.1854744996613,25.8209362786895,26.0449892807589,20.5063229283378,24.0898718454037,24.6424879592801,19.5908518…
ENSG00000010165,73.8428222959797,68.4285929032633,68.8493935934587,59.8038823392442,65.3518569222362,69.6717509983847,103.477681417377,103.715844920954,74.4277509571427,77.0871262277313,76.5096330370842,74.7946690671842,77.7346136498063,80.8099449666719,66.7958968391551,71.0554959879316,74.246368526249,59.8281191150083,53.5507782338996,61.1596589965319,56.4914538596894,59.3289471782278,73.7037777…
ENSG00000010219,5.27938469525575,5.65871978066802,4.21011375418622,4.59473264191411,4.53274512454492,5.53613613630343,4.3753776497834,4.46013531059391,5.18685042469825,3.85744226519872,4.11878938046293,5.31610678463698,5.27710588598279,4.80031920202566,5.48631596214826,4.67340455316641,4.31664933292146,4.36359398005787,3.91921863321953,3.77275277905589,5.21242841099378,4.84220094141495,3.80933230…
ENSG00000010244,324.442186726626,299.07381951901,357.494792580466,362.477372750688,338.005082641698,337.182027320518,367.531722581805,368.98770220342,377.432184328727,379.88091427677,349.847473740534,328.6387680336,389.399855287221,408.795183244505,306.925088607432,322.03706727277,369.875181412327,339.639075241199,332.135964535204,383.332214339992,328.359510485352,337.995214227479,372.83839948454…
ENSG00000010256,112.581164540389,104.633920388834,118.388398767717,96.8511754520005,108.556376906823,115.318760273188,101.071223709996,93.0256793352444,100.077792098459,105.138446380256,103.718605308021,109.275528350871,97.0734687529289,105.387579281043,105.131529624666,102.71616627065,93.4451803212426,96.9727620857489,85.6171125056958,89.0318325887408,87.3433949950309,92.3134446801435,95.2333076…
ENSG00000010270,33.5960844243547,31.1753543471988,34.2703259590758,36.8302191296737,41.9422365321815,43.2445351024457,36.2062500519576,35.1147160961045,41.6369088886736,42.2158481503348,46.1803657809481,48.8786484920789,33.6849992482494,37.2779074031593,42.9304224038101,40.6783663923499,44.6053764401884,28.1650156894644,33.527133944178,40.7303310228687,33.4816347480952,34.063205632429,41.86864347…
ENSG00000010278,120.397396426871,116.213337717793,79.9921613295382,75.9758940788947,72.2370393898994,79.1771922890189,95.6020016477672,98.9725264160363,72.3672213363721,74.8343799448552,89.1156247772889,87.7157619465102,115.527539635647,119.349650560078,82.2947394322239,73.1289078671533,97.5151639779971,106.276954208517,107.457849070819,80.2030777860522,102.933721413499,104.994258036621,97.818211…
ENSG00000010282,0.068563437600724,0.0523955535247039,0.0842022750837244,0,0.114753041127719,0,0,0.0707957985808557,0,0.0308595381215898,0,0,0.0315994364430107,0.0822911863204399,0.0342894747634266,0.131645198680744,0.0411109460278234,0.14425104066307,0.142517041207983,0.0256649848915367,0.093917629026915,0.0958851671567318,0.0340118955924597,0,0.0622584857148683,0.0258032267089819,0.0664716764352…
ENSG00000010292,225.43658283118,241.176732874212,209.944339208753,205.279630001737,266.112302375181,284.118684731044,208.26797612969,195.891974673228,224.171412190726,240.827835500887,258.984483771533,242.104363150343,204.859146460038,191.025273845181,262.28019246545,249.204361102648,232.276845057202,244.217011842578,202.196052213826,233.885007316574,220.213360660859,219.1695208285,233.2535799730…
ENSG00000010295,8.43330282488905,6.81142195821151,5.24860848021882,5.82481854604859,6.31141726202457,5.95395773149614,10.6102908007247,8.56629162828355,8.02896024645071,7.68402499227586,4.74284837750277,8.12182980986206,5.34030475886881,4.22428089778258,7.16650022555616,7.0430181294198,8.18107825953686,4.94059814271015,8.05221282825104,8.00747528615945,7.70124558020703,7.45507174643589,6.53028395…
ENSG00000010310,0.479944063205068,0.681142195821151,0.252606825251173,0.578863954886817,0.745894767330176,1.46237558317449,0.65630664746751,0.849549582970269,0.67500108266621,0.617190762431796,1.87217699111952,1.10752224679937,0.44239211020215,0.274303954401466,1.5430263643542,1.02025028977577,0.534442298361704,0.793380723646885,1.03324854875788,1.15492432011915,0.821779253985506,0.62325358651875…
ENSG00000010318,5.21082125765502,6.54944419058799,2.38573112737219,2.38781381390812,5.04913380961966,3.13366196394534,2.73461103111462,2.69024034607252,3.33947904055915,3.9191613414419,4.36841297927887,3.61790600621128,2.97034702564301,2.88019152121539,3.42894747634266,4.11391245877325,5.42664487567269,3.67840153690829,3.3847797286896,4.10639758264587,3.66278753204968,3.33200955869643,5.441903294…
ENSG00000010319,2.05690312802172,2.56738212271049,2.44186597742801,2.31545581954727,2.86882602819299,1.56683098197267,0.875075529956679,0.849549582970269,2.38026697571769,1.72813413480903,2.49623598815935,1.91970522778558,0.947983093290321,1.20693739936645,3.05176325394497,2.66581527328507,1.80888162522423,2.12770284978028,2.38716044023372,2.05319879132294,2.72361124178053,1.8218181759779,2.31280…
ENSG00000010322,76.0368522992029,70.0004595090044,85.9985902855105,82.8499035431756,67.5895412242267,74.8945209382936,63.3335914806147,65.4861136872916,65.7237896280257,67.9218434056191,61.906652506352,61.3567324726852,59.8177331866193,56.3694626295013,68.6818179511435,67.9618338189341,65.4486260762948,69.492938839434,63.9901515023844,64.1881272137333,60.6473089441304,62.9725835301836,61.93566187…
ENSG00000010327,1.02845156401086,1.20509773106819,0.898157600893061,0.615042952067243,0.631141726202457,0.313366196394534,0.875075529956679,0.566366388646846,1.03026481038527,0.678909838674975,0,0.369174082266457,0.663588165303225,0.603468699683226,1.30300004101021,1.15189548845651,0.369998514250411,0.721255203315351,1.03324854875788,0.538964682722271,0.704382217701862,0.599282294729574,0.6802379…
ENSG00000010361,8.22761251208688,10.3219240443667,9.96393588490739,8.21263235995671,11.7048101950274,13.1613802485704,7.54752644587636,8.28310843396012,10.2671217310808,11.6957649480825,10.8586265484932,10.0415350376476,9.03743882270106,7.65308032780091,13.4757635820267,12.1771808779688,10.1955146149002,10.386074927741,9.2279784182169,9.47037942497704,8.82825712853001,9.01320571273279,7.652676508…
ENSG00000010379,0.137126875201448,0.157186660574112,0,0,0,0,0,0,0,0.0617190762431796,0,0,0,0.0274303954401466,0.20573684858056,0,0,0.216376560994605,0.0356292603019958,0,0,0,0,0.0471332852479557,0,0,0.0997075146529333,0.0584478028681856,0.133047038281458,0.0613215624550149,0,0,0,0.0674039921969094,0.0332588258031416,0.0686516961345491,0.0359584978524506,0.0312234951555498,0.176470993080514,0.0829…
ENSG00000010404,37.9155809932004,36.100536378521,42.8308905925878,48.6245722104926,77.9173149257215,69.8806617959811,78.2098754898782,81.9815347566309,42.1698044802522,43.1416342939825,43.9337533916046,41.4951668467498,106.016109266301,90.3282921844028,50.23408052842,55.389717344923,88.4296449058481,87.7406954833124,86.7216195750577,88.2105530722116,86.732930406356,83.0605260495189,89.72338057290…
ENSG00000010438,0.205690312802172,0.26197776762352,0.280674250279081,0.108536991541278,0.344259123383158,0.313366196394534,0.21876888248917,0.212387395742567,0.355263727719058,0.678909838674975,0,0.147669632906583,0.189596618658064,0.219443163521173,0.274315798107413,0.394935596042232,0.0411109460278234,0.108188280497303,0.178146301509979,0.102659939566147,0.352191108850931,0.0958851671567318,0.2…
ENSG00000010539,16.8666056497781,15.5614793968371,19.7033323695915,17.7638876155892,16.4096848812639,15.6683098197267,19.6891994240253,18.4069076310225,16.8039743211114,16.0469598232267,26.7097250733051,25.6206813092921,24.2367677517892,21.3408476524341,21.9109743738296,20.174626697824,25.6532303213618,28.4535177707906,29.0734764064285,20.3010030492055,25.9447450186853,29.2689472745924,24.1824577…
ENSG00000010610,0.891324688809412,2.41019546213638,2.18925915217683,2.31545581954727,3.44259123383158,3.55148355913805,1.09384441244585,0.920345381551125,2.80658344898056,2.34532489724082,0.873682595855774,2.51038375941191,1.54837238570752,1.67325412184894,3.7375527492135,3.65315426339065,1.35666121891817,3.20958565475331,3.84796011261554,2.10452876110601,3.09928175788819,3.21215309975051,1.56454…
ENSG00000010626,1.09701500161158,1.3622843916423,0.898157600893061,1.26626490131491,1.43441301409649,1.8801971783672,0.765691088712094,0.424774791485134,1.2078966742448,1.08008383425564,0.748870796447806,0.959852613892789,1.20077858483441,0.685759886003665,1.6801842634079,1.74429888251986,1.02777365069558,1.58676144729377,2.56530674174369,1.56556407838374,1.80791435876811,1.07870813051323,0.81628…
ENSG00000010671,0.959888126410136,1.3098888381176,0.701685625697704,0.723579943608521,0.688518246766317,1.04455398798178,0.546922206222925,0.778753784389413,0.888159319297645,0.740628914918155,0.124811799407968,0.295339265813166,0.568789855974193,0.603468699683226,0.171447373817133,0.230379097691302,1.15110648877905,1.65888696762531,0.712585206039915,1.07792936544454,1.17397036283644,0.8389952126…
ENSG00000010704,0.959888126410136,0.733537749345855,0.477146225474438,0.615042952067243,0.688518246766317,1.25346478557814,1.4219977361796,2.26546555458738,1.2078966742448,1.04922429613405,1.74736519171155,1.47669632906583,0.221196055101075,0.548607908802932,1.5430263643542,1.90885538087079,0.657775136445174,0.721255203315351,0.427551123623949,1.28324924457683,0.493067552391304,0.791052629043037,…
ENSG00000010803,10.0788253273064,9.74557295559493,9.9920033099353,10.0939402133389,13.8277414558902,14.9371220281394,10.1727530357464,7.85833364247499,12.6118623340266,12.0043603292984,16.5999693212597,13.6594410438589,9.32183375068816,9.7103599858119,14.2644215015855,14.513883154552,10.3188474529837,9.44844316343109,11.2588462554307,12.4218526875038,10.8944449671221,10.6672248461864,9.3532712879…
ENSG00000010810,65.4095194710907,61.0932154098047,55.9383780806209,52.6404408975199,65.2371038811085,66.9559106296321,55.7860650347383,52.1765035540907,67.6066873849367,64.7433109790954,65.4013828897751,61.2828976562319,61.7768982460859,63.8305301892212,68.9904232240144,70.956762088921,64.9141837779331,59.8281191150083,58.325099114367,66.2156610201647,61.2577735328053,56.5482773306826,61.28943585…
ENSG00000010818,19.4034528410049,18.8100037153687,25.9904355758429,26.5553839304327,23.4669969106186,25.3826619079572,14.0012084793069,10.6901655857092,25.1526719225093,25.2122426453389,30.5788908549521,21.9289404866276,15.4837238570752,14.3186664197565,17.6933689779281,18.0024809195917,20.2265854456891,25.0996810753742,23.5865703199212,21.9948920520469,21.9297663777846,23.0843539929832,22.039708…
ENSG00000010932,0,0,0.0280674250279081,0.0723579943608521,0.0573765205638597,0.208910797596356,0,0,0.177631863859529,0.0617190762431796,0,0.0738348164532914,0,0.0274303954401466,0.171447373817133,0.131645198680744,0,0,0,0.0769949546746101,0.0234794072567287,0.0479425835783659,0,0.188533140991823,0,0.0774096801269457,0.0997075146529333,0.0292239014340928,0.199570557422187,0.0306607812275074,0.0724…
ENSG00000011007,97.5657717058302,86.714641083385,112.746846337107,110.888626358006,97.1384493146145,101.112826036636,125.135800783805,117.308638248478,120.78966742448,112.729892758167,108.461453685524,111.416738028017,138.942722039918,138.029749854818,79.7230288249669,84.220015856006,101.379592904612,104.473816200229,95.3795298284426,85.310409779468,95.6081463493995,98.138468584915,97.54611655917…
ENSG00000011009,51.0797610125394,47.5227670469064,55.9383780806209,52.3871879172569,56.0568605908909,62.2554176837141,49.3323830013078,42.2650917527709,59.7908853751175,64.9284682078249,57.4134277276652,55.8191212386883,45.2503929863913,45.9459123622456,48.0395541435607,46.3061986359517,47.0720332018578,37.7216471333928,35.5580017813918,43.3481594818055,37.0035458366045,39.7444017864653,43.909357…
ENSG00000011021,22.4888075330375,25.7262167806296,20.9944339208753,22.2139042687816,24.6145273218958,24.5470187175718,19.9079683065145,20.2475983941247,22.5237203373883,24.3481755779343,27.084160471529,27.9095606193442,19.1176590480215,20.2984926257085,21.6709480504856,26.2632171368084,25.6943412673896,20.5557732944875,23.9784921832431,24.5100605714175,21.7888899342443,21.358420984162,26.18915960…
ENSG00000011028,25.8484159754729,28.0316211357166,34.8597418846619,28.5090497781757,29.6636611315155,34.1569154070042,10.7196752419693,9.84061600273895,29.025046554647,29.5017184442398,27.3337840703449,25.325342043479,13.8089537255957,12.9197162523091,33.7408431672118,33.5695256635897,16.2388236809902,18.3559449243757,15.9262793549921,16.6309102097158,19.3705109868012,18.0743540090439,14.59110320…
ENSG00000011052,2.33115687842462,2.51498656918579,2.61027052759546,2.42399281108854,1.49178953466035,3.02920656514716,1.75015105991336,0.49557059006599,1.56316040196386,1.38867921547154,1.24811799407968,1.25519187970595,0.568789855974193,1.09721581760586,3.49752642586952,2.830371771636,1.397772164946,1.80313800828838,2.85034082415966,2.87447830785211,1.50268206443064,1.34239234019424,0.6462260162…
ENSG00000011083,0,0,0.364876525362806,0.687400946428095,0,0,0,0,0.0355263727719058,0,0,0,0,0.0274303954401466,0,0.032911299670186,0,0.072125520331535,0.106887780905987,0,0.0234794072567287,0.0958851671567318,0.0340118955924597,0,0,0,0.0332358382176444,0,0,0.0613215624550149,0,0.0780614134900192,0.0835620880310721,0,0.0665176516062832,0.102977544201824,0,0,0.117647328720342,0,0,0,0.102126675681729…
ENSG00000011105,23.1744419090447,23.001647997345,19.5068603943962,17.1488446635219,21.286689129192,24.8603849139664,19.9079683065145,20.9555563799333,21.4579291542311,23.0829345149492,20.8435705011306,21.4859315879078,23.541580150043,22.7946586107618,22.1167112224102,22.5442402740774,23.4743501818872,24.5226769127219,22.4108047299553,20.9169626866024,22.8454632607971,21.6460764856322,22.039708343…
ENSG00000011114,75.4883447983971,76.0259481643454,66.2110556408353,65.049836930406,84.2861087083099,80.9529340685879,73.6157289576057,80.1408439935287,80.4317079555947,79.4941702012153,92.2359197624881,90.0784760730156,94.8615082019181,95.046320200108,81.8489762602994,82.5744508724967,90.1151936929889,65.309658660205,64.9521415305383,87.6715883894893,66.4936813510558,71.9618179511272,96.083605048…
ENSG00000011132,7.88479532408326,7.33537749345855,4.74339482971648,4.41383765601198,8.95073720796212,7.20742251707428,8.09444865209928,6.44241767085787,7.70922289150356,8.02347991161334,7.36389616507009,7.45731646178243,6.41468559793117,6.30899095123372,6.44642125552421,7.60251022381297,8.2633001515925,6.8879871916616,6.80518871768119,7.18619576963027,6.73858988268115,6.73593299276041,8.230878733…
ENSG00000011143,13.3698703321412,11.9461862036325,12.9390829378657,12.9520809905925,14.4015066615288,16.6084084089103,12.3604418606381,13.8051807232669,15.2408139191476,17.9602511867653,16.7247811206677,17.1296774171636,11.691791483914,12.3985387389463,16.8361321088425,16.1923594377315,12.6210604305418,11.4679577327141,13.0046800102284,12.8324924457683,14.1580825758074,11.7219616849105,14.2509842…
ENSG00000011198,17.0037325249795,15.0899194151147,26.0185030008708,25.9765199755459,24.7292803630235,23.9202863247828,26.9085725461679,27.8935446408572,27.8526762531741,26.2923264795945,24.2134890851457,26.7282035560915,27.3651119596473,29.2682319346364,19.0649479684652,20.701207492547,24.5843457246384,13.4514095418313,15.3205819298582,22.1232169765046,16.7877761885611,18.6256937201951,24.0464101…
ENSG00000011201,103.530790777093,94.4691830050411,113.841475913195,111.901638279058,242.874811546818,214.029112137467,356.483894016102,353.483422314213,308.68865301509,315.261041450161,116.199785248818,110.973729129297,184.82510375517,176.596885843664,142.129872894403,140.662894790375,168.349323983937,164.951064998221,162.790090319819,187.944684360723,173.254546147401,155.357942085695,162.4748252…
ENSG00000011243,74.8027104223899,82.8897656760816,65.9584488155841,60.1656723110485,71.0895089786222,65.4935350464576,56.8799094471842,66.1940716731001,59.3290425290827,64.1569797547852,66.1502536862229,73.6871468203849,64.905242453944,62.5138712080941,72.7279759732279,74.5440937529713,66.5175106730183,80.4199551696616,80.4508697619064,73.068211986205,72.9974771611697,70.763253361668,62.990030637…
ENSG00000011258,137.812509577455,140.629665660305,154.595377053718,154.918465926584,149.465836068855,138.403403407586,122.948111958913,128.777557618577,158.341043444384,158.40200917812,163.253833625622,156.825150146791,128.514908013725,131.391594158302,147.239004634154,147.574267721114,132.007247695341,131.232384243228,128.300966347487,135.228805393507,133.926538992381,136.971961283391,129.483286…
ENSG00000011260,89.8866666945491,81.9466457126369,104.551158228958,99.2028102687282,86.1795338869173,81.8930326577715,87.8357063194017,95.220349091251,94.5001515732694,90.6653230012308,85.8705179926818,79.7416017695547,78.2718040693375,90.2185706026422,83.5291605237073,80.5997728922855,88.7996434200985,76.7776163929191,67.7668530943959,82.5899213809651,72.7392036813457,72.2255021608082,85.9820720…
ENSG00000011275,56.1534553949929,58.1066688588966,50.5774999002905,53.2916628467675,76.5402784321889,77.7148167058444,53.5983762098466,54.5127649072589,56.4158799617864,55.7014663094696,58.037486724705,54.0470856438093,54.5406273006365,52.6114984542012,49.3425541845709,54.0403540584454,57.1442149786745,64.4441524162266,57.8975479907431,60.1073946159789,60.6707883513871,59.1371768439143,55.7454968…
ENSG00000011295,52.9995372653596,55.3297045220873,62.7026275123468,59.9847773251464,57.7781562078067,54.003441178658,56.1142183584721,59.9640413979848,64.1961555988338,63.5397889923534,64.4028884945113,66.9681785231353,66.1060210387784,63.8579605846613,59.9037124117063,55.6200964426143,55.0886676772833,66.5718552660068,65.3440633938602,55.1283875470208,64.6153287705175,68.4620093499065,53.0925690…
ENSG00000011304,539.7999442305,503.521269372405,562.246658159056,551.476454021234,524.765657077061,559.567571361839,570.330476649266,564.171718890839,561.529848032743,552.354872838336,509.981012380956,496.760645097745,592.931825416653,606.705486345163,478.338172949801,459.935412890849,569.879933837688,561.172610939508,514.165855418101,522.231112572989,526.314393066832,518.523012691816,534.5649630…
ENSG00000011332,10.1473887649071,9.378804080922,20.9944339208753,19.4281214858888,12.0490693184105,11.6990046653959,20.3455060714928,19.5396404083162,15.5960776468666,16.849307814388,10.9834383479012,12.9949276957793,18.2960737005032,18.2686433631376,10.5611582271354,12.3746486759899,19.1165899029379,23.3686685874174,27.4701596928387,16.2202704514512,21.8593281560145,22.9884688258264,18.094328455…
ENSG00000011347,14.1240681457491,16.7665771279053,18.8051747686985,19.3919424887084,11.1310449893888,11.6990046653959,12.7979796256164,9.41584121125381,8.17106573753833,8.4555134453156,11.9819327431649,10.4845439363674,17.600886098757,16.3485156823274,16.8361321088425,16.9164080304756,9.29107380228809,14.9660454687935,15.8550208343881,9.52170939476011,14.4163560556315,13.9033492377261,8.673033376…
ENSG00000011376,86.8013120025166,84.9855878170697,74.855822549431,65.9181328627362,74.1304645685068,84.1910514313314,76.2409555474757,70.5834111851132,78.0514409798771,79.7719060443096,116.07497344941,106.838979407913,101.528989291393,97.4601949988409,99.5080557634641,96.3642854343046,97.9262734382753,83.9901684260726,71.1516328230855,82.9748961543381,71.494795096739,79.7045451990333,93.328641505…
ENSG00000011405,274.048060090094,282.25484683758,268.998201467472,278.144130323115,289.521922765236,272.106313869254,261.428814574558,251.183493364876,316.8952451254,298.133997792679,348.22492034823,317.489710749153,275.073094236408,268.241837009194,278.807719301422,292.087784572901,303.604336415476,245.73164776954,225.497588451331,308.852428184753,246.040708643261,256.277080518155,311.3789041489…
ENSG00000011422,6.44496313446805,5.92069754829154,11.3673071363028,10.9622361456691,5.50814597413053,6.47623472548703,9.95398415325723,7.78753784389413,5.25790317024206,6.81995792487134,3.61954218283106,5.83295049981002,7.42586756410751,5.78781343787094,5.82921070978253,5.36454184624032,3.61776325044846,5.87822990702011,4.70306235986344,6.21092634375188,5.51766070533126,4.2189473548962,4.62561780…
ENSG00000011426,159.478555859284,158.024989430507,157.65472638176,154.773749937863,179.359003282626,174.962792986948,177.530948139961,193.343325924317,169.283166258131,158.494587792485,170.7425415901,177.425063937259,176.388054224886,180.546862787045,153.342531142044,151.391978482856,187.260359156736,144.791982065557,142.944592331607,172.18638363732,147.661992237567,148.094640673572,178.324368591…
ENSG00000011451,31.2649275459301,32.3280565247423,38.4243048632062,33.6826463749766,40.909459162032,45.8559200724001,34.0185612270659,34.2651665131342,45.5092835208113,45.8572736486824,36.0706100289027,35.5145467140332,38.5829118969161,36.3178435627541,33.1236326214701,33.1087674682071,37.6165156154584,36.0988229259333,33.0283242999501,35.6999939841275,33.0355260102173,33.3200955869643,36.1206331…
ENSG00000011454,56.9762166462016,57.1111533419273,56.9488053816256,59.5868083561617,62.3682778529155,60.5841313029432,52.8326851211345,51.7517287626056,59.2935161563108,53.6030177172015,68.2720542761583,65.6391518269761,50.7170954910322,49.3472813968238,68.956133749251,72.5694157727601,50.6075745602506,34.5481242388053,36.3418455080357,55.2567124714785,38.9288572316563,44.4427749771452,49.5553318…
ENSG00000011465,0.411380625604344,0.314373321148223,0,0,0,0,0,0,0,0,0,0,0,0,0,0.065822599340372,0.0822218920556468,0,0,0,0,0.0239712917891829,0,0,0,0,0,0.0584478028681856,0,0.0306607812275074,0,0,0,0,0,0,0,0,0.0588236643601712,0.0829940192019942,0.152066577180555,22.5450855866463,29.1061025692927,42.7083719492177,63.9617900187057,43.5911051639782
ENSG00000011478,8.50186626248977,7.07339972583503,5.44508045541418,3.58172072086218,9.23761981078142,6.26732392789068,2.95337991360379,3.61058572762364,8.17106573753833,8.79496836465309,6.36540176980635,4.72542825301065,4.1395261740344,3.70310338441979,5.41773701262141,4.60758195382604,7.68774690720297,7.82561895597155,7.23273984130514,6.647231086908,6.64467225365424,6.54416265844694,7.3125575523…
ENSG00000011485,82.4132519960702,76.5499036995924,87.4300289619339,83.3564095037016,85.089379996204,94.8455021087456,87.6169374369125,87.857586038842,85.5830320075211,89.0914865570297,85.4960825944579,84.0978559402989,90.5323854092257,89.5602411120787,85.6893974338031,85.2402661457817,83.2907766523702,81.6821517754634,76.0328414844589,75.6603754602502,74.0305710804657,74.0712916285753,78.90759777…
ENSG00000011523,34.6930994259663,35.209811968601,48.8653869735881,45.00667249245,40.6225765592127,36.5593895793623,42.9880854091219,44.3889657101966,43.2000692906375,44.0365608995086,41.0630820052214,38.8371134544313,47.9047456476042,42.5445433276674,44.7134750915083,51.670740482192,41.2342788659069,41.0394210686434,42.7551123623949,41.9622502976625,43.1786299451242,43.0044974697942,43.0590598200…
ENSG00000011566,83.1674498096782,85.4047522452674,68.0635056926772,63.096171082663,63.9748204287036,63.2999716716958,66.7245091591968,69.7338616021429,68.4237939586906,67.7366861768896,95.6058383465033,99.0863236803171,67.4647968058278,67.9999502961235,76.9112918943659,77.4402881239477,65.6130698604061,42.9507473574291,43.4320683081328,62.5455681806749,49.0250023520496,55.8291385770071,64.9287086…
ENSG00000011590,0.822761251208688,0.94311996344467,1.43143867642332,1.70041286748002,0.516388685074737,0.52227699399089,0.65630664746751,1.06193697871284,0.67500108266621,0.586331224310206,0.499247197631871,0.738348164532914,0.8847842204043,0.768051072324105,1.09726319242965,1.1848067881267,0.781107974528644,1.3343221261334,1.99523857691176,0.333644803589977,1.15049095557971,1.77387559239954,0.47…
ENSG00000011600,0,0.0523955535247039,0,0,0.0573765205638597,0,0,0,0.0710527455438116,0.0617190762431796,0,0,0,0,0,0,0.0822218920556468,0.0360627601657675,0.0712585206039915,0.0769949546746101,0.0469588145134575,0.0958851671567318,0.0340118955924597,0,0.124516971429737,0.0258032267089819,0,0,0,0,0,0,0,0.0337019960984547,0,0,0.0359584978524506,0,0,0,0,0.053935611451307,0,0.047772228131116,0,0
ENSG00000011638,12.5471090809325,13.7276350234724,12.6022738375308,10.2024772048801,16.3523083607,15.5638544209285,8.42260197583304,11.6105109672603,15.4894985285509,15.5532072132813,13.9789215336924,16.3913292526307,10.7754078270666,9.98466394021337,16.3217899873911,15.2708430469663,10.0721817768167,9.55663144392839,8.97857359610293,10.8819535940116,11.0588008179192,10.5953109708189,10.271592468…
ENSG00000011677,5.62220188325937,6.6542352976374,7.99921613295382,7.88702138533287,9.40974937247299,9.29653049303784,10.9384441244585,8.49549582970269,13.215810671149,13.9485112309586,11.8571209437569,9.89386540474105,7.9630579836387,10.6429934307769,10.766895075716,9.44554300534338,1.27443932686253,0.43275312198921,0.178146301509979,1.10359435033608,1.73747613699793,2.37315788712911,1.7005947796…
ENSG00000012048,87.692636691326,82.6277879084581,72.4420239970309,72.9368583157389,93.9253641630384,93.5920373231674,83.8978664345966,84.7425709012843,92.9014647985337,88.31999810399,124.312552210336,123.82098719217,110.945621351411,107.938606056977,102.731266391226,105.776917139978,90.6496359913506,66.7521690668357,60.5341132530908,88.6725228002593,68.3015957098239,77.3313873119042,100.335091997…
ENSG00000012061,24.8199644114621,22.2681102479992,34.7194047595224,32.9590664313681,21.1145595675004,29.1430562646917,27.4554947523908,25.6280790862698,25.3658301591407,28.4833536862274,25.8360424774493,25.2515072270257,28.6606888538107,25.2908245958152,29.8318430441812,30.9366216899748,26.7221149180852,35.7021325641098,32.5651439160241,25.9216347404521,32.9416083811904,30.7791386573109,22.890005…
ENSG00000012124,0,0.471559981722335,0.0842022750837244,0.036178997180426,0.286882602819299,0.208910797596356,0.21876888248917,0.0707957985808557,0.177631863859529,0.339454919337488,0,0.0738348164532914,0,0,0.30860527287084,0.16455649835093,0.328887568222587,0.0360627601657675,0.24940482211397,0.23098486402383,0.164355850797101,0.0719138753675488,0.0680237911849193,0.32993299673569,0.0622584857148…
ENSG00000012171,4.59375031924851,4.24403983550102,2.04892202703729,1.77277086184088,2.69669646650141,3.65593895793623,4.3753776497834,3.61058572762364,1.91842412968291,2.43790351160559,0.624058997039839,1.10752224679937,3.03354589852903,3.2367866619373,4.32047382019176,4.44302545547511,6.37219663431263,6.23885750867778,5.73631090862132,4.85068214450043,6.19856351577639,6.16062198982002,4.79567727…
ENSG00000012174,19.4034528410049,17.1857415561029,14.3143867642332,17.2573816550632,32.0160984746337,33.5301830142151,32.5965634908863,33.2032295344213,23.8381961299488,23.7309848155025,29.3307728608724,25.6945161257454,35.486167125501,33.8765383685811,25.71710607257,27.250556126914,41.3576117039903,34.3317476778107,32.4582561351181,37.5735378812097,34.7495227399585,29.6524879432193,40.7122390241…
ENSG00000012211,5.96501907126299,5.65871978066802,2.77867507776291,2.27927682236684,6.65567638540773,7.72969951106517,4.04722432604964,3.89376892194707,3.19737354947152,2.77735843094308,2.62104778756732,4.43008898719749,3.5391368816172,3.09963468473657,5.34915806309455,6.48352603502664,11.5110648877905,7.39286583398234,7.5177739237211,11.2412633824931,6.03420766497929,6.37636361592266,12.10823483…
ENSG00000012223,1.16557843921231,0.681142195821151,0.561348500558163,0.506505960525964,0.172129561691579,0.104455398798178,0.328153323733755,0.353978992904279,0.461842846034775,0.308595381215898,1.12330619467171,0.369174082266457,0.126397745772043,0.438886327042346,1.37157899053707,2.13923447856209,0.739997028500821,0.829443483812653,0.463180383925945,0.590294652505344,0.586985181418219,0.4314832…
ENSG00000012232,130.68191206698,134.656572558489,140.112585739317,131.980981714194,158.703455879636,168.904379856654,124.917031901316,125.7333382796,149.566029369723,155.161757675353,144.656875513835,144.863909881358,149.623331557656,141.787714030118,139.283846489039,134.311013954029,134.556126349066,135.55991546312,113.55045258246,117.314645939214,116.997886360279,119.281147942974,131.8641192119…
ENSG00000012504,0,0,0,0,0,0,0,0,0.0710527455438116,0,0,0,0.0631988728860214,0,0,0,0,0,0,0,0,0,0,0.0471332852479557,0,0,0,0,0,0,0,0,0,0,0,0,0,0,0,0,0,0,0,0,0,0
ENSG00000012660,240.58910254094,249.664812545214,214.54739691333,209.802004649291,218.088154663231,210.477628578329,185.078474585838,182.79475193577,202.393745681547,199.290897189227,213.677800586441,201.126040018766,177.430835627505,179.230203805918,209.234375006429,204.642461349217,213.448031776459,206.351113668522,199.488228430874,214.045973995416,215.329643951459,205.409999341509,212.91446640…
ENSG00000012779,3.01679125443185,4.0868531749269,4.09784405407459,2.6410667941711,1.66391909635193,1.67128638077085,0.43753776497834,0.849549582970269,1.10131755592908,0.956645681769283,1.74736519171155,1.40286151261254,1.80116787725161,1.45381095832777,2.40026323343986,2.76454917229562,1.10999554275123,3.96690361823443,3.59855529050157,1.36024419925144,3.12276116514492,2.68478468038849,1.2584401…
ENSG00000012817,44.0862903772655,44.4838249424736,48.8373195485602,44.9704934952696,0,0,0,0,0,0,0,0,0,0,0,0,0,0,0,0,0,0,0,0,0,0,0,5.17263055383443,3.35943771660681,0,0,0,0,0,0,0,0,0,0,0,0,0,0,0,0,0
ENSG00000012822,13.5755606449433,14.3563816657689,17.2895338171914,18.4151095648369,14.8031423054758,15.7727652185249,12.4698263018827,13.5219975289434,13.0737051800613,13.6707753878643,13.2300507372446,15.209972189378,14.4725418908989,13.7151977200733,17.2476058060036,17.2126097275073,14.7177186779608,15.7954889526062,17.173303465562,16.7079051643904,16.7877761885611,15.9409090398067,13.26463928…
ENSG00000012963,52.5195932021546,49.6709847414193,69.0177981436261,61.0339682433787,68.3354359915569,62.2554176837141,57.2080627709179,58.0525548363017,62.988258924589,62.0276716243955,66.0254418868149,70.5860845293466,72.8051015646967,76.8325376278507,59.4922387145452,58.220089116559,64.3386305335436,48.9011027847808,47.0306235986344,56.7709465800792,51.8425312228571,52.1615309332621,60.43913846…
ENSG00000012983,49.434238510122,47.6799537074805,51.644062051351,52.2424719285352,48.4831598764615,44.2890890904275,61.2552870969676,57.9817590377209,52.1527152291577,49.3752609945437,53.2946383472022,57.517322017114,52.1390701309677,52.9955239903633,52.2571595394622,56.4757902340392,45.8387048210231,53.3368222851702,58.396357634971,56.2319818973569,58.0176153313767,60.7432533937896,53.0585571242…
ENSG00000013016,17.4151131505839,18.2860481801217,18.4683656683636,16.9679496776198,19.62277003284,18.4886055872775,18.8141238940686,18.7608866239268,19.7171368884077,21.8485529900856,16.1007221236278,19.7877308094821,20.602832560843,17.2811491272924,22.1167112224102,21.1290543882594,20.1854744996613,22.8998527052624,19.8098687279096,18.9920888197372,19.1122375069772,17.3791865471576,23.196112794…
ENSG00000013275,78.5736994904297,69.4241084202327,75.6697778752403,68.957168625892,79.9254931454566,85.2356054193132,76.0221866649865,76.1054834744199,95.8856801113738,96.2817589393601,82.7502230074826,86.4605700668043,72.7419026918106,74.0346372929557,70.3962916893149,66.4808253337757,86.12743192829,71.981269290872,64.0970392832904,71.4769829229297,63.3709201859109,67.4072725111824,80.9823234056…
ENSG00000013288,3.4281718800362,4.50601760312454,4.85566452982811,3.94351069266644,9.81138501642001,10.549995278616,6.12552870969676,6.01764287937274,4.2631647326287,4.04259949392826,9.48569675500555,9.96770022119434,7.33106925477848,7.02218123267753,8.84668448896407,8.95187351029059,6.16664190417351,7.96986999663462,8.58665173278098,7.69949546746101,8.0064778745445,9.1330621716787,5.713998459533…
ENSG00000013293,1.4398321896152,0.681142195821151,0.870090175865152,0.54268495770639,1.20490693184105,2.50692957115627,0.65630664746751,0.637162187227702,1.45658128364814,1.08008383425564,0.748870796447806,0.959852613892789,2.0539633687957,2.13957084433144,1.61160531388105,1.34936328647763,0.781107974528644,0.865506243978421,0.819472986945902,0.744284561854564,1.26788799186335,0.503397127572842,0…
ENSG00000013297,4.8680040696514,7.91172858223029,2.46993340245592,2.46017180826897,3.67209731608702,3.96930515433076,3.06276435484838,2.69024034607252,3.23289992224343,3.61056596022601,3.61954218283106,3.02722747458495,4.04472786470537,3.48366022089862,6.89218442744875,4.90378365085771,2.58998959975287,3.82265257757136,3.56292603019957,4.26038749199509,4.34369034249482,4.19497606310701,2.07472563…
ENSG00000013306,83.5102669976818,79.1172858223029,75.6136430251845,68.0165146992009,85.2041330373317,96.9346100847091,73.9438822813394,77.9461742375222,83.0606595407158,85.3883419824389,80.3787988187312,77.9695661746757,72.6155049460386,76.2564993236076,79.2429761782789,84.055459357655,76.9185800180576,91.5994108210495,79.7026552955645,71.9132876660858,76.6367852859626,74.3829184218347,77.4450862…
ENSG00000013364,1.57695906481665,2.61977767623519,1.01042730100469,0.651221949247669,1.14753041127719,1.35792018437631,0.109384441244585,0.920345381551125,0.603948337122399,0.401173995580667,0.624058997039839,0.443008898719749,0.505590983088171,1.09721581760586,1.81734216246161,1.44809718548818,0.822218920556468,1.69494972779107,1.17576558996586,0.975269425878394,1.64355850797101,1.41430621556179…
ENSG00000013374,45.1833053788771,44.0122649607513,42.1292049668901,41.2078777885053,47.6225120680036,41.3643379240785,41.894240996676,44.4597615087774,45.0474406747766,40.6111521680122,39.8149640111417,41.8643409290162,50.6538966181461,48.7163823017004,44.7477645662717,45.4505048445269,46.8664784717187,45.2227012478725,45.7479702277625,45.42702325802,47.3579644368219,47.8706697029983,46.834380230…
ENSG00000013375,76.2425426120051,78.0693747518088,71.5157989711099,70.4766865074699,87.7860764627054,87.429168794075,69.1309668665777,70.7957985808557,81.6751310026114,81.1297257216596,76.3848212376762,77.4527224595027,78.5877984337676,78.396070167939,81.1288972902674,80.2377485959135,90.2796374771002,93.0058584675144,89.6075896595193,84.1554854593488,99.0830986233953,89.7245451669117,94.75714112…
ENSG00000013392,7.95335876168398,8.64526633157614,4.43465315440949,3.00285676597536,8.72123112570668,8.87870889784513,3.71907100231589,3.53978992904279,9.73422613950219,6.9433960773577,5.99096637158245,8.78634315794168,4.01312842826236,4.55344564306434,8.74381606467379,9.08351870897133,7.23552650089692,4.39965674022364,5.52253534680934,8.6747648933394,6.59771343914078,5.87296648834982,6.768367222…
ENSG00000013441,14.4668853337528,12.1033728642066,22.0890634969637,25.6147300037416,18.1883570187435,15.6683098197267,44.5194675865461,43.7518035229688,27.6750443893146,24.7184900353934,23.4646182886979,24.7346635118526,38.2037186595999,43.5320375635127,20.1279216861314,22.3467724760563,32.3954254699248,15.5791123916116,28.1827448988786,25.536659967079,22.0941222285817,24.0911482481289,31.5290272…
ENSG00000013503,33.3218306739519,31.2277499007235,38.0032934877876,39.4351069266644,36.6635966403064,34.052460008206,40.8003965842302,43.5394161272263,43.6974385094441,39.2841920287838,45.6811185833162,41.1998275809366,38.7093096426881,37.1407554259585,34.9409747839317,36.6960991322574,34.6565275014551,31.8434172263727,27.5414182134427,30.5413320209287,31.1806528369358,33.4878946294886,35.1002762…
ENSG00000013523,34.3502822379627,33.8475275769587,30.7899652556152,31.5480855413315,36.4340905580509,37.7083989661422,40.6910121429856,31.7165177642234,34.0697914882577,34.7786994630317,35.1969274330469,36.5482341443793,32.357822917643,31.7643979196898,35.283869531566,36.3669861355555,38.6031783201262,31.0139737425601,26.9713500486108,34.8273844978153,30.1006001031263,30.7791386573109,35.13428814…
ENSG00000013561,19.9519603418107,17.4477193237264,15.9422974158518,15.7016847763049,24.8440334041513,25.4871173067554,19.3610461002915,20.7431689841907,23.6605642660893,22.496603290639,24.7127362827776,23.4056368156934,22.9095914211828,21.3957084433144,18.6877637460675,20.9974091895787,21.7888013947464,13.4874723019971,13.0403092705304,18.0168193938588,15.6842440474948,14.9580860764502,20.3731254…
ENSG00000013563,3.35960844243547,3.51050208615516,5.05213650502347,4.3053006644707,6.36879378258843,7.1029671182761,6.01614426845217,5.52207228930675,2.91316256729628,3.08595381215898,7.23908436566213,4.65159343655736,7.42586756410751,7.13190281443812,5.86350018454595,5.1670740482192,6.24886379622916,9.48450592359686,7.94532504734505,8.11013522572559,7.79516320923394,7.79066983148446,4.5916059049…
ENSG00000013573,69.3861988519327,75.921157057296,72.4700914220588,71.8153094031457,61.6797596061492,64.4489810584758,81.9289464921941,78.9373154176542,71.4435356443026,72.6124932001008,61.0329699104962,70.3645800799867,68.001987225359,70.5784074674972,73.619502317077,75.3997875443961,64.8730728319053,50.9206173540637,61.7811373636606,65.7793562770085,58.3228476257142,57.4591864186715,61.289435857…
ENSG00000013583,19.2663259658034,17.9192793054487,16.1387693910472,14.5077778693508,19.8522761150955,21.4133567536265,13.2355173905948,14.1591597161711,18.1539764864439,16.8184482762664,14.6029805307322,15.0623025564715,11.691791483914,12.2613867617455,18.9963690189384,20.6353848932066,17.5954848999084,17.3822503998999,15.5343574916701,16.9902199981973,17.9852259586542,16.4682774591687,17.0739715…
ENSG00000013588,0.548507500805792,1.78144881983993,0.477146225474438,0.325610974623834,3.49996775439544,2.19356337476174,1.31261329493502,0.849549582970269,1.27894941978861,1.45039829171472,1.87217699111952,0.959852613892789,0.8847842204043,0.301734349841613,1.64589478864448,2.30379097691302,1.43888311097382,0.793380723646885,0.819472986945902,1.87354389708218,1.15049095557971,0.599282294729574,1…
ENSG00000013619,0.34281718800362,0,0.336809100334898,0.434147966165112,0.459012164510878,0.417821595192712,0.328153323733755,0.283183194323423,0.355263727719058,0.185157228729539,0,0.221504449359874,2.3699577332258,1.20693739936645,0.274315798107413,0.098733899010558,0.24666567616694,1.11794556513879,0.926360767851889,0.436304743156124,0.774820439472049,0.743110045464671,0.476166538294435,0.65986…
ENSG00000013725,0,0.209582214098816,0,0.217073983082556,0,0.208910797596356,0.109384441244585,0,0,0.0308595381215898,0,0,0.0631988728860214,0,0.0342894747634266,0.032911299670186,0,0.0360627601657675,0.0356292603019958,0.128324924457683,0.0469588145134575,0.0958851671567318,0.0680237911849193,0,0.124516971429737,0.0258032267089819,0.0997075146529333,0.20456731003865,0.166308797851823,0,0.07243549…
ENSG00000013810,152.622212099212,149.012954224258,135.032381809266,124.057781331681,154.113334234527,165.039530101121,128.089180697409,119.078533212999,158.838412663191,163.370394815696,138.915532741068,139.695472729627,105.668515465428,111.477127068756,128.619819837613,131.842666478765,145.697192722606,144.719856545225,126.127581469065,134.920825574808,127.845372512888,123.979521133654,141.59152…
ENSG00000014123,30.6478566075236,34.1619008981069,40.3048223400761,41.6058467574899,36.7783496814341,36.4549341805641,22.9707326613628,26.0528538777549,34.1053178610296,34.6552613105453,46.429989379764,39.0586179037912,39.8152899181935,40.7341372286177,37.2040801183179,37.0910347282996,30.2165453304502,36.7118898487513,36.2705869874317,28.0518284864496,43.2960269814078,40.4155979565624,31.2569320…
ENSG00000014138,26.9454309770845,23.0540435508697,30.4531561552803,30.4627156259187,38.2127626955306,38.6484975553258,34.5654834332888,34.7607371032002,44.1948077282508,45.1166447337643,36.0706100289027,44.5223943213347,32.3262234811999,29.9814222160803,39.5357644022309,35.9391392398431,34.1631961491212,32.2401075881962,28.7528130637106,35.0583693618391,27.2595918250621,28.8134927305979,31.188908…
ENSG00000014164,21.117538781023,19.0195859294675,17.0649944169682,15.8464007650266,21.3440656497558,22.6668215392046,19.9079683065145,17.0617874579862,21.8487192547221,22.5891819050037,22.8405592916581,19.1970522778558,19.1492584844645,17.582883477134,21.5680796261953,21.2606995869402,22.2410218010525,15.9397399932692,17.5295960685819,19.0177538046287,16.5999409305072,19.2249760149247,20.40713735…
ENSG00000014216,138.361017078261,135.861670289557,140.589731964792,120.729313591082,127.662758254588,149.162309483798,103.258912534888,107.680409641482,111.517284131012,114.025993359274,151.271900882457,146.783615109143,119.509068627466,121.928107731452,155.262741728796,153.136277365375,118.111747937937,145.477174508706,118.00411012021,114.619822525603,120.825029743126,124.267176635124,114.416016…
ENSG00000014257,1.91977625282027,2.04342658746345,1.40337125139541,0.976832923871503,0.344259123383158,0.626732392789068,0.546922206222925,0.49557059006599,0.390790100490964,0.524612148067026,0.374435398223903,1.10752224679937,1.73796900436559,1.06978542216572,2.12594743533245,2.17214577823228,1.27443932686253,1.98345180911721,1.53205819298582,0.923939456095321,1.57312028620083,1.84578946776709,0…
ENSG00000014641,206.238820302978,224.934111281554,235.541830834205,208.173949776171,198.121125507008,197.002882133364,200.501680801324,202.475983941247,196.176630446464,192.254922497504,211.181564598281,218.329552252383,206.881510392391,211.954665566013,233.95708631086,225.277846242423,165.307113977878,141.329957089643,142.908963071305,164.17890835116,156.513728773354,160.631626279315,157.3730409…
ENSG00000014824,110.79851516277,110.973782365323,141.207215315406,135.598881432237,127.203746090077,125.346478557814,93.3049283816309,97.8397936387426,125.798885985318,122.234630499617,141.037333331004,145.159249147171,121.75262861492,120.995474286487,135.854899012696,131.381908283383,101.297371012557,112.083058595205,110.913887320113,106.89466207325,111.386308025921,114.966315420921,103.80430534…
ENSG00000014914,1.78264937761882,1.57186660574112,2.18925915217683,2.93049877161451,4.30323904228948,4.38712674952347,2.07830438364711,1.20352857587455,3.6947427682782,4.32033533702257,3.36991858401513,3.76557563911786,1.99076449590967,1.67325412184894,3.25750010252553,4.50884805481548,2.6311005457807,1.4425104066307,1.60331671358981,3.33644803589977,2.34794072567287,1.77387559239954,2.3128089002…
ENSG00000014919,46.211756942888,41.235300623942,49.1179937988392,46.8879803458321,61.1059944005106,56.0925491546216,42.1130098791652,42.5482749470943,64.8001039359562,57.553038596765,53.1698265477942,53.0133982134632,41.5216594861161,42.5719737231075,48.6910541640658,47.0302472286958,42.5087181927694,42.1213038736165,38.1945670437394,41.987915282554,40.1732658162629,38.521865905217,42.65091707294…
ENSG00000015133,66.575097910303,66.3851663157999,56.4155243060954,54.3046747678195,63.5731847847566,65.0757134512649,56.0048339172275,58.6189212249486,54.1066657316125,53.0475460310128,74.2630206477408,71.5459371432394,69.9611522848257,64.9826067977073,66.3844231419939,64.1112117575223,47.4420317161082,51.3894332362187,48.9902329152442,50.2777054025204,51.3025048559523,53.5518658570347,48.7730582…
ENSG00000015153,1.09701500161158,0.681142195821151,3.84523722882342,3.21993074905792,1.26228345240491,1.04455398798178,1.20322885369043,2.4070571517491,0.994738437613363,0.833207529282924,1.99698879052748,2.14120967714545,2.33835829678279,3.78539457074023,0.925815818612519,1.02025028977577,0.781107974528644,1.73101248795684,1.56768745328781,1.052264380553,1.19744977009317,1.58210525808607,0.68023…
ENSG00000015171,27.4253750402896,29.3939055273589,43.7571156185088,38.8200639745971,41.4258478471067,41.3643379240785,38.3939388768493,45.5216984874902,44.0171758643913,42.0306909216053,57.912674925297,54.7854338083422,39.1201023164472,37.5796417530009,41.9017381609073,44.9568353494741,31.3676518192292,25.1718065957057,29.5366567903545,33.8007851021538,31.0867352079089,34.4946888846343,33.3996814…
ENSG00000015285,0.411380625604344,0.26197776762352,0.0561348500558163,0.217073983082556,0.172129561691579,0.52227699399089,0.21876888248917,0.283183194323423,0.284210982175246,0.370314457459077,0,0.147669632906583,0.315994364430107,0.301734349841613,0.240026323343986,0.296201697031674,0.328887568222587,0.865506243978421,1.21139485026786,0.667289607179954,0.680902810445134,0.623253586518756,0.2720…
ENSG00000015413,0.068563437600724,0.157186660574112,0.44907880044653,0.217073983082556,0.286882602819299,1.35792018437631,0,0.212387395742567,0.852632946525739,1.32696013922836,0.374435398223903,0.147669632906583,0.252795491544086,0.219443163521173,0.857236869085666,0.32911299670186,0.0822218920556468,0.28850208132614,0.142517041207983,0.15398990934922,0.140876443540372,0.0958851671567318,0.20407…
ENSG00000015475,14.6040122089542,13.6752394699477,30.1724819050013,29.1602717274234,19.1637578683291,17.9663285932866,23.8458081913195,17.9821328395374,23.0921423017388,22.0954292950583,21.4676294981704,19.3447219107624,27.1123164681032,25.2359638049349,16.6989742097888,17.2126097275073,13.4432793510982,12.1531501758637,12.4702411056985,13.5254470378398,12.6084416968633,13.1602391922614,13.604758…
ENSG00000015479,806.85453368532,759.10677946591,893.133531813065,880.054106413863,717.837648774449,662.978416172036,760.33125109111,750.718648151394,708.289293953486,662.89373838987,732.520450725362,753.927310804559,760.282440818837,829.220854155632,738.218102181812,746.592833018169,696.624980441467,702.322254228323,698.155355617607,747.313030071765,693.652128585537,718.036074253186,705.372702692…
ENSG00000015520,0,0.209582214098816,0.140337125139541,0.18089498590213,0.286882602819299,0,0.109384441244585,0,0.177631863859529,0.370314457459077,0.249623598815935,0,0.221196055101075,0,0.10286842429028,0.098733899010558,0,0.072125520331535,0.106887780905987,0.0256649848915367,0.0234794072567287,0.0719138753675488,0,0,0,0,0.0664716764352888,0,0.0332617595703645,0.12264312491003,0,0.2341842404700…
ENSG00000015532,24.4085837858577,23.0540435508697,27.1412000019872,26.2659519529893,29.7210376520793,31.5455304370497,23.4082704263412,19.6812320054779,24.9395136858779,25.8602929458922,21.3428176987625,19.4923915436689,17.4428889165419,16.5953892412887,23.2482638896033,23.9594261598954,20.8021386900786,26.0733755998499,23.3015362375052,22.9444964930338,23.6202837002691,22.4611004064644,22.413839…
ENSG00000015568,40.9323722476322,48.9898425455982,40.1644852149365,21.6712193110752,28.4587541996744,2.8202957675508,59.3957515958096,2.26546555458738,11.5105447780975,9.93677127515191,15.2270395277721,13.6594410438589,40.5736763928257,90.6848873251247,8.02373709464183,58.9441377093031,22.4465765311916,24.8472417542138,29.8573201330724,40.7303310228687,27.2126330105486,8.4378947097924,11.29194933…
ENSG00000015592,0.205690312802172,0,0.0280674250279081,0.036178997180426,0,0,0.109384441244585,0.141591597161711,0,0,0,0,0,0,0.0685789495268533,0.032911299670186,0.0822218920556468,0.072125520331535,0.0712585206039915,0.102659939566147,0.18783525805383,0.119856458945915,0.0680237911849193,0.0471332852479557,0.0311292428574341,0.0516064534179638,0,0.0292239014340928,0.133047038281458,0.06132156245…
ENSG00000015676,55.4678210189857,56.6919889137296,57.0330076567093,52.6404408975199,59.8437109481057,61.5242298921268,54.5828361810479,52.034911956929,57.8014084998907,57.4296004442786,62.9051469016157,55.8191212386883,59.4701393857461,61.4989465768087,55.0003175205363,53.1517489673504,58.0075448452588,58.9986756311957,55.3322412489994,48.9944561579435,52.194722331708,53.98334910924,54.8271756950…
ENSG00000016082,0.068563437600724,0.104791107049408,0.421011375418622,0.253252980262982,0.114753041127719,0,0.328153323733755,0.212387395742567,0.106579118315717,0.0925786143647694,0,0.147669632906583,0.853184783961289,0.713190281443812,0.240026323343986,0.230379097691302,0.411109460278234,1.00975728464149,0.855102247247898,0.23098486402383,0.892217475755692,0.743110045464671,0.136047582369839,0.…
ENSG00000016391,12.4785456433318,13.4132617023242,14.6511958645681,14.5077778693508,13.8851179764541,15.7727652185249,15.2044373329973,11.1149403771944,15.453972155779,13.238741854162,17.3488401177075,17.6465211323367,15.6101216028473,14.2363752334361,11.3841056214576,14.5797057538924,9.57885042448285,11.7564598140402,9.47738324033087,12.6785025364191,10.2370215639337,11.8178468520672,9.931473512…
ENSG00000016402,0.548507500805792,0.628746642296447,1.29110155128377,1.15772790977363,0.573765205638597,1.04455398798178,0.875075529956679,1.06193697871284,0.852632946525739,1.45039829171472,1.12330619467171,0.590678531626331,1.57997182215053,1.31665898112704,0.994394768139372,2.20505707790246,0.616664190417351,0.649129682983815,0.748214466341911,0.46196972804766,0.657423403188405,0.9348803797781…
ENSG00000016490,0.205690312802172,0,0,0,0,0,0,0,0,0,0,0,0,0,0,0,0,0,0.0356292603019958,0,0,0,0,0,0,0.0258032267089819,0,0,0.0332617595703645,0,0.036217748638104,0,0,0,0,0.0343258480672745,0,0,0.117647328720342,0,0.10137771812037,0.161806834353921,0,0,0,0
ENSG00000016602,0,0,0,0,0,0,0,0,0,0,0,0,0,0,0,0,0,0,0,0,0.0234794072567287,0.0239712917891829,0,0,0,0,0.0332358382176444,0.0292239014340928,0,0,0,0,0,0,0,0,0,0,0,0,0,0,0,0,0,0
ENSG00000016864,26.6711772266816,27.1408967257966,23.0152885228847,23.2992741841944,25.9341872948646,23.6069201283882,20.6736593952266,20.7431689841907,25.4013565319127,24.4407541922991,30.3292672561362,25.9160205751053,19.6864489039957,21.8345947703567,26.7457903154728,29.3239680061357,23.6799049120263,22.647413384102,20.9500050575735,23.6631160699968,22.8219838535403,23.3959807862425,23.6382674…
ENSG00000017260,147.274263966355,148.855767563684,152.29384820143,148.152993453845,157.72805503005,171.202398630214,154.560215478598,150.299480387157,161.680522484943,162.938361281994,182.474850734449,178.311081734699,133.444420098834,132.653392348549,163.766531470126,166.498265031471,151.411614220474,109.991418505591,110.735741018603,149.524201978093,120.895467964896,128.006698154237,153.0535301…
ENSG00000017427,0,0.0523955535247039,0,0,0.114753041127719,0,0,0,0,0.0308595381215898,0,0,0,0,0,0,0,0.0360627601657675,0,0,0.0234794072567287,0.0239712917891829,0.0340118955924597,0.0942665704959114,0.0933877285723024,0,0.0332358382176444,0,0,0,0,0,0.041781044015536,0,0,0,0,0.0312234951555498,0.117647328720342,0.0414970096009971,0,0.269678057256535,0.102126675681729,8.69454551986312,5.80484438676…
ENSG00000017483,9.53031782650063,5.76351088771743,11.6479813865819,12.6626490131491,20.2539117590425,23.8158309259846,12.907364066861,12.6724479459732,20.8539808171087,24.8110686497582,14.4781687313243,14.9146329235649,9.51143036934622,10.7801454079776,12.3099214400702,12.3417373763197,22.7754640994142,13.1268447003394,11.2944755157327,16.9902199981973,13.2893445073085,12.32124397964,20.271089773…
ENSG00000017797,150.496745533589,148.59378979606,134.162291633401,125.613478210439,147.629787410811,152.087060650147,108.837519038362,116.67147606125,145.693654737586,134.887041129469,175.735013566419,167.235859266705,149.180939447454,148.124135376792,135.786320063169,136.121135435889,146.478300697135,131.376635283891,120.818821684068,132.662306904353,126.671402150052,130.571626375679,140.7072120…
ENSG00000018189,34.3502822379627,35.5241852897492,34.9439441597456,35.6363122227196,34.6554184205713,34.3658262046006,24.502114838787,23.5042051288441,30.6237333293828,29.8720329016989,44.3081887898285,41.8643409290162,31.6310358794537,29.4053839118372,33.8780010662655,35.5771149434711,29.0654388416711,28.3092667301275,28.6815545431066,30.4643370662541,31.3215292804761,31.6660764535107,29.3182540…
ENSG00000018236,46.3488838180894,47.4703714933817,50.9423764256533,52.3510089200765,28.5161307202383,23.8158309259846,20.8924282777157,24.3537547118144,30.2684696016637,28.4216346099842,36.0706100289027,39.280122353151,17.0952951156688,16.3210852868872,42.8618434542833,41.4682375844344,17.8010396300475,22.2507230222786,22.2326584284453,23.7914409944545,23.1741749623913,25.0020573361178,17.6521738…
ENSG00000018280,0.137126875201448,0.157186660574112,0.112269700111633,0.036178997180426,0.459012164510878,0,0,0.0707957985808557,0.106579118315717,0.0308595381215898,0,0.221504449359874,0.0947983093290321,0.16458237264088,0.240026323343986,0.32911299670186,0.24666567616694,0.216376560994605,0.142517041207983,0.102659939566147,0.258273479824016,0.431483252205293,0.170059477962298,0.282799711487734…
ENSG00000018408,47.5144622573017,53.967420130445,58.6889857333559,57.3075315337948,29.7210376520793,30.7098872466643,34.2373301095551,38.8668934208898,30.0553113650323,30.4892236641307,30.7037026543601,34.0378503849673,69.4555613017375,66.1895441970738,33.192211570997,31.85813808074,33.6287538507595,66.1751649041834,62.7431273918145,29.4890676403757,62.9482908552898,53.9114352338724,30.9508249891…
ENSG00000018510,112.306910789986,110.764200151224,108.901609108284,114.361810087327,129.613559953759,121.690539599877,109.165672362096,113.34407352795,124.839673920477,120.907670360389,143.533569319163,128.694085078087,101.560588727836,106.56708628497,124.265056542658,125.161672645717,139.859438386655,96.5039462035939,92.9211108676049,127.375320016697,102.158900974027,107.535214966275,133.7347734…
ENSG00000018607,0.274253750402896,0.366768874672927,0.0842022750837244,0.217073983082556,0.401635643947018,0.208910797596356,0.21876888248917,0.212387395742567,0.177631863859529,0.185157228729539,0.124811799407968,0.369174082266457,0.126397745772043,0.109721581760586,0.582921070978253,0.526580794722976,0.0822218920556468,0.108188280497303,0.178146301509979,0.256649848915367,0.18783525805383,0.263…
ENSG00000018610,23.5172590970483,20.0674969999616,23.8853786987498,25.4700140150199,31.901345433506,30.1876102526734,46.0508497639702,47.8579598406585,24.903987313106,26.1380287889866,20.8435705011306,25.6206813092921,54.8250222286236,57.1649440972655,22.6310533438616,23.2353775671513,47.1542550939134,54.3465795698117,47.4938039825603,43.7587992400701,42.8968770580434,45.1619137308207,47.07246349…
ENSG00000018625,13.0270531441376,13.098888381176,14.5950610145122,13.7118399313815,37.6963740104558,41.8866149180694,18.8141238940686,18.1945202352799,50.3053438450186,52.2760575779731,15.601474925996,16.1698248032708,12.3237802127742,12.6179819024674,29.0431851246224,31.6277589830487,19.8154759854109,14.1005392248151,14.8217722856302,22.2515419009623,18.8070052126397,16.5881339181146,16.90391210…
ENSG00000018699,44.4291075652691,36.8864696813915,40.5293617402994,39.5074649210252,32.6472402008362,30.9187980442607,32.4871790496417,27.0439950578869,37.1250595466416,38.4818440376225,43.1848825951568,39.5016268025109,36.0549569814752,37.9088064982826,39.3986065031772,36.3669861355555,34.8209712855664,27.8043880878068,26.4012818837789,29.1040928670026,28.7153150749793,30.131913779003,32.8214792…
ENSG00000018869,5.96501907126299,5.29195090599509,9.62712678457249,11.1069521343908,4.81962772736422,4.07376055312894,7.54752644587636,9.55743280841553,6.89211631774973,6.48050300553386,3.869165781647,4.20858453783761,2.40155716966881,2.16700123977158,5.93207913407281,5.52909834459125,4.72775879319969,11.5400832530456,12.1139485026786,5.54363673657193,12.4206064388095,11.8897607274347,5.816034146…
ENSG00000019102,0,0,0.168404550167449,0.0723579943608521,0.114753041127719,0,0,0.0707957985808557,0.0355263727719058,0,0,0,0.0315994364430107,0.0274303954401466,0.0342894747634266,0,0.0822218920556468,0.0360627601657675,0.0356292603019958,0,0,0,0.0680237911849193,0,0.0311292428574341,0.0516064534179638,0,0.20456731003865,0.0332617595703645,0.0919823436825223,0.072435497276208,0.0390307067450096,0…
ENSG00000019144,69.1805085391305,71.1007661330232,60.9063123105607,61.14250523492,53.9339293300281,57.2415585414015,59.833289360788,54.8667439001632,63.5566808889395,63.3546317636238,64.7773238927352,66.894343706682,43.3228273633677,45.1504308944813,70.4648706388417,70.6934716915595,61.2964205274847,48.3601613822943,47.1018821192384,63.4181776669872,48.4849759851449,48.5178945813063,58.5004604190…
ENSG00000019169,0,0,0,0.108536991541278,0,0,0,0,0,0,0,0,0,0,0,0,0,0,0,0,0,0.0239712917891829,0,0,0,0,0,0,0,0,0,0,0,0,0,0,0,0,0,0,0,0,0,0,0,0.109250890135284
ENSG00000019186,0.274253750402896,0.366768874672927,0.168404550167449,0.144715988721704,0.114753041127719,0,0.328153323733755,0.283183194323423,0.142105491087623,0.123438152486359,0.124811799407968,0,0.0947983093290321,0.0274303954401466,0.137157899053707,0.197467798021116,0.24666567616694,0.108188280497303,0.0356292603019958,0.0513299697830734,0.0469588145134575,0.0719138753675488,0.034011895592…
ENSG00000019485,11.175840328918,12.3653506318301,15.5493534654611,17.3659186466045,13.7129884147625,12.1168262605886,15.9701284217094,11.3981235715178,16.1644996112171,15.6149262895244,20.2195115040908,15.5053114551912,13.5877576704946,11.6579180620623,13.9215267539512,17.0809645288265,11.0177335354567,12.1531501758637,8.15910060915703,10.7792936544454,12.0918947372153,11.0507655148133,11.0878779…
ENSG00000019505,28.9337706675055,32.4852431853164,20.6014899704846,19.6813744661518,29.2620254875685,20.6821689620392,13.7824395968177,15.0087092991414,21.4579291542311,22.2497269856662,23.8390536869218,22.3719493853473,19.3388551031225,20.57279658011,29.0774745993858,26.0657493387873,27.9965542449477,29.3911495351005,23.9784921832431,25.1003552239229,23.8550777728364,23.6596649959236,26.49526666…
ENSG00000019549,1.50839562721593,1.10030662401878,0.982359875976785,1.15772790977363,0.459012164510878,0.104455398798178,0.765691088712094,0.920345381551125,0.42631647326287,0.524612148067026,0.249623598815935,0.221504449359874,0.379193237316128,0.521177513362786,0.514342121451399,0.296201697031674,0.24666567616694,0.360627601657675,0.605697425133928,0.718619576963027,0.281752887080745,0.62325358…
ENSG00000019582,13.2327434569397,14.2515905587195,24.1941203740568,21.6350403138948,19.7948995945316,25.4871173067554,19.9079683065145,17.8405412423756,23.5184587750016,27.0329553945127,17.2240283182995,16.3913292526307,16.9372979334537,17.2537187318522,24.0712112839255,25.6049911434047,13.8543888113765,18.1395683633811,18.7409909188498,15.0910111162236,18.5722111400724,16.9477032949523,13.536734…
ENSG00000019991,0.411380625604344,0.314373321148223,0.0561348500558163,0.18089498590213,0.229506082255439,0.104455398798178,0.109384441244585,0,0.42631647326287,0.802347991161334,0.499247197631871,0.295339265813166,0.0315994364430107,0.0548607908802932,0.342894747634266,0.49366949505279,0.164443784111294,0.0360627601657675,0.142517041207983,0.15398990934922,0.0704382217701862,0.119856458945915,0.…
ENSG00000019995,57.867541335011,57.2159444489767,36.9367313367271,40.086328875912,47.2208764240565,49.0940374351436,39.8159366130289,37.309385852111,48.5290252064233,47.2150933260324,58.4119221229289,51.4628670679441,35.486167125501,38.6494271751666,47.902396244507,46.2732873362815,56.9386602485354,40.5706051864885,39.5841081955173,49.5590858255574,42.5212065419358,44.4667462689344,54.18094967878…
ENSG00000020129,23.3801322218469,21.4821769451286,41.5117216162761,36.2151761776065,26.2210698976839,30.2920656514716,33.0341012558646,30.5129891883488,32.3289992224343,35.8587832972873,26.8345368727131,29.6077613977699,27.3335125232043,25.071381432294,23.385421788657,25.835370241096,27.00989154028,20.014831892001,20.8431172766675,19.6337134420256,19.7931403174223,21.5741626102646,23.910362601499…
ENSG00000020181,6.5820900096695,5.76351088771743,2.91901220290245,3.58172072086218,4.59012164510878,4.59603754711983,8.53198641707762,7.78753784389413,3.62369002273439,3.9191613414419,2.74585958697529,4.43008898719749,7.99465742008171,6.66558609195563,4.14902644637462,3.98226726009251,10.1544036688724,10.8909535700618,9.37049545942488,7.21186075452181,10.0257068986232,7.45507174643589,10.33961626…
ENSG00000020219,0,0,0,0,0,0.104455398798178,0,0,0.106579118315717,0.0308595381215898,0.124811799407968,0.147669632906583,0,0,0,0,0,0,0,0.0256649848915367,0,0.0239712917891829,0,0.0471332852479557,0,0,0,0.0292239014340928,0.0332617595703645,0.0919823436825223,0.108653245914312,0,0,0.101105988295364,0,0,0,0,0,0.0414970096009971,0.152066577180555,0,0.102126675681729,0,0,0.163876335202926
ENSG00000020256,25.5055987874693,25.2022612453826,20.0962763199822,17.0041286748002,26.16369337712,26.1138496995445,24.1739615150533,23.6457967260058,27.2487279160518,27.6192866188229,24.7127362827776,27.6880561699843,16.8424996241247,18.5978081084194,22.4938954448079,23.8277809612147,23.8032377501097,18.1756311235468,15.3562111901602,20.7373077923616,17.7034730715735,17.954497550098,23.332160376…
ENSG00000020426,30.7849834827251,32.7472209529399,29.1339871789686,25.3252980262982,33.1636288859109,31.6499858358479,26.7991881049233,27.1147908564677,32.6842629501533,31.291571655292,26.2104778756732,34.9238681824068,29.482274201329,31.5449547561686,30.2776062161057,30.5087747942624,34.2865289872047,31.6631034255439,31.1043442436423,32.6715257669262,32.6598554941097,30.9948802834135,35.88254985…
ENSG00000020577,11.7243478297238,14.3039861122442,11.7041162366377,11.7943530808189,19.4506404711484,16.2950422125158,38.6127077593385,37.9465480393387,19.7171368884077,18.1454084154948,9.36088495559758,7.97416017695547,43.9232166557849,36.5098563308351,17.0761584321865,17.6404566232197,17.9654834141588,26.6503797625022,33.0995828205541,16.7079051643904,27.9404946355072,22.9405262422481,20.951327…
ENSG00000020633,1.16557843921231,1.20509773106819,0.75782047575352,0.397968968984686,1.60654257578807,1.35792018437631,1.4219977361796,1.2743243744554,0.746053828210022,0.493752609945437,0.748870796447806,0.738348164532914,2.14876167812473,1.75554530816938,0.685789495268533,0.756959892414278,1.56221594905729,0.613066922818048,1.7102044944958,1.10359435033608,1.43224384266045,1.07870813051323,1.73…
ENSG00000020922,78.7108263656311,84.1472589606745,75.1084293746822,73.624259262167,65.1797273605446,62.9866054753013,57.8643694183854,58.5481254263677,64.9777357998157,63.2311936111375,70.7682902643177,72.7272942064921,52.7394594233849,49.5118637694646,77.4942129653442,82.3111604751352,73.4241496056926,66.7521690668357,68.1231456974159,76.9949546746101,65.9301755768943,67.8627270551769,79.8599308…
ENSG00000021300,7.67910501128109,9.01203520624907,15.5212860404332,16.642338702996,13.0244701679962,16.5039530101121,12.4698263018827,12.8848353417157,13.3223897894647,11.9735007911768,14.2285451325083,11.2967269173536,19.7180483404387,18.4606561312187,23.5568691624741,22.9062645704495,9.90773799270544,13.2350329808367,12.8621629690205,9.59870434943472,12.373647624296,12.4171291467968,8.060819255…
ENSG00000021355,19.129199090602,18.757608161844,24.1941203740568,20.4049544097603,15.549037072806,14.6237558317449,10.7196752419693,11.1857361757752,8.84606682020454,7.00511515360088,10.9834383479012,11.2967269173536,12.8925700687484,11.7676396438229,14.3330004511123,13.098697268734,12.6621713765696,19.9787691318352,18.5628446173398,13.6024419925144,18.2200200312215,17.3791865471576,11.9381753529…
ENSG00000021461,0,0,0,0,0,0,0,0,0,0,0,0,0,0,0,0,0,0,0,0,0,0,0,0,0,0,0,0,0,0,0,0,0,0,0,0,0,0,0.294118321800856,0,0.253444295300925,0,0,0,0,0
ENSG00000021488,0,0.0523955535247039,0.0561348500558163,0.0723579943608521,0.0573765205638597,0,0,0,0.0355263727719058,0,0,0,0,0,0.137157899053707,0.065822599340372,0.0411109460278234,0.14425104066307,0.106887780905987,0,0.0469588145134575,0,0.102035686777379,0.0471332852479557,0,0.0258032267089819,0,0.0584478028681856,0.066523519140729,0,0,0.156122826980038,0.041781044015536,0.0337019960984547,0…
ENSG00000021574,79.8764048048434,76.9166725742653,73.7611929733426,77.9657389238181,83.0812017764689,75.6257087298808,81.2726398447266,80.3532313892713,86.8619814273097,83.7836460001163,100.223874924598,99.3816629461303,75.9966446454407,77.6280190956149,89.3926607082532,84.4174836540271,88.1007573376255,66.860357347333,65.3440633938602,83.8475056406504,68.2546368953105,73.903492586051,87.07045271…
ENSG00000021645,10.7644597033137,9.74557295559493,7.60627218256311,7.9232003825133,5.96715813864141,5.01385914231254,5.14106873849549,4.60172690775562,4.58290208757585,4.62893071823847,12.4811799407968,9.00784760730155,7.42586756410751,6.39128213755416,7.78371077129784,8.06326841919557,8.13996731350903,5.04878642320745,6.44889611466123,7.85348537681023,5.42374307630434,6.56813395023613,7.82273598…
ENSG00000021762,6.37639969686733,7.33537749345855,7.60627218256311,6.62075648401796,7.63107723499334,7.1029671182761,4.81291541476174,3.6813815262045,3.97895375045345,4.62893071823847,5.61653097335855,8.12182980986206,8.46864896672687,7.07704202355783,8.74381606467379,8.52402661457817,5.71442149786745,8.5468741592869,5.77194016892331,6.46757619266725,7.56036913666666,7.35918657927916,5.2718438168…
ENSG00000021776,201.919323734132,206.752854208482,186.816780985757,191.459253078815,181.539311064052,184.154868081188,177.312179257472,175.219601487618,189.177935010398,173.183727938362,200.82218524742,192.635036126637,193.64134652277,183.125319958419,180.191189881807,178.346332912738,191.741452273768,206.134737107527,183.455061294976,182.452377593934,188.469202049762,191.218994602312,191.2148770…
ENSG00000021826,20.5690312802172,22.0061324803756,46.8164649465508,44.6087035234653,34.368535817752,33.9480046094078,21.1111971602049,27.2563824536295,53.8935074949811,50.3627662144345,56.9141805300333,54.2685900931692,32.9898116465032,30.9689164519255,68.8532653249607,71.8124558803458,28.859884111532,29.0665846936086,29.3228812285425,32.6971907518178,27.5648241193995,33.8954065899047,29.59034916…
ENSG00000021852,0,0,0,0,0,0,0,0,0,0,0,0,0,0,0,0,0,0,0,0.0256649848915367,0,0,0,0,0,0,0,0,0,0,0,0,0,0,0,0,0,0,0.0588236643601712,0.0414970096009971,0,0,0.0510633378408644,0.143316684393348,0,0
ENSG00000022267,69.4547622895334,62.7174775690706,70.3931019699936,70.7661184849133,91.6876798610478,98.3969856678836,126.667182961229,114.052031513759,60.9632556765904,57.398740906157,51.4224613560827,52.4227196818369,105.921310956972,106.210491144248,79.6201604006766,76.1896587364806,121.359512674135,139.671070122018,125.771288866045,127.477979956263,122.867738174462,121.126937410741,123.531204…
ENSG00000022277,52.4510297645538,52.5003446317533,45.6657005204065,43.6680495967742,44.4668034369913,43.5579012988402,49.551151883797,50.4066085895693,41.5658561431298,40.2716972486747,44.6826241880524,47.5496217959197,46.2931743890107,44.4646710084777,39.6386328265212,44.4302545547511,43.9064903577154,46.8815882154978,44.0377657332667,38.9081170955696,45.2213383764596,42.5490429257997,46.5282731…
ENSG00000022355,0.548507500805792,0.576351088771743,0.842022750837244,0.470326963345538,0.401635643947018,0.417821595192712,0.875075529956679,0.0707957985808557,0.639474709894304,0.740628914918155,0.748870796447806,0.738348164532914,0.189596618658064,0.329164745281759,1.0286842429028,1.21771808779688,1.02777365069558,0.649129682983815,0.320663342717962,0.590294652505344,0.328711701594202,0.575311…
ENSG00000022556,240.794792853743,228.23503115361,276.492203949923,250.684271463172,147.572410890247,148.117755495816,110.150132333297,103.220274330888,140.719962549519,143.928885799095,271.964910909962,265.879174048302,251.05752253972,245.14544404859,254.87366591655,249.171449802978,141.586098119824,159.649839253853,137.386427724496,141.337071797693,137.284094230093,160.823396613628,143.258104235…
ENSG00000022567,24.2714569106563,26.4073589764508,24.6993340245592,22.6480522349467,26.6800820621948,25.6960281043518,17.5015105991336,20.3891899912865,26.0763576145789,25.6442761790411,30.828514453768,28.0572302522507,18.6752669378193,17.7200354543347,22.7682112429153,24.3543617559376,28.7365512734486,21.3491540181344,22.6245802917673,25.151685193706,20.1218520190165,22.1974161967834,28.87609935…
ENSG00000022840,147.068573653553,151.213567472295,139.158293288369,136.792788339191,157.613301988923,159.503393964818,126.229645196251,129.556311402966,152.372612818704,151.366034486398,172.115471383587,151.87821744442,139.353514713677,141.732853239238,147.890504654659,145.632501040573,158.153809369037,157.88276400573,144.868572387915,148.523267567323,145.173175068354,147.783013880313,155.2643033…
ENSG00000022976,8.63899313769122,9.69317740207022,9.17804798412596,7.48905241634819,9.58187893416457,9.81880748702873,4.48476209102798,4.3185437134322,10.196068985537,8.11605852597812,9.61050855441351,9.89386540474105,4.86631321222365,5.07462315642712,10.0811055804474,11.4202209855545,4.11109460278234,3.57021325641098,4.13299419503151,4.87634712939197,5.23590781825051,5.80105261298227,3.775320410…
ENSG00000023041,33.8017747371569,28.3459944568648,30.846100105671,32.8143504426464,26.9669646650141,30.6054318478661,43.0974698503665,41.698725364124,34.709266198152,35.056435306126,45.1818713856843,39.6492964354175,33.4638031931483,38.6494271751666,36.7583169463933,38.0783737184052,32.9709787143144,24.0177982704012,25.6530674174369,34.6477296035745,25.2168833937267,29.1011482320681,34.4540502351…
ENSG00000023171,27.2882481650881,32.1708698641682,24.9238734247824,24.4931810911484,26.9669646650141,29.8742440562789,18.9235083353132,19.610436206897,27.5684652709989,27.1255340088774,30.953326253176,31.0106229103824,27.7443051969634,24.9067990596531,29.3175009227298,34.3923081553444,32.9709787143144,21.096714696974,21.6982195239154,34.8273844978153,22.1176016358385,21.622105193843,32.2772889172…
ENSG00000023191,17.895057213789,17.342928216677,20.2646808701497,16.6061597058155,16.753944004647,22.5623661404064,15.8607439804648,14.229955514752,17.0881853032867,17.9293916486437,13.7292979348764,14.0286151261254,16.4001075139226,15.909629355285,12.6871056624679,13.987302359829,20.3910292298004,21.9982837011182,20.0592735500236,18.0168193938588,19.7227020956521,20.0399999357569,20.747256311400…
ENSG00000023228,158.450104295273,160.95914042789,152.321915626457,148.225351448205,160.367374975988,154.698445620102,145.590691296543,142.370350946101,162.284470822066,154.853162294138,181.850791737409,164.20863179212,157.365193486193,156.380684404276,158.828847104192,150.865397688133,155.604930715312,141.18570604898,136.424437696342,150.679126298212,142.566960862857,145.601626327497,170.53564450…
ENSG00000023287,184.161393395545,194.387503576651,143.508744167694,149.45543735234,218.145531183795,196.480605139373,168.452039516661,174.016072911743,205.839803840422,191.452574506343,257.985989376269,241.882858700983,231.876664618812,224.133761141438,211.360322441762,222.447474470787,208.720272983259,172.704558433861,166.816196733944,210.298886201252,183.468088304078,193.256554404393,208.526931…
ENSG00000023318,42.8521485004525,44.9553849241959,38.3401025881225,41.2078777885053,48.1962772736422,50.1385914231254,42.6599320853881,43.1146413357411,44.7277033198294,46.0732904155336,54.293132742466,52.93956339701,42.4064437065204,41.5844794872623,47.182317274475,45.2530370465057,53.1975641600035,42.4458687151084,43.0401464448109,48.5068214450043,46.5596645900931,48.3261242469928,52.0382002564…
ENSG00000023330,34.5559725507649,33.5855498093352,30.9022349557269,25.9403409783655,40.6799530797765,36.2460233829677,33.6904079033322,31.5041303684808,40.1448012322536,39.9322423293372,34.822492034823,31.9704755242752,24.9003559170924,28.4727504668722,40.3930012713166,37.4530590246717,35.8076339902342,22.3589113027759,21.5200732224054,32.851180661167,26.3673743493064,24.4267463331774,34.86219298…
ENSG00000023445,0.205690312802172,0.209582214098816,0.168404550167449,0.0723579943608521,0.459012164510878,0.104455398798178,0.109384441244585,0.283183194323423,0.142105491087623,0.277735843094308,0.249623598815935,0.443008898719749,0.0631988728860214,0.356595140721906,0.582921070978253,0.65822599340372,0.205554730139117,0.0360627601657675,0.0356292603019958,0.205319879132294,0.234794072567287,0.…
ENSG00000023516,111.278459225975,115.95135995017,120.8863995952,130.280568846714,125.826709596544,123.361825980648,128.526718462387,135.927933275243,124.662042056617,119.58071022116,152.520018876537,128.620250261634,182.265549403286,157.807064967163,110.514977162524,114.004742057524,131.637249181091,117.997351262391,108.669243921087,127.323990046914,111.221952175124,118.585980481088,136.421713221…
ENSG00000023572,21.0489753434223,21.7441547127521,18.7490399186426,18.9216155253628,23.3522438694909,21.6222675512228,22.6425793376291,25.4864874891081,24.8329345675622,21.6016766851129,27.9578430673848,25.6945161257454,22.3408015652086,21.8620251657969,22.2538691214639,20.2075379974942,21.9121342328299,15.9036772331035,16.496347519824,21.5585873088908,18.1261024021946,19.7523444342867,20.4411492…
ENSG00000023608,27.2882481650881,30.7561899190012,8.13955325809336,8.53824333458054,15.8359196756253,13.8925680401577,15.8607439804648,14.3007513133329,15.1342348008319,16.1703979757131,17.0992165188916,12.8472580628727,10.7438083906236,11.2738925259003,18.5163163722504,19.4176668054097,19.6921431473274,14.5332923468043,14.6079967238183,20.0700181851817,17.3278025554658,14.7183731585583,19.896958…
ENSG00000023697,8.70755657529194,10.269528490842,18.3841633932798,16.389085722733,12.3359519212298,13.1613802485704,10.6102908007247,11.1149403771944,14.8500238186566,14.9051569127279,15.1022277283641,12.921092879326,9.79582529733332,10.2315374991747,18.242000574143,16.817674131465,8.67440961187074,12.6580288181844,10.6531488302967,9.75269425878394,11.8336212573913,12.4650717303751,9.591354557073…
ENSG00000023734,253.753282560279,235.465617540019,276.716743350146,266.67538821692,255.784528673687,243.903356193746,245.896223917827,237.44910844019,285.099141494544,268.07680766225,265.225073741931,266.174513314116,242.272879208563,244.541975348907,257.925429170495,246.01196503464,274.168899059554,239.673104061691,229.915616728779,253.416060819033,245.336326425559,247.695358057627,279.611793665…
ENSG00000023839,1.30270531441376,0.995515516969374,0.926225025920969,1.19390690695406,0.745894767330176,0.313366196394534,1.53138217742419,0.637162187227702,0.888159319297645,0.956645681769283,0.748870796447806,1.47669632906583,0.758386474632257,0.740620676883959,1.16584214195651,1.38227458614781,1.43888311097382,0.685192443149583,0.748214466341911,1.02659939566147,0.633943995931676,1.03076554693…
ENSG00000023892,2.81110094162968,3.82487540730338,2.4137985524001,2.42399281108854,3.04095558988457,3.76039435673441,0.875075529956679,0.920345381551125,1.8118450113672,2.00586997790334,2.62104778756732,1.77203559487899,1.4851735128215,2.13957084433144,3.25750010252553,3.58733166405027,1.9322144633077,2.81289529292987,2.56530674174369,2.0275338064314,2.86448768532091,2.27727271997238,1.8706542575…
ENSG00000023902,18.5806915897962,13.6752394699477,26.1307727009825,24.6378970798701,21.286689129192,22.5623661404064,24.2833459562979,23.9289799203292,19.9302951250392,20.4907333127356,22.0916884952103,23.1102975498802,18.1696759547312,16.5953892412887,24.4141060315598,24.8480312509904,16.9788207094911,23.8374844695723,21.8051073048214,19.2744036535441,23.1272161478778,21.4543061513187,19.2847448…
ENSG00000023909,29.3451512931099,33.9523186840081,36.4876525362806,38.0964840309886,41.8848600116176,35.5148355913805,50.3168429725091,50.3358127909884,39.4342737768154,40.8580284729849,51.0480259578588,42.3811846441893,56.5629912329891,54.1201702034093,35.8325011277808,32.7796544715053,37.0409623710689,32.420421389025,30.9261979421323,31.5679314165901,30.2179971394099,32.8646410429698,36.0185974…
ENSG00000024048,74.1170760463826,74.5588726656537,65.2848306149143,65.1583739219473,81.7041652829362,81.3707556637806,83.02279090464,83.7514297211523,81.5330255115238,75.9453233172325,90.4885545707766,88.8971190097629,75.6490508445676,74.1443588747163,74.9567918328506,76.8149734302141,82.4685577318137,64.5523406967239,65.1302878320482,80.5110576047506,66.8928312744202,74.694545215094,84.383512964…
ENSG00000024422,13.7812509577455,13.7800305769971,12.3496670122796,12.1923220498036,18.1309804981797,22.9801877355992,14.0012084793069,13.4512017303626,12.4697568429389,12.3129557105143,9.73532035382148,10.3368743034608,15.7997182215053,14.5655399787179,15.2245267949614,14.2176814575203,15.2932719223503,17.8150035218892,15.4987282313682,13.9874167658875,17.5625966280331,14.0711482802504,13.026556…
ENSG00000024526,99.0056038954454,98.6608272870175,66.6601344412818,64.9051209416843,115.671065456741,109.573713339289,87.2887841131788,83.4682465268289,112.831759923573,105.78649668081,56.5397451318094,57.8864960993805,61.2713072629977,66.9027344785176,62.9554756656513,61.7086868815987,99.6529331714439,71.0075747663963,74.1444906884532,107.279636846623,87.3199155877742,74.8623442576183,97.9202474…
ENSG00000024862,8.91324688809412,9.53599074149611,9.17804798412596,9.94922422461716,10.5572797837502,8.14752110625788,7.32875756338719,9.69902440557724,9.1658041751517,10.1219285038815,7.738331563294,6.64513348079623,11.4389959923699,11.5481964803017,10.766895075716,10.5316158944595,8.01663447542556,7.96986999663462,8.372876170969,7.31452069408796,8.71086009224637,7.79066983148446,6.6323196405296…
ENSG00000025039,29.6879684811135,34.1619008981069,46.4796558462159,49.5652261371837,26.7374585827586,26.7405820923336,35.1124056395118,32.8492505415171,23.5539851477735,22.7126200574901,41.0630820052214,41.2736623973899,22.7199948025247,21.4779996296348,38.7813959574355,37.2555912266505,25.6532303213618,29.9681536977528,26.5437989249868,26.255279544042,27.095235974265,31.2106219095162,25.47490979…
ENSG00000025156,17.5522400257853,20.7486391957827,14.6511958645681,13.4585869511185,21.688324773139,23.9202863247828,18.3765861290903,18.1945202352799,24.1934598576679,23.4223894342867,20.5939469023147,19.6400611765755,17.0952951156688,17.2537187318522,20.8480006561634,21.3594334859507,23.5976830199706,12.6219660580186,14.0735578192883,22.2515419009623,15.6372852329813,16.5641626263254,22.1417440…
ENSG00000025293,201.782196858931,215.817284968255,110.417250059791,109.152034493345,152.392038617611,143.3128071511,99.1023037675939,95.6451238827361,132.548896811981,128.622554890786,145.904993507914,132.016651818485,75.9334457725547,80.3984890350697,157.525847063182,158.731198309307,161.360463159207,126.61635094201,124.524264755475,147.009033458722,130.099395609534,126.328707728994,159.95794497…
ENSG00000025423,3.22248156723403,3.24852431853164,2.77867507776291,3.00285676597536,2.12293126086281,2.61138496995445,3.17214879609296,2.76103614465337,2.34474060294578,3.27111104088852,1.99698879052748,2.95339265813166,2.43315660611182,2.19443163521173,3.2232106277621,2.40252487592358,3.41220852030934,2.84895805309563,2.38716044023372,2.74615338339443,2.79404946355072,2.39712917891829,2.99304681…
ENSG00000025434,4.25093313124489,5.65871978066802,7.12912595708867,6.15042952067243,5.79502857694983,5.32722533870708,5.68799094471842,4.46013531059391,6.96316906329354,6.41878392929068,5.49171917395058,5.61144605045015,6.22508897927311,5.73295264699064,8.09231604416868,7.89871192084464,5.42664487567269,7.57317963481118,4.66743309956144,5.28698688765656,5.82289299966873,6.20856457339838,5.4419032…
ENSG00000025708,1.16557843921231,1.15270217754349,0.392943950390714,0.868295932330225,0.229506082255439,1.14900938677996,1.53138217742419,0.849549582970269,0.603948337122399,1.04922429613405,0.873682595855774,2.80572302522507,1.10598027550537,0.932633444964985,1.5430263643542,1.74429888251986,1.56221594905729,0.901569004144188,2.35153117993172,0.898274471203784,1.17397036283644,1.58210525808607,1…
ENSG00000025770,35.6529875523765,28.8175544385871,37.0209336118108,31.4757275469706,31.2702037073035,35.0970139961878,31.3933346371959,32.8492505415171,33.0750530506443,35.210732996734,35.0721156336389,32.4134844229949,33.4322037567053,38.1282496618038,37.9241590883499,33.3720578655686,35.6020792600951,33.971120076153,29.0022178858245,28.3341433202565,30.2649559539234,27.8546410590306,30.84878930…
ENSG00000025772,33.3903941115526,30.6513988119518,24.5870643244475,21.7073983082556,26.9669646650141,28.7252346694989,32.4871790496417,31.0085597784148,28.9895201818751,29.6560161348478,23.090182890474,29.5339265813166,22.2144038194365,23.4255577058852,27.8430535079024,29.027766309104,29.3121045178381,26.0373128396842,22.0545121269354,24.8437053750075,23.1037367406211,22.7487559079346,30.13453949…
ENSG00000025796,151.319506784798,149.379723098931,131.271346855526,133.391962604231,154.113334234527,151.460328257358,146.028229061521,138.830561017058,171.095011269498,169.202847520677,156.638808256999,148.186476621756,148.738547337251,149.166490403517,137.466504326577,139.675555800269,165.84155627624,142.592153695445,138.526564054159,145.212484516315,150.00993296324,147.375501919897,166.3521813…
ENSG00000025800,312.992092647305,302.479530498116,269.363077992834,267.796937129513,287.513744545501,295.399867801247,257.709743572242,252.811796732236,297.88863569243,301.219951604838,319.643018283805,290.761507193062,293.337568500468,282.697655406151,261.457245071128,267.733422816963,282.391088265119,256.694726859933,235.402522815286,248.84769350834,240.757842010497,239.065693013521,263.4901551…
ENSG00000026025,161.535458987306,168.137331260775,140.365192564569,138.239948226408,137.474143271008,147.90884469822,94.617541676566,90.7602137806571,114.963342289887,107.823226196835,100.972745721046,91.4813375856281,52.2338684402967,50.7736619597114,159.343189225644,156.657786430085,155.399375985172,119.656238230017,108.063546495953,108.793870955224,122.327711807557,106.096937458924,141.1493667…
ENSG00000026036,4.25093313124489,5.29195090599509,2.91901220290245,5.10123860244007,4.18848600116176,3.65593895793623,4.15660876729423,5.16809329640247,5.89737788013636,5.15354286630549,3.74435398223903,2.87955784167837,3.66553462738924,3.48366022089862,5.17771068927742,5.3974531459105,5.50886676772833,2.12770284978028,3.13537490657563,3.79841776394743,3.09928175788819,3.64363635195581,4.01340367…
ENSG00000026103,6.23927282166588,5.92069754829154,3.67683267865597,3.69025771240346,4.9917572890558,5.84950233269797,8.09444865209928,7.15037565666643,4.54737571480394,3.30197057901011,4.36841297927887,2.73188820877178,6.69908052591827,4.8277495974658,7.50939497319043,6.74681643238813,4.60442595511622,4.3275312198921,3.70544307140756,4.87634712939197,4.414128564265,3.88334926984764,5.645974668348…
ENSG00000026297,16.7980422121774,20.0674969999616,9.9920033099353,9.33418127254992,11.9916927978467,11.5945492665978,11.8135196544152,10.1945949956432,8.13553936476643,7.90004175912699,12.4811799407968,7.90032536050218,13.0189678145204,11.795070039263,9.25815818612519,10.3670593961086,7.52330312309168,13.6317233426601,11.2588462554307,9.23939456095321,12.1388535517288,10.9548803476566,8.128843046…
ENSG00000026508,9.39319095129918,10.8458795796137,7.35366535731193,10.4557301851431,21.1719360880642,18.801971783672,8.75075529956679,6.51321346943873,10.5158063404841,10.6774001900701,9.36088495559758,11.66590099962,9.76422586089031,7.65308032780091,8.3666318422761,9.31389780666264,9.12663001817679,6.05854370784894,4.95246718197741,6.90388093582337,8.40562779790889,6.56813395023613,9.89746161740…
ENSG00000026559,10.3530790777093,11.5794173289596,5.1644062051351,5.93335553758987,7.91795983781264,7.83415490986335,4.15660876729423,4.38933951201306,5.71974601627683,6.17190762431796,7.98795516210993,5.98062013271661,8.2790523480688,9.7652207766922,7.9894476198784,7.50377632480241,4.76886973922751,4.50784502072094,2.92159934476365,4.18339253732048,4.71936085860248,4.74631577425822,5.10178433886…
ENSG00000026652,40.3153013092257,41.1829050704173,37.6103495373969,36.685503140952,45.384827766013,49.30294823274,34.8936367570226,36.7430194634641,39.3632210312716,40.8888880111065,34.3232448371911,36.1790600621128,28.4078933622666,30.8043340792847,36.003948501598,38.9998901091704,52.7042328076696,38.4789650968739,36.4487332889417,52.1769142844941,38.6471043445755,37.6349281090172,51.52802182257…
ENSG00000026751,0,0,0,0,0,0,0,0,0,0,0,0,0,0,0,0,0,0,0,0,0,0,0,0,0,0,0,0,0,0,0,0,0,0,0,0,0,0,0.294118321800856,0,0,0,0,0.0955444562622321,0,0
ENSG00000026950,6.03358250886371,5.92069754829154,4.37851830435367,3.90733169548601,4.76225120680036,6.68514552308339,1.31261329493502,1.06193697871284,5.57764052518921,5.61643593812934,3.99397758105497,5.38994160109027,0.979582529733332,1.39895016744748,6.61786862934134,5.13416274854902,2.71332243783634,1.73101248795684,1.6389459738918,3.61876286970667,2.58273479824016,2.54095692965339,2.1087375…
ENSG00000027001,19.7462700290085,20.9582214098816,19.5068603943962,18.3065725732956,16.5244379223916,15.250488224534,17.392126157889,20.7431689841907,20.2855588527582,19.7192448596959,19.345828908235,22.2242797524407,17.1584939885548,17.3634403136128,20.8137111814,23.2024662674811,17.0199316555189,15.1102965094566,12.9334214896245,14.013081750779,13.9937267250103,17.3552152553684,14.8631983739049…
ENSG00000027075,9.59888126410136,13.3084705952748,7.18526080714448,9.08092829228693,8.5491015640151,8.87870889784513,4.59414653227257,5.52207228930675,4.2631647326287,4.90666656133278,9.48569675500555,10.0415350376476,8.91104107692902,7.26905479163885,9.15528976183491,8.35947011622724,6.4955294723961,9.73694524475723,8.12347134885503,9.41904945519397,8.66390127773291,9.15703346346788,5.6119627727…
ENSG00000027644,0.068563437600724,0.0523955535247039,0.112269700111633,0,0,0,0,0.0707957985808557,0,0,0,0,0,0,0,0.065822599340372,0,0,0.142517041207983,0,0.0469588145134575,0,0.0340118955924597,0,0,0,0,0.0292239014340928,0,0.0306607812275074,0,0,0.041781044015536,0,0,0.0343258480672745,0.0719169957049013,0,54.647184190599,76.0225215890267,95.0416107378468,0.755098560318298,0.714886729772101,0.621…
ENSG00000027697,28.6595169171026,27.0361056187472,49.7635445744811,48.8416461935751,30.5816854605372,27.6806806815172,31.1745657547067,30.1590101954445,30.6237333293828,29.5942970586046,29.2059610614644,32.4134844229949,40.1944831555096,41.4198971146214,40.907343392768,40.2176081969673,34.1631961491212,43.5277515200814,39.9760300588392,31.5166014468071,43.1551505378674,41.0388515430812,31.8351342…
ENSG00000027847,7.33628782327747,8.85484854567496,8.75703660870734,7.59758940788947,9.63925545472843,10.6544506774142,9.29767750578972,10.1945949956432,8.24211848308215,10.0293498895167,9.11126135678164,7.45731646178243,7.9630579836387,8.5308529818856,9.08671081230806,8.72149441259929,8.05774542145338,9.01569004144188,8.15910060915703,6.80122099625722,8.82825712853001,8.94129183736524,7.856747881…
ENSG00000027869,2.53684719122679,3.03894210443283,1.85245005184194,2.46017180826897,2.18030778142667,2.40247417235809,1.75015105991336,3.32740253330022,2.59342521234912,2.25274628287605,1.62255339230358,1.99354004423887,1.92756562302365,1.92012768081026,3.70326327445008,4.01517855976269,1.47999405700164,2.9932090937587,2.28027265932773,2.3098486402383,2.93492590709109,1.98961721850218,1.972689944…
ENSG00000028116,25.4370353498686,21.1678036239804,31.7161902815362,28.7984817556191,31.3849567484313,25.9049389019481,23.2988859850966,24.4245505103952,33.3947904055915,31.9396219558454,34.3232448371911,33.8163459356075,22.4040004380946,25.812002109178,29.5232377713103,27.8758708206475,23.1043516676367,18.2477566438784,16.0687963962001,21.5329223239993,19.2296345432608,19.8242583096543,21.3934823…
ENSG00000028137,3.77098906803982,3.45810653263046,1.76824777675821,1.01301192105193,2.52456690480983,1.67128638077085,1.4219977361796,1.84069076310225,1.38552853810433,1.85157228729539,1.49774159289561,1.18135706325266,1.42197463993548,1.5909629355285,2.67457903154728,3.81771076174158,2.4666567616694,2.7768325327641,2.13775561811975,1.97620383664833,2.25402309664596,1.67799042524281,1.80263046640…
ENSG00000028203,54.5079328925756,55.9060556108591,56.3313220310116,58.935586406914,81.3025296389892,85.3400608181114,52.8326851211345,55.1499270944866,75.7777531224751,71.5324093658451,73.1397144530691,76.27136539625,41.490060049673,46.9334065980909,67.4473968596602,67.6985434215726,70.1352739234667,49.1896048661069,48.7051988328282,66.6006357935377,56.7732067467701,53.1443538966186,65.7449941802…
ENSG00000028277,6.92490719767312,7.33537749345855,6.28710320625142,5.9695345347703,8.31959548175966,8.77425349904695,3.93783988480506,5.94684708079188,6.99869543606544,7.62230591603268,5.86615457217448,5.31610678463698,6.76227939880429,5.26663592450815,7.92086867035155,9.14934130831171,7.48219217706386,8.69112519994997,7.73154948553308,9.11106963649553,8.40562779790889,7.19138753675488,7.17650997…
ENSG00000028310,46.0060666300858,47.1559981722335,51.7843991764905,51.5550709821071,40.1061878741379,41.8866149180694,50.5356118549982,46.3712480704605,41.1750660426388,43.1107747558609,39.4405286129178,40.6829838657636,40.9844690665849,41.2004539511002,37.5126853911887,36.5644539335766,34.2043070951491,37.9380236943874,38.6933766879674,38.0611725941489,40.4784981106004,39.960143412568,33.0595625…
ENSG00000028528,60.8157691518422,65.2324641382564,73.9857323735659,67.256755758412,62.2535248117878,69.3583848019902,59.6145204782988,58.0525548363017,70.9816927982678,72.7050718144655,54.293132742466,61.7259065549516,60.6709179705805,61.0874906452065,58.7378702697498,63.4529857641186,68.203059460159,50.415738711743,48.7408280931302,67.2935903856092,51.1616284124119,51.9937318907378,64.9627205815…
ENSG00000028839,37.7784541179989,37.4628207701633,42.2414746670018,37.3005460930192,43.2045199845864,41.9910703168675,40.1440899367627,41.8403169612857,45.7579681302147,45.0240661193995,48.4269781702915,44.4485595048814,41.1424662487999,45.3698740580025,43.3761855757347,42.1264635778381,49.0864695572211,32.0958565475331,32.7789194778361,46.9925873364037,34.0451405222567,36.1007654345095,44.555583…
ENSG00000029153,29.8936587939157,28.8699499921118,37.7226192375085,40.8099088195206,34.770171461699,39.1707745493167,41.5660876729423,34.5483497074576,37.5513760199044,39.2533324906622,48.3021663708835,42.6026890935492,43.3544267998107,39.5271998292513,39.2271591293601,39.8555839005952,34.1631961491212,24.1620493110642,24.762335909887,31.4909364619155,27.095235974265,30.131913779003,34.1819550704…
ENSG00000029363,440.520086584652,383.221078479684,666.57327698779,694.238776895195,416.438786252494,380.11319622657,570.986783296733,591.215713948726,538.579811222092,511.033951293527,500.744939224766,482.658195155166,657.205079141737,651.444461308042,415.17696043557,419.553248195531,433.021594511064,538.741574116401,519.474615203098,464.741546415946,501.144468487618,542.686074815313,438.54938176…
ENSG00000029364,60.1301347758349,60.516864321033,78.4484529530033,71.5258774257023,70.0567316084727,71.9697697719446,48.3479230301065,55.7870892817143,70.2001125972859,70.2363087647384,78.6314336270197,74.7946690671842,62.8512790851483,63.5836566302599,64.8071073028763,61.2808399858863,53.5264517282261,63.5065206519166,63.1706785154385,53.845138302444,65.5075462462732,63.4040667823889,52.75245006…
ENSG00000029534,11.5186575169216,12.6797239529783,6.73618200669795,6.18660851785285,22.2620899787776,21.4133567536265,14.3293618030406,12.6016521473923,12.5052832157108,13.6090563116211,16.7247811206677,16.6128337019906,17.790482717415,14.592970374158,17.6590795031647,17.7391905222303,13.8132778653487,11.0712673708906,11.7220266393566,17.4008597564619,12.0684153299586,12.0335884781698,12.75446084…
ENSG00000029559,0,0,0,0.0723579943608521,0.229506082255439,0,0,0,0,0.0308595381215898,0,0,0,0,0,0.032911299670186,0,0,0,0.0256649848915367,0.0234794072567287,0,0.0340118955924597,0,0.0933877285723024,0,0,0,0,0.0306607812275074,0,0.0390307067450096,0,0,0,0,0.143833991409803,0.0312234951555498,0,0,0,0,0,0,0,0
ENSG00000029639,29.2765878555091,32.0660787571188,22.9591536728289,23.4439901729161,17.3277092102856,16.3994976113139,11.594750771926,14.6547303062371,21.6355610180906,21.663395761356,18.3473345129713,20.8952530562815,14.662138509557,15.1690086784011,22.9396586167324,25.835370241096,17.5954848999084,15.0381709891251,15.1068063680462,17.2981998168957,15.0033412370497,15.3176554532879,17.6521738124…
ENSG00000029725,104.833496091507,105.891413673427,87.991377462492,86.0336552950531,120.777575786925,113.020741499629,84.0072508758412,78.6541322233307,111.552810503784,106.804861438822,120.068951030465,114.886974401321,79.0617899804128,73.705472547674,106.880292837601,107.685772520849,112.109549817874,97.0809503662462,92.386671963075,114.979132314084,104.436403477929,96.700191077564,118.735527513…
ENSG00000029993,379.841444308011,351.626559704288,388.340892686137,380.385976354999,532.798369956001,500.550271040869,774.004306246683,768.276006199447,348.442664146852,333.468168941899,379.55268199963,378.108095057305,923.209135119001,965.41276751596,366.554485221031,352.15090647099,830.11222219381,727.56618634436,708.167177762468,776.032148165395,674.422494042277,660.69674429346,831.82893050478…
ENSG00000030066,247.856826926617,233.841355380754,262.17781718569,260.524958696248,234.153580421112,237.844943063451,242.614690680489,227.254513444547,258.809625643334,248.326703264433,272.838593505817,267.946548908995,256.555824480804,265.827962210461,223.464507033251,219.617102699151,266.193375530156,223.589113027759,207.861104601843,227.80240589728,204.857828314958,216.388850980954,274.5440212…
ENSG00000030110,23.4486956594476,25.831007887679,32.2494713570665,29.4135247076864,29.2620254875685,34.6791924009951,31.0651813134621,32.5660673471936,31.3342607848209,31.7544647271159,26.0856660762653,29.9769354800363,33.1794082651612,32.4227274102533,29.6261061956006,26.7568866318612,30.8332095208675,35.7381953242756,32.9214365190441,26.4092694533913,28.9031503330331,29.6045453596409,28.5019685…
ENSG00000030304,0.068563437600724,0.104791107049408,0.0280674250279081,0.108536991541278,0,0,0,0,0,0.123438152486359,0,0.147669632906583,0.0947983093290321,0.0274303954401466,0,0,0,0.072125520331535,0.106887780905987,0.0256649848915367,0.093917629026915,0.0239712917891829,0.136047582369839,0.235666426239779,0,0.0258032267089819,0.0664716764352888,0,0.199570557422187,0.0306607812275074,0.072435497…
ENSG00000030419,7.40485126087819,8.38328856395263,7.40980020736775,7.99555837687415,15.549037072806,13.5792018437631,5.03168429725091,5.5928680878876,11.688176641957,12.5289724773655,15.476663126588,14.1024499425787,14.756936818886,12.1242347845448,12.5156582886507,12.9670520700533,9.29107380228809,6.49129682983815,5.98571573073529,13.2174672191414,7.184698620559,7.69478466432772,9.69339024385101…
ENSG00000030582,51.6282685133452,50.9808735795369,48.1356339228625,43.2339016306091,54.3355649739752,58.9128449221724,44.6288520277906,38.8668934208898,39.1500627946402,41.752955078511,40.5638348075895,46.9589432642933,40.2892814648386,37.6619329393213,52.1885805899353,51.1770709871392,46.784256579663,49.6944835084276,45.3916776247426,37.8045227452335,44.8691472676086,43.7955500988372,44.75965459…
ENSG00000031003,25.9855428506744,28.5031811174389,42.8308905925878,42.2208897095572,26.4505759799393,25.9049389019481,39.7065521717843,41.698725364124,33.18163216896,30.9521167359546,28.5819020644246,28.7217436003304,41.395261740344,42.6816953048681,25.6485271230431,27.4809352246053,41.1109460278234,62.7852654486013,60.6053717736948,51.6379496017718,54.8244159444616,54.8942581972289,43.3991787759…
ENSG00000031081,10.0102618897057,10.3743195978914,5.19247363016301,4.92034361653794,8.31959548175966,8.56534270145059,4.81291541476174,5.30968489356418,6.67895808111829,5.98675039558842,11.9819327431649,12.1089098983398,5.75109743262795,5.54093987890962,6.65215810410477,6.48352603502664,8.79774244995421,7.35680307381658,7.09022280009715,7.1348657998472,7.20817802781573,8.12626791653302,9.14919991…
ENSG00000031691,17.6893669009868,16.0330393785594,17.7947474676938,18.8854365281824,21.286689129192,18.3841501884793,17.5015105991336,15.8582588821117,20.2145061072144,19.1946327116288,20.8435705011306,24.586993878946,25.9747367561548,27.6498386036678,28.7688693265149,28.0733386186687,15.0054953001555,14.7136061476332,17.13767420526,16.6822401794989,18.266978845735,18.5058372612492,16.12163851082…
ENSG00000031698,112.169783914784,105.419853691704,98.4043921478459,91.0625359031323,118.539891484934,114.692027880399,84.0072508758412,90.1938473920102,99.6159492524239,107.946664349321,106.339653095588,110.678389863484,102.255776329583,106.265351935128,113.841056214576,113.971830757854,112.931768738431,126.61635094201,109.168053565315,93.2152251260613,120.519797448789,111.993875239063,106.423221…
ENSG00000031823,47.6515891325032,43.4883094255042,51.8124666015184,46.453832379667,52.7290223981871,58.8083895233742,47.5822319413944,48.1411430349819,56.0961426068393,57.1518646011843,60.0344755152325,59.7323665107128,51.1910870376773,52.2549033134793,52.2914490142256,48.478344414184,49.6620228016107,48.4683496627916,43.2182927463208,46.3766276990068,44.3760797152173,47.0556457821661,51.11987907…
ENSG00000032219,24.8199644114621,26.0929856553025,24.5870643244475,26.1212359642676,26.9095881444502,20.1598919680483,17.5015105991336,21.8759017614844,27.2842542888237,26.5083432464456,29.7052082590963,28.0572302522507,18.7068663742623,20.1339102530676,23.3168428391301,26.6252414331805,27.5032228926138,31.6991661857097,32.0663342717962,29.4120726857011,29.7249295870186,29.0052630649114,29.148194…
ENSG00000032389,12.409982205731,12.0509773106819,16.4475110663542,12.481754027247,18.0736039776158,19.6376149740575,12.1416729781489,8.07072103821755,17.1237116760586,17.4973581149414,16.9744047194836,14.693128474205,12.3237802127742,10.6429934307769,14.0243951782415,13.4936328647763,12.2510619162914,12.6219660580186,10.8312951318067,11.5235782163,12.2327711807557,12.2013875206941,11.734103979398…
ENSG00000032444,79.2593338664369,68.5857795638374,51.026578700737,43.7042285939546,63.8600673875759,70.1940279923756,55.7860650347383,47.1500018548499,51.7619251286668,56.0409212288071,41.3127056040373,45.1130728529611,63.2620717589074,58.7833374282342,57.8806334006641,55.554273843274,67.2575077015191,73.6401562584973,62.8143859124185,52.3052392089518,63.3943995931676,60.0001433483249,57.48010355…
ENSG00000032742,9.18750063849701,10.4791107049408,9.14998055909805,10.0577612161584,9.1228667696537,6.58069012428521,7.00060423965343,7.22117145524729,8.81054044743264,8.42465390719401,8.73682595855774,6.12828976562319,3.66553462738924,3.89511615250082,8.22947394322239,7.83288932150427,6.74219514856304,6.02248094768318,5.8431986895273,8.93141474225477,6.24552233028985,6.30444974055511,7.414593239…
ENSG00000033011,16.7294787745766,13.5704483628983,20.2085460200939,17.6553506240479,15.147401428859,13.9970234389558,14.3293618030406,17.9113370409565,18.9355566874258,19.5032280928447,19.7202643064589,16.3174944361774,17.1268945521118,17.8023266406552,17.3504742302939,15.2050204476259,17.7599286840197,14.3890413061412,13.2540848323424,14.5777114183928,15.2146559023602,14.8861722010826,17.1079834…
ENSG00000033030,30.30503941952,30.5466077049024,30.0040773548338,28.5814077725366,34.5406653794436,30.2920656514716,38.7220922005831,40.2120135939261,39.2921682857278,36.5376931359623,44.8074359874604,48.6571440427191,31.7258341887827,32.7244617600949,41.1816591908754,42.6859556722312,38.397623589987,34.439935958308,36.5556210698476,33.8521150719369,38.6001455300621,38.2821529873252,36.7328472398…
ENSG00000033050,50.1198728861292,43.5931005325536,47.8268922475555,45.1513884811717,50.8355972195797,51.6009670062999,65.630664746751,64.4241767085787,59.8619381206613,60.330397027708,56.4149333324014,52.93956339701,52.9606554784859,52.3097641043596,48.1081330930876,45.647972642548,58.9119856578709,42.3016176744453,39.8691422779332,45.5553481824776,44.7047914168115,39.9361721207788,53.84083072286…
ENSG00000033100,15.6324637729651,15.7186660574112,15.5212860404332,17.1488446635219,18.5899926626906,20.4732581644429,21.6581193664278,18.6900908253459,20.3921379710739,21.3856599182617,14.1037333331004,17.8680255816965,17.6324855352,16.2387941005668,14.0586846530049,13.8227458614781,18.4999257125205,18.1035056032153,19.4892053851917,17.169874892438,19.2296345432608,16.0847367905418,19.0126496361…
ENSG00000033122,0.274253750402896,0.576351088771743,0.252606825251173,0.325610974623834,0.459012164510878,0.731187791587246,0.109384441244585,0.353978992904279,0.532895591578587,0.586331224310206,0.249623598815935,0.147669632906583,0.252795491544086,0.16458237264088,0.30860527287084,0.427846895712418,0.287776622194764,0.072125520331535,0.213775561811974,0.282314833806904,0.493067552391304,0.67119…
ENSG00000033170,37.2985100547938,35.0002297545022,42.7186208924762,39.7245389041078,28.0571185557274,29.1430562646917,28.986876929815,27.3979740507912,29.7000476373133,28.1747583050115,41.8119528016692,38.8371134544313,33.3374054473763,32.6421705737745,36.2096853501785,36.3669861355555,25.6532303213618,27.5880115268122,24.904852951095,26.1782845893674,26.4143331638198,28.16626785229,26.9374213092…
ENSG00000033178,133.013068945405,137.381141341774,112.185497836549,114.868316047853,127.146369569513,125.868755551804,102.383837004931,110.01667099465,135.177848397102,124.456517244372,136.294484953501,120.498420451772,109.99763825812,108.5695051521,122.619161754014,123.81230935924,133.898351212621,100.831477423486,96.3058905962945,125.322121225374,110.001022997774,107.535214966275,136.5577608037…
ENSG00000033327,24.2714569106563,21.5345724986533,13.6688359885913,13.4947659482989,26.7374585827586,27.2628590863244,8.64137085832221,6.7256008651813,19.8947687522673,20.5215928508572,27.3337840703449,22.9626279169736,5.87749517839999,6.08954778771255,24.6541323549037,23.2024662674811,20.2265854456891,13.1629074605051,11.6151388584506,21.2506074901924,14.0876443540372,13.2800956512073,18.9106139…
ENSG00000033627,45.2518688164778,40.2397851069726,43.4483739432018,46.2729373937649,46.1307225333432,45.9603754711983,44.8476209102798,43.5394161272263,43.8040176277599,44.5920325856972,43.0600707957489,46.5897691820269,42.5328414522924,40.4598332742163,49.8911857807857,48.478344414184,38.2331798058758,38.1183374952163,40.0472885794432,42.1675701767948,39.1636513042235,38.4259807380603,38.1613468…
ENSG00000033800,69.6604526023356,75.0828282009007,67.2776177918958,70.2596125243874,77.0566671172636,77.6103613070462,63.0054381568809,67.256008651813,70.1290598517421,68.90934862551,75.1367032435966,76.27136539625,65.4424328734752,63.4739350484993,70.7391864369491,69.7390440011241,70.9574928440232,55.9694037772712,56.8999287022872,76.943624704827,59.121147472443,62.9486122383944,75.5404201108529…
ENSG00000033867,143.708965211117,154.095322916154,121.644220070954,133.247246615509,125.769333075981,110.09599033328,107.306136860938,108.883938217356,97.5909460044252,98.7196624509657,103.843417107429,95.4684176741058,138.057937819514,136.49364771017,99.6795031372812,101.432625583513,138.25611149157,92.1042894633703,97.3391391450524,112.078989021341,103.544186002174,100.176028386996,133.42866640…
ENSG00000034053,13.918377832947,11.0554617937125,13.6969034136192,12.9159019934121,11.2457980305165,12.5346478557814,11.9229040956598,11.5397151686795,13.6066007716399,12.3129557105143,15.1022277283641,15.9483203539109,9.95382247954837,9.07946089068853,14.5387372996929,14.3164153565309,16.2799346270181,14.7496689077989,13.1471970514364,15.5786458291628,12.725838733147,13.6396650280451,14.79517458…
ENSG00000034152,28.316699729099,26.1453812088272,19.3103884192008,18.4874675591977,23.6965029928741,22.6668215392046,19.5798149827807,16.4954210693394,18.7223984507944,20.2747165458845,22.0916884952103,21.1167575056413,23.3203840949419,22.1911899110786,21.8081059495393,21.4252560852911,21.5010247725516,24.8833045143796,19.3823176042857,17.9654894240757,19.6757432811387,19.8482296014435,22.0397083…
ENSG00000034239,0.068563437600724,0.0523955535247039,0,0.108536991541278,0,0,0,0.0707957985808557,0,0.0308595381215898,0,0,0.252795491544086,0.109721581760586,0.0685789495268533,0,0,0,0.178146301509979,0.0256649848915367,0.0234794072567287,0.0479425835783659,0.0680237911849193,0.0471332852479557,0.0622584857148683,0.0258032267089819,0,0.0584478028681856,0.0332617595703645,0,0,0,0.0835620880310721…
ENSG00000034510,379.018683056802,388.775007153303,391.708983689486,327.130492505412,449.602415138405,466.288900235066,318.855646227965,312.280267540155,360.805841871475,369.882423925375,338.614411793816,352.708918197373,387.977880647285,356.211115185744,355.478984872444,337.99904761281,412.87723095743,432.680996468879,373.180872403103,384.692458539243,403.352737263343,387.376075313196,419.3326607…
ENSG00000034533,7.13059751047529,6.60183974411269,12.0128579119447,8.9000333063848,4.87700424792808,5.01385914231254,12.5792107431273,9.9114118013198,9.09475142960789,8.94926605526104,9.48569675500555,8.34333425922193,11.849788666129,11.9047916210236,8.64094764038351,7.53668762447259,0.24666567616694,0.28850208132614,0.0356292603019958,0.513299697830734,1.19744977009317,2.01358851029137,0.2720951…
ENSG00000034677,17.7579303385875,16.9237637884794,48.9776566736997,46.3814743853062,24.4423977602042,23.1890985331955,19.9079683065145,19.1148656168311,18.7223984507944,17.8059534961573,26.3352896750812,20.5999137904683,25.7219412646107,24.1661783827692,19.0649479684652,19.286021606729,21.5421357185795,26.9028190836626,30.8549394215283,22.1232169765046,28.4100827806418,29.9880860282679,24.2504815…
ENSG00000034693,18.1007475265911,17.7620926448746,14.7915329897076,14.2907038862683,20.9424300058088,20.4732581644429,20.4548905127374,21.8051059629036,24.3710917215274,25.6442761790411,13.8541097342844,17.2773470500702,17.2216928614408,15.4158822373624,14.7787636230369,12.8354068713725,16.7321550333241,12.9104681393448,11.6863973790546,15.6299757989458,14.6746295354555,14.8142583257151,16.733852…
ENSG00000034713,33.6646478619555,36.5197008067186,33.2037638080153,36.938756121215,40.3930704769572,39.7975069421058,38.3939388768493,35.1855118946853,40.6066440782883,37.4943388177316,36.8194808253505,42.824193542909,36.7185451467784,37.9088064982826,40.7701854937143,39.7897613012549,36.3420762885959,28.2732039699617,32.2088513130042,37.8815176999082,33.2468406755279,35.2857415136773,39.89595352…
ENSG00000034971,0.068563437600724,0,0,0,0,0,0,0,0,0,0,0,0,0,0,0.032911299670186,0,0,0,0,0,0.0239712917891829,0,0,0.0933877285723024,0.0516064534179638,0,0.0292239014340928,0,0,0,0,0,0,0,0,0,0.0312234951555498,0,0,0,0,0.102126675681729,0,0,0
ENSG00000035115,16.5923518993752,16.5569949138064,14.370521614289,16.0996537452896,21.8604543348306,20.6821689620392,14.766899568019,17.2033790551479,19.3263467879168,16.6024315094153,25.3367952798174,27.6880561699843,17.600886098757,16.4856676595281,28.7345798517515,28.7315646120724,14.2654982716547,11.5761460132114,15.5699867519721,17.0928799377634,15.0972588660766,18.0983253008331,12.992544116…
ENSG00000035141,85.5671701257035,77.7550014306606,103.147786977562,104.810554831694,100.122028383935,96.0989668943237,133.886556083372,135.219975289434,125.230464020968,125.536601078627,108.0870182873,101.449037806822,118.845480462163,121.736094963371,84.0435026451587,84.3516610546867,100.187375469806,83.304975982923,86.3296977117357,92.9072453073628,87.249477366004,89.2211480393389,103.056043645…
ENSG00000035403,451.76449035117,466.582404137488,1078.68727867257,992.281355667545,477.143145009057,486.657703000711,966.958460602131,946.256643831718,523.552155539576,512.237473280269,362.578277280146,355.440806406145,910.063769558708,797.813051376664,619.336493177012,609.122334295802,661.105123073428,870.915658003286,789.401891251018,561.395879517474,729.8104157609,710.988514467166,630.41048480…
ENSG00000035499,75.2826544855949,71.310348347122,82.3778924569104,81.0409536841543,73.212440239485,71.029671182761,65.8494336292401,63.787014521351,74.9606465487212,71.841004747061,72.0164082583974,77.009713560783,80.5153640567913,85.8022769367786,81.1631867650308,79.1845870064675,72.8485963613031,59.106863911693,63.1706785154385,72.0929425603266,64.6388081777742,66.3525356724584,73.0915636281958…
ENSG00000035664,2.33115687842462,2.93415099738342,1.7401803517303,1.73659186466045,2.52456690480983,3.34257276154169,0.875075529956679,0.566366388646846,2.38026697571769,3.30197057901011,2.49623598815935,2.43654894295862,1.64317069503656,1.1795070039263,2.09165796056902,3.25821866734841,2.42554581564158,2.09164008961452,1.88835079600577,3.13112815676748,1.80791435876811,1.46224879914016,2.0067018…
ENSG00000035681,28.8652072299048,25.6738212271049,29.7514705295826,29.3411667133255,31.7865923923783,31.6499858358479,31.9402568434188,29.0262774181509,25.9697784962631,25.0888044928525,45.9307421821321,38.763278637978,37.3189344391956,35.7143748630709,30.140448317052,28.2708064166898,28.0376651909756,26.0733755998499,25.7243259380409,23.6887810548884,27.1421947887784,28.5498085209169,28.02580196…
ENSG00000035687,143.640401773517,142.987465568917,131.074874880331,124.600466289387,133.457786831538,125.973210950603,154.450831037354,152.281762747421,131.483105628823,138.497607089695,138.416285543436,144.642405431998,116.254326673836,123.244766712579,136.197793760331,129.769254599543,149.726065433333,112.768251038355,106.495859042665,134.150876028062,116.763092287712,122.469329750936,146.38719…
ENSG00000035720,0,0,0,0.036178997180426,0.229506082255439,0.104455398798178,0,0,0.0355263727719058,0.0617190762431796,0,0.147669632906583,0,0.0274303954401466,0,0.032911299670186,0.12333283808347,0.072125520331535,0.0356292603019958,0,0.117397036283644,0,0.136047582369839,0.0471332852479557,0.0311292428574341,0.0258032267089819,0.132943352870578,0.0292239014340928,0.266094076562916,0.306607812275…
ENSG00000035862,67.2607322863102,60.9360287492306,75.8662498504357,74.4201972001363,57.8929092489345,59.2262111185669,64.5368203343051,58.8313086206911,53.9645602405249,53.2944223359856,49.3006607661472,54.6377641754357,56.088999686344,58.4541726829524,66.4872915662842,65.296018545649,58.5419871436205,61.9918847249544,58.895167279199,54.8460727132139,56.8906037830538,59.1371768439143,58.092317671…
ENSG00000035928,177.716430261077,179.611957482685,166.299493290356,166.785177001764,174.08036339075,164.308342309534,138.3713181744,147.184465249599,189.39109324703,177.689220504114,180.852297342145,168.638720779318,162.57910049929,172.537187318522,155.057004880215,154.288172853832,157.989365584925,130.87175664157,126.376986291179,156.761727717506,144.257478185341,146.560477999064,159.95794497133…
ENSG00000036054,128.693572376559,126.430470655111,66.2671904908911,66.7140708007056,54.392941494539,57.7638355353924,48.1291541476174,54.7251523030015,41.104013297095,43.0181961414962,89.8644955737368,98.2003058828776,51.8546752029806,52.2549033134793,44.4391592934009,46.9973359290256,70.4230505456615,82.9443483812653,79.2751041719405,68.3201897812707,79.1021230479192,86.4644494835829,73.19359931…
ENSG00000036257,160.09562679769,158.968109393952,169.471112318509,177.023833203825,171.441043444813,175.693980778535,163.310970778165,170.617874579862,180.189762699106,171.609891494161,178.73049675221,175.283854260114,177.715230555492,178.791317478876,167.504084219339,168.440031712012,175.667072376889,164.482249116066,159.084647248411,162.33102943897,165.882012268789,168.446267402589,174.95719092…
ENSG00000036448,0.411380625604344,1.04791107049408,1.40337125139541,0.976832923871503,1.09015389071333,1.14900938677996,0.43753776497834,1.34512017303626,1.45658128364814,1.5121173679579,1.62255339230358,1.10752224679937,0.91638365684731,0.905203049524838,0.960105293375946,1.11898418878632,0,0.14425104066307,0.24940482211397,0.102659939566147,0.258273479824016,0.287655501470195,0.204071373554758,…
ENSG00000036473,0,0,0,0,0,0,0,0,0.0355263727719058,0,0,0,0,0,0,0,0,0,0,0,0,0,0,0,0,0,0,0,0,0,0,0.0390307067450096,0,0,0,0,0,0,0.352941986161027,0,0,0,0,0,0,0.109250890135284
ENSG00000036530,1.09701500161158,1.3622843916423,0.673618200669795,1.12154891259321,0.631141726202457,0.835643190385424,0.765691088712094,2.12387395742567,1.03026481038527,0.864067067404514,0.748870796447806,1.6982007784257,2.11716224168172,2.08471005345114,1.30300004101021,1.05316158944595,1.47999405700164,1.29825936596763,1.14013632966386,2.0275338064314,0.915696883012421,1.22253588124833,1.666…
ENSG00000036549,81.4533638696601,77.6502103236112,100.397179324827,100.613791158765,102.474465727053,99.3370842570672,108.181212390894,109.662692001746,113.755445615642,110.785741856507,106.83890029322,102.113551154902,120.457051720757,114.494470567172,90.9699765473708,101.366802984173,90.6085250453228,91.1666576990603,87.1135414383796,88.3388779966693,89.9261297932711,91.7860762607815,91.2879277…
ENSG00000036565,0,0,0,0,0,0,0,0,0,0,0,0,0,0,0,0,0,0,0,0,0,0,0,0,0,0,0,0,0,0,0,0,0,0,0.0665176516062832,0,0,0,0,0,0,0,0.0510633378408644,0.191088912524464,0,0
ENSG00000036672,9.87313501450425,10.0599462767431,8.67283433362362,7.63376840506989,8.37697200232352,6.1628685290925,7.10998868089802,7.07957985808557,5.68421964350493,6.75823884862816,7.36389616507009,4.57775862010407,9.25863487780214,10.286398290055,8.12660551893211,9.47845430501357,7.35885933898039,6.63554787050122,5.38001830560136,6.92954592071491,6.94990454799171,6.52019136665776,7.584652717…
ENSG00000036828,0.34281718800362,0.366768874672927,0.168404550167449,0.253252980262982,0.114753041127719,0,0.21876888248917,0.0707957985808557,0.213158236631435,0.246876304972718,0.374435398223903,0.0738348164532914,0,0.0822911863204399,0.480052646687973,0.394935596042232,0.12333283808347,0,0,0.15398990934922,0.18783525805383,0.0719138753675488,0.136047582369839,0,0,0.103212906835928,0.0664716764…
ENSG00000037042,7.19916094807602,7.33537749345855,4.88373195485602,3.90733169548601,5.56552249469439,6.37177932668886,3.50030211982672,4.3185437134322,4.902639442523,6.38792439116909,5.24209557513464,6.27595939852977,3.00194646208602,3.18192587105701,6.34355283123393,9.18225260798189,7.11219366281345,5.58972782569397,5.91445721013129,7.57117054300332,6.19856351577639,6.06473682266328,6.9724385964…
ENSG00000037241,20.9118484682208,18.233652626597,23.2398279231079,20.5858493956624,22.5489725815969,19.3242487776629,19.4704305415361,19.8228236026396,21.884245627494,21.293081303897,23.4646182886979,19.1232174614025,19.2756562302365,19.5304415533844,22.4938954448079,18.4303278153042,18.2532600363536,19.1493256480226,18.8835079600577,17.4265247413534,17.6330348498033,18.865406638087,18.1963641419…
ENSG00000037280,12.1357284553281,11.5270217754349,12.4058018623354,9.98540322179758,10.0982676192393,9.60989668943237,7.10998868089802,9.48663700983467,6.96316906329354,6.91253653923611,8.1127669615179,9.37702168956801,8.5634472760559,7.81766270044179,14.0929741277683,13.263253767085,8.18107825953686,11.4318949725483,10.6531488302967,9.82968921345855,9.95526867685299,9.51660284030563,7.9587835686…
ENSG00000037474,135.481352699031,127.268799511506,154.258567953383,147.248518524334,129.097171268684,128.689051319355,159.482515334605,158.936567814021,148.500238186566,142.848801964839,137.043355749949,143.977892083918,171.047749466017,171.878857827959,126.013819755593,127.597108821311,144.792751909994,160.94809861982,149.500376227174,127.118670167781,147.732430459337,149.772631098815,146.013067…
ENSG00000037637,32.4990694227432,30.7561899190012,25.372952225229,24.203749113705,39.2455400656801,38.752952954124,31.5027190784405,32.6368631457745,37.4092705288168,38.6361417282304,42.436011798709,40.0923053341372,34.8225789601978,32.1484234558518,32.2663957523845,31.9897832794208,38.1509579138201,34.0432455964845,29.1803641873345,38.1894975186066,30.9223793571118,29.6045453596409,39.4537988872…
ENSG00000037749,51.2854513253415,48.1515136892029,56.1909849058721,56.0774456296604,65.8108690867471,63.2999716716958,59.3957515958096,63.6454229241893,61.4961512681689,57.7690553636161,60.9081581110882,63.4241073333773,64.4628503437418,64.8454548205066,64.9785546766935,62.0048885786304,60.8030891751508,52.904069163181,52.9807100690677,54.9230676678885,53.321733880031,54.4627749450236,62.03769756…
ENSG00000037757,16.4552250241738,15.7186660574112,8.75703660870734,7.66994740225032,13.1965997296877,15.1460328257358,9.84459971201264,8.56629162828355,10.5868590860279,11.7574840243257,6.61502536862229,8.86017797439497,6.98347545390536,8.36627060924472,9.9096582066303,8.95187351029059,11.8399524560131,8.51081139912114,8.97857359610293,12.1138728688053,9.08653060835402,8.05435404116547,12.6524251…
ENSG00000037897,9.87313501450425,9.95515516969374,21.0505687709311,20.549670398482,11.3031745510804,10.7589060762123,22.4238104551399,21.0263521785142,12.3631777246232,14.0719493834449,13.6044861354685,10.2630394870075,18.6120680649333,19.6127327397048,12.0356056419627,13.6581893631272,13.6899450272652,12.5498405376871,12.6483874072085,11.3439233220592,12.5614828823499,12.4890430221643,11.4620088…
ENSG00000037965,0.068563437600724,0,0,0,0,0,0,0,0,0,0,0,0,0,0,0,0,0,0,0,0,0.0239712917891829,0.0340118955924597,0,0,0,0,0,0,0,0,0,0,0.0337019960984547,0,0,0,0,0,0.0414970096009971,0,27.4532262287153,33.8549929884931,7.93018986976526,12.5862046516876,10.9250890135284
ENSG00000038002,3.97667938084199,5.97309310181624,8.05535098300964,7.12726244454393,7.86058331724878,6.89405632067974,4.04722432604964,5.45127649072589,5.08027130638253,5.77073362873729,8.86163775796571,9.08168242375485,9.19543600491611,7.98224507308267,10.6983161261891,9.6430108033645,9.04440812612115,11.2515811717195,10.1187099257668,9.47037942497704,11.1292390396894,12.1534449371158,9.48931887…
ENSG00000038210,41.480879748438,38.7203140547562,47.7707573974997,48.914004187936,43.7209086696611,37.8128543649404,31.2839501959513,34.1235749159725,40.357959468885,38.8830180332031,52.2961439519385,46.8851084478401,51.6018797114365,51.7611561955567,46.2565014558625,49.728973801651,39.9598395390443,37.1807057309063,35.2729676989758,41.7312654336387,38.6471043445755,39.7444017864653,35.5764427897…
ENSG00000038219,136.715494575844,133.241892613322,159.843985533937,168.883558838229,146.310127437842,142.686074758311,135.308553819552,140.175681190094,166.760793791326,159.852407469835,185.844769318464,162.436596197241,203.121177455673,184.496839730426,130.197135676731,147.738824219465,140.804990145295,176.455085491101,173.122575807397,152.013705512572,163.416674506832,173.815836763365,160.26405…
ENSG00000038274,84.2644648112898,85.0903789241191,69.9159557445192,75.0352401522036,64.2617030315229,63.1955162728977,82.8040220221508,80.7072103821755,71.0172191710397,71.4398307514804,69.8946076684619,77.2312180101428,83.0117195357891,86.9817839407049,61.8925019479851,61.2808399858863,67.9975047300199,61.4148805623021,66.76923380594,65.7793562770085,65.7658197260972,69.4927748968413,64.21445887…
ENSG00000038295,1.09701500161158,0.890724409919966,1.20689927620005,0.54268495770639,0.459012164510878,0.208910797596356,1.64076661866877,0.566366388646846,0.746053828210022,0.894926605526104,1.37292979348764,0.812182980986206,0.726787038189246,0.822911863204398,1.92021058675189,1.34936328647763,0.328887568222587,0.396690361823443,0.356292603019958,0.744284561854564,0.56350577416149,0.38354066862…
ENSG00000038358,50.0513094485285,41.8640472662384,52.542219652244,50.6867750497769,43.2045199845864,50.6608684171163,52.6139162386453,49.557059006599,46.6816538222842,50.6096425194073,46.305177580356,48.0664655110927,48.7895298680085,51.4319914502749,45.5364224858306,46.0758195382604,49.4564680714715,44.5014460445571,52.1612370821218,42.7065348595171,48.2032230980641,48.5418658730955,47.548630038…
ENSG00000038382,113.541052666799,105.315062584655,107.975384082363,99.9263902123367,112.630109866857,116.990046653959,120.322885369043,110.724628980458,100.646214062809,103.996643469758,129.055400587839,113.631782521616,120.362253411428,106.484795098649,101.942608471667,109.495894002709,106.107351697812,100.975728464149,87.5054633017016,110.308105063825,93.7297937688612,95.3098561537914,104.45053…
ENSG00000038427,1151.66006137936,1149.82042209963,1163.78771135718,1215.14397829897,1612.62448696784,1597.01859222534,1418.27866517729,1499.10103494962,1489.94054768096,1430.46303008817,1453.43340410578,1162.60301987353,1780.94423792808,1545.23646632978,1085.91337628296,1139.06008158514,1223.54397568008,1121.47971563504,928.783557552425,1128.15574087728,1049.38862793223,1049.00769998643,1333.4023…
ENSG00000038532,23.9286397226527,23.9447679607897,22.6504119975219,22.3586202575033,25.3030455686621,29.4564224610862,31.1745657547067,27.0439950578869,23.5895115205455,24.224737425448,25.3367952798174,27.2450472712645,31.1886437692516,27.7595601854284,25.477079749226,24.3543617559376,29.0654388416711,24.7751162338823,21.1281513590835,26.5632593627405,20.427084313354,22.5809568654103,29.216218313…
ENSG00000038945,0,0,0,0,0,0,0,0,0,0.0925786143647694,0,0,0.0315994364430107,0.0548607908802932,0,0,0,0.072125520331535,0.0356292603019958,0,0.0704382217701862,0.0239712917891829,0,0,0.0933877285723024,0,0,0.0292239014340928,0.0332617595703645,0,0,0,0.041781044015536,0,0,0,0,0.0312234951555498,0.117647328720342,0.165988038403988,0,0,0,0.0955444562622321,0,0
ENSG00000039068,478.847048203456,452.749978006966,582.820080704513,560.774456296603,456.37284456494,453.44088618289,496.058441044193,514.402272488498,356.507150766075,363.679656762936,429.477401762817,393.68724132895,502.020246770111,484.47564426387,483.104409941918,479.320168396589,436.927134383707,582.485702197477,523.750126439338,454.526882429115,517.697450603612,518.211385898557,428.685932047…
ENSG00000039123,209.392738432611,211.154080704557,229.84414355354,227.131744298715,188.309740490588,184.57268967638,182.781401319701,192.77695953567,202.642430290951,196.235802915189,229.154463713029,216.336012208144,179.57959730563,186.965575320039,205.188216984345,211.882947276657,200.662527561806,186.047779695195,175.901658110953,191.306797381515,186.849122949047,189.756745803172,201.146350533…
ENSG00000039139,0.617070938406516,1.10030662401878,0.44907880044653,0.325610974623834,0.860647808457896,0.731187791587246,1.09384441244585,0.566366388646846,1.13684392870099,1.08008383425564,0.249623598815935,0.295339265813166,1.01118196617634,0.603468699683226,0.822947394322239,0.789871192084464,0.616664190417351,0.721255203315351,0.641326685435924,0.692954592071491,0.56350577416149,0.5992822947…
ENSG00000039319,46.5545741308916,45.6365271200171,38.789181388569,42.7273956700831,51.0077267812713,42.7222581084548,31.5027190784405,36.7430194634641,53.929033867753,49.3135419183005,52.0465203531225,47.6972914288263,33.4954026295913,30.5848909157635,46.1536330315722,52.6580794722976,51.0186840205288,35.521818763281,35.8786651241097,57.4895661570422,36.956587022091,38.0664113612225,55.3033422333…
ENSG00000039523,13.3698703321412,14.6707549869171,7.04492368200494,6.62075648401796,13.3113527708155,14.3103896353504,6.67245091591968,7.57515044815156,5.36448228855778,6.29534577680432,5.36690737454261,4.50392380365078,13.2401638696215,11.411044503101,12.5156582886507,14.4151492555415,8.09885636748121,12.8383426190132,13.0759385308324,8.28979011996635,12.8667151766874,11.7459329766996,7.58465271…
ENSG00000039537,0,0,0.0280674250279081,0,0,0.104455398798178,0,0,0,0,0,0.0738348164532914,0.0315994364430107,0,0,0,0,0,0,0,0,0,0,0,0,0,0,0,0,0,0,0,0,0,0,0,0,0,0,0,0,0,0,0,0,0
ENSG00000039560,213.506544688654,201.303716641912,184.739791533691,189.252334250809,189.916283066376,192.302389187446,236.270393088303,223.997906709828,199.445056741479,193.674461251098,206.688339819595,190.936835348212,240.850904568628,241.113175918889,223.121612285617,224.65253154869,168.061547361742,137.651555552735,138.419676273253,154.246559198136,146.558460096501,150.108229183864,166.318169…
ENSG00000039600,1.85121281521955,1.20509773106819,0.645550775641887,0.687400946428095,1.14753041127719,1.04455398798178,0.21876888248917,0.283183194323423,0.746053828210022,0.709769376796565,0.748870796447806,1.03368743034608,0.695187601746235,0.356595140721906,2.02307901104217,1.74429888251986,1.15110648877905,0.973694524475723,0.534438904529936,1.46290413881759,0.845258661242235,0.5513397111512…
ENSG00000039650,25.7798525378722,26.0929856553025,30.8180326806431,31.6204435356924,24.3850212396404,27.8895914791135,22.3144260138953,27.0439950578869,32.5421574590657,32.0013410320886,27.9578430673848,24.6608286953993,20.5712331244,20.764809348191,24.9284481530112,27.5138465242755,24.1321253183323,24.19811207123,27.5057889531407,26.203949574259,24.4655423615114,23.7555501630803,21.8696488659516…
ENSG00000039987,0.205690312802172,0.104791107049408,0.336809100334898,0.325610974623834,1.20490693184105,0.940098589183602,0.65630664746751,1.06193697871284,1.06579118315717,1.14180291049882,1.12330619467171,0.886017797439497,1.10598027550537,0.768051072324105,1.74876321293476,2.33670227658321,0.657775136445174,2.09164008961452,1.21139485026786,0.898274471203784,1.69051732248447,1.19856458945915,…
ENSG00000040199,60.4729519638385,67.4330773862939,53.5807143782766,54.4855697537216,58.065038810626,59.7484881125578,46.379003087704,44.6013531059391,61.6737831320285,57.4604599824002,65.2765710903671,59.8800361436193,48.1891405755913,41.7764922553433,45.4678435363037,46.6353116326536,43.9476013037432,58.169232147383,54.5483975223555,52.8698688765656,55.5053187549068,55.9729663277422,51.800116987…
ENSG00000040275,69.1119451015298,64.0273664071882,65.7339094153609,61.6851901926264,73.1550637189211,77.0880843130553,77.991106607389,72.9196725382814,79.4014431452095,74.1554701061803,68.2720542761583,78.2649054404889,67.2436007507268,67.0947472465986,73.8938181151844,74.9719406486837,77.9463536687531,59.5035542735164,55.7954216329253,71.6566378171704,62.9013320407763,61.054880187049,76.66281266…
ENSG00000040341,90.4351741953549,89.0200454384719,113.392397112749,102.78453098959,93.4089754779636,83.4598636397442,76.5691088712095,75.7515044815157,83.7711869961539,81.0680066454164,105.216346900917,105.731457161113,81.2421510949805,77.9023230500164,98.6851083691418,96.1997289359537,83.0030000301754,84.2426077472329,79.4888797337525,92.1372957606167,85.9346305596272,82.9166982987838,81.4244780…
ENSG00000040487,6.03358250886371,3.9820620678775,5.05213650502347,3.83497370112516,5.79502857694983,7.31187791587246,3.93783988480506,6.30082607369616,6.39474709894304,6.48050300553386,6.11577817099042,6.0544549491699,8.43704953028386,6.55586451019504,5.96636860883623,5.82530004162292,5.01553541539445,7.06830099249043,5.95008647043329,5.1073319934158,7.13773980604554,7.14344495317652,6.2922006846…
ENSG00000040531,9.80457157690353,10.793484026089,10.4130146853539,9.26182327818906,10.3277737014948,10.1321736834233,13.7824395968177,12.4600605502306,10.7644909498875,12.1586580199064,8.4872023597418,10.7798832021805,8.72144445827095,9.18918247244912,8.98384238801778,9.80756730171543,10.483291237095,9.34025488293379,9.76241732274684,11.3439233220592,10.6126920800414,10.5233970954513,10.271592468…
ENSG00000040608,7.88479532408326,6.18267531591506,7.43786763239566,6.33132450657456,5.73765205638597,6.05841313029432,7.65691088712094,5.94684708079188,6.25264160785542,6.97425561547929,5.49171917395058,7.60498609468902,6.7938788352473,5.6506614606702,7.26936864984645,5.62783224360181,5.42664487567269,5.37335126469936,4.45365753774947,5.8772815401619,5.07155196745341,5.46545452793371,6.7683672228…
ENSG00000040633,52.4510297645538,49.0946336526476,60.485300935142,59.44209236744,59.6715813864141,60.8974974993378,70.6623490440019,67.7515792418789,61.7448358775723,65.6999566608647,55.7908743353616,63.1287680675642,49.2319219782107,52.9955239903633,56.8862386325248,54.4682009541578,58.5830980896483,65.1654076195419,63.3488248169484,56.6169566707299,56.3036186016355,62.0616744421946,60.201055198…
ENSG00000040731,0.205690312802172,0.523955535247039,1.57177580156286,1.30244389849534,0.0573765205638597,0,0.43753776497834,0.424774791485134,0.106579118315717,0.0617190762431796,0,0.0738348164532914,1.64317069503656,1.5909629355285,0.137157899053707,0.197467798021116,0,0,0,0,0,0.0239712917891829,0,0.0942665704959114,0,0,0,0,0,0.0613215624550149,0.036217748638104,0,0,0.0337019960984547,0,0,0.0359…
ENSG00000040933,62.1870379038566,63.7653886395646,84.4548819089756,81.7283546305824,58.6961805368285,55.4658167618325,47.9103852651282,55.0083354973249,47.1079702955471,52.3686361923379,61.1577817099042,65.1961429282563,69.4239618652945,66.3541265697147,63.4698177871027,68.1922129166254,62.2008613400968,78.8692564825336,68.9782479446638,65.0094067302624,65.178834544679,65.4655978762586,61.0513525…
ENSG00000041353,0.754197813607964,1.25749328459289,0.673618200669795,0.289431977443408,0.975400849585615,0.52227699399089,0.875075529956679,0.707957985808557,0.817106573753833,0.925786143647694,0.873682595855774,0.590678531626331,0.726787038189246,0.768051072324105,1.50873688959077,2.13923447856209,0.164443784111294,0.28850208132614,0.0356292603019958,0.38497477337305,0.704382217701862,0.26368420…
ENSG00000041357,195.268670286862,187.418894957866,179.968329278947,177.49416016717,182.227829310818,177.574177956903,190.438312206822,183.148730928674,193.085836015308,183.583392285338,190.837241294783,194.997750253143,183.529526861006,195.194693952083,183.860163681494,181.439995081735,198.606980260415,165.708382961702,164.642811855522,203.266680340971,181.37842105823,186.664449162368,195.1602569…
ENSG00000041515,0.068563437600724,0.157186660574112,0.280674250279081,0.0723579943608521,0.0573765205638597,0,0.21876888248917,0.212387395742567,0.213158236631435,0.308595381215898,0.499247197631871,0,0.252795491544086,0.137151977200733,0.617210545741679,0.756959892414278,0.205554730139117,0.360627601657675,0.0356292603019958,0.0769949546746101,0,0.191770334313464,0.306107060332137,0.235666426239…
ENSG00000041802,77.6823748016203,73.2489838275361,78.0274415775846,73.1539322988214,81.4746592006808,81.1618448661843,94.070619470343,91.5389675650465,94.8554153009885,95.541130024442,79.3803044234675,79.4462625037416,90.2163910447955,92.989040542097,76.0540550252803,75.8934570394489,85.675211521984,72.2337086120323,66.2347949014101,75.3780606264433,70.7904128790372,69.3968897296846,83.8393226354…
ENSG00000041880,1.50839562721593,1.62426215926582,0.898157600893061,0.795937937969373,1.26228345240491,1.04455398798178,0.984459971201264,1.06193697871284,1.95395050245482,0.678909838674975,0.499247197631871,0.51684371517304,0.789985911075267,0.932633444964985,0.857236869085666,1.1848067881267,1.52110500302947,0.901569004144188,1.17576558996586,0.898274471203784,0.962655697525879,0.95885167156731…
ENSG00000041982,6.51352657206878,6.6542352976374,2.80674250279081,2.27927682236684,5.10651033018352,7.31187791587246,2.95337991360379,2.97342354039594,4.51184934203204,4.93752609945437,7.11427256625416,5.61144605045015,4.86631321222365,4.0596985251417,4.21760539590147,4.11391245877325,4.89220257731098,2.30801665060912,2.38716044023372,3.05413320209287,3.28711701594202,3.04435405722623,5.237831921…
ENSG00000041988,6.37639969686733,7.02100417231032,3.95750692893505,4.88416461935751,6.08191117976913,5.32722533870708,5.90675982720759,8.21231263537927,5.5065877796454,7.59144637791109,5.24209557513464,5.53761123399686,3.50753744517419,4.77288880658551,7.57797392271728,6.97719553007943,5.22109014553357,3.85871533773713,3.27789194778361,5.36398184233117,5.1419901892236,5.29765548540943,5.611962772…
ENSG00000042062,5.07369438245357,4.66320426369865,1.85245005184194,1.23008590413449,2.75407298706527,2.61138496995445,2.73461103111462,2.4070571517491,1.95395050245482,2.43790351160559,1.99698879052748,4.43008898719749,1.35877576704946,2.08471005345114,3.36036852681581,4.27846895712418,5.38553392964486,3.57021325641098,3.45603824929359,3.31078305100823,3.49843168125258,3.37995214227479,4.96573675…
ENSG00000042088,46.1431935052872,45.5317360129677,45.2727565700158,38.4944529999733,49.4585607260471,51.8098778038963,51.5200718261995,44.4597615087774,53.6448228855778,56.0717807669286,50.423966960819,46.5897691820269,46.7039670627698,48.9906862561019,45.6392909101208,46.9973359290256,40.9465022437121,42.4458687151084,35.8786651241097,39.9603814761226,41.981180175031,40.2957414976165,39.35176320…
ENSG00000042286,4.66231375684923,3.9820620678775,3.92943950390714,3.97968968984686,4.36061556285334,3.86484975553258,7.76629532836553,6.30082607369616,4.58290208757585,4.62893071823847,5.24209557513464,5.83295049981002,6.7938788352473,5.51350948346947,5.00626331546029,5.19998534788939,4.72775879319969,5.12091194353899,4.80995014076943,4.8250171596089,3.89758160461697,4.77028706604741,3.9453798887…
ENSG00000042304,0,0,0,0,0,0,0,0,0,0,0,0,0,0,0,0,0,0,0,0,0,0,0,0.0471332852479557,0,0,0,0,0,0,0,0,0,0,0,0,0,0,0,0,0,0,0,0,0,0
ENSG00000042317,8.63899313769122,7.85933302870559,4.63112512960484,4.84798562217709,8.66385460514282,7.1029671182761,6.56306647467509,5.52207228930675,6.46579984448686,7.40628914918155,7.11427256625416,6.71896829724952,4.26592391980644,4.11455931602199,9.63534240852288,9.8733899010558,7.44108123103603,5.08484918337322,5.30875978499737,8.93141474225477,6.99686336250517,6.71196170097122,6.870402909…
ENSG00000042429,32.4990694227432,28.9223455456366,49.3706006240904,50.1802690892509,33.6800175709857,36.8727557757568,45.9414653227257,53.026053137061,44.8342824381451,41.5369383116599,36.6946690259425,37.0650778595523,50.0219078892859,48.7438126971405,31.0319746609011,30.9037103903046,40.0420614311,42.6261825159372,42.3631904990729,34.1344299057438,36.1348077681055,37.2753587321795,40.9503222933…
ENSG00000042445,12.8899262689361,14.0420083446206,10.8059586357446,9.76832923871503,12.5080814829214,14.6237558317449,10.282137476991,8.99106641976868,13.4644952805523,13.6090563116211,11.607497344941,12.4780839806063,10.0486207888774,8.42113140012501,12.1041845914896,13.9214797604887,8.79774244995421,9.15994108210495,8.26598839006301,9.39338447030243,8.54650424144926,8.65363633589504,10.54368763…
ENSG00000042493,30.30503941952,32.3280565247423,26.9166606017639,23.5887061616378,30.8111915427927,36.0371125853714,29.5337991360379,27.2563824536295,26.040831241807,30.9829762740761,32.3262560466636,32.6349888723548,34.6961812144257,31.8466891060102,39.1585801798332,41.0403906887219,41.3987226500182,60.4051232776606,50.272886286116,40.0630414156888,44.0004091991097,44.3468898099884,45.0317497644…
ENSG00000042753,37.7784541179989,39.9778073393491,44.6833406444298,39.0733169548601,49.2290546437916,59.9573989101541,38.6127077593385,42.19429595419,47.2500757866347,50.9799569768663,38.3172224182461,38.8371134544313,40.3208809012817,39.664351806452,39.4671854527041,38.1771076174158,46.784256579663,45.3308895283698,40.7242445251811,39.7293966120988,42.8264388362732,41.3504783363406,43.3991787759…
ENSG00000042781,2.05690312802172,2.25300880156227,0.30874167530699,0.651221949247669,0.688518246766317,0.731187791587246,1.85953550115794,0.637162187227702,0.852632946525739,0.894926605526104,0.748870796447806,0.959852613892789,0.663588165303225,0.768051072324105,0.445763171924546,0.789871192084464,1.19221743480688,1.08188280497303,1.03324854875788,0.795614531637638,0.892217475755692,1.2225358812…
ENSG00000042813,0,0,0.0280674250279081,0,0,0,0,0,0,0,0,0.0738348164532914,0,0,0,0,0,0,0,0,0,0.0479425835783659,0.0340118955924597,0,0.0622584857148683,0,0,0,0,0,0,0,0,0,0,0.0686516961345491,0,0,0.0588236643601712,0,0,0,0,0,0,0
ENSG00000042832,0,0,0.0280674250279081,0.0723579943608521,0,0,0,0,0,0,0,0,0,0,0,0.065822599340372,0,0,0,0.0256649848915367,0.0234794072567287,0,0.0340118955924597,0,0,0,0.0332358382176444,0.0292239014340928,0,0,0,0,0.041781044015536,0.0337019960984547,0.166294129015708,0,0,0,0.235294657440685,0.248982057605983,0.354822013421295,0.269678057256535,0.255316689204322,0.429950053180044,0.2712544105967…
ENSG00000042980,0.411380625604344,1.3098888381176,0.926225025920969,0.976832923871503,0.573765205638597,0.626732392789068,0.65630664746751,0.424774791485134,1.06579118315717,1.38867921547154,1.12330619467171,0.886017797439497,2.27515942389677,1.81040609904968,1.33728951577364,1.90885538087079,0.698886082472998,0.865506243978421,0.783843726643907,0.923939456095321,0.892217475755692,1.3663636319834…
ENSG00000043039,0,0,0,0,0.0573765205638597,0.104455398798178,0,0,0.0355263727719058,0,0,0,0.0315994364430107,0,0,0,0,0,0,0.0256649848915367,0.0234794072567287,0.0239712917891829,0.0340118955924597,0.0471332852479557,0,0.0774096801269457,0,0,0,0,0.036217748638104,0,0.167124176062144,0.0337019960984547,0,0.171629240336373,0,0,4.11765650521198,3.40275478728176,3.14270926173147,0,0,0.334405596917812,…
ENSG00000043093,125.608217684526,118.047182091158,129.390829378657,140.95337301494,132.59713902308,122.10836119507,127.542258491186,125.096176092372,134.21863633226,132.97374976593,144.157628316203,136.077566723416,138.595128239045,141.184245330435,121.556188036347,117.888275418606,133.692796482482,115.509020810953,121.424519109202,127.375320016697,116.763092287712,124.458946969438,130.9798099265…
ENSG00000043143,68.1520569751196,56.1156378249579,184.992398358943,177.421802172809,78.4337036107962,85.5489716157077,162.873433013187,151.786192157355,71.8343257447935,78.5683840575676,75.0118914441886,72.9487986558519,160.209142766064,167.709437721056,62.9554756656513,63.1567840670869,138.091667707459,300.114290099517,285.390375018986,95.7047286605403,213.756523665258,220.487941876905,133.15657…
ENSG00000043355,75.6254716735985,76.96906812779,219.290791743046,217.616668040263,39.7045522301909,42.5133473108584,45.9414653227257,45.8756774803945,61.6737831320285,63.6015080685966,149.524535690745,147.37429364077,33.2110077016042,35.3029189314687,99.1651610158298,98.7668103102282,7.15330460884127,17.526501440563,19.6317224263997,11.5235782163,22.3523957084058,41.2545931691838,6.76836722289947…
ENSG00000043462,0.068563437600724,0.104791107049408,0.168404550167449,0.0723579943608521,0.516388685074737,0.52227699399089,0.546922206222925,0.353978992904279,0.67500108266621,0.277735843094308,0.249623598815935,0.295339265813166,0.126397745772043,0.137151977200733,0.377184222397693,0.32911299670186,0.739997028500821,0.540941402486513,0.748214466341911,0.641624622288417,0.56350577416149,0.838995…
ENSG00000043514,30.7164200451243,30.7561899190012,28.4323015532709,28.7623027584387,24.3276447190765,24.2336525211773,29.2056458123042,28.8846858209891,26.8934641883327,28.6376513768353,20.9683823005386,17.7203559487899,21.7404122727914,22.3832026791596,21.6023691009588,20.1417153981538,29.4765483019494,29.0665846936086,27.6839352546507,28.4368032598227,28.8327121112629,27.0396171381984,30.746753…
ENSG00000043591,0.205690312802172,0.26197776762352,0.252606825251173,0.18089498590213,0.114753041127719,0.417821595192712,0.21876888248917,0.353978992904279,0.0355263727719058,0.154297690607949,0.124811799407968,0,0.157997182215053,0.493747117922639,0.377184222397693,0.362024296372046,0.534442298361704,0.180313800828838,0.178146301509979,0.590294652505344,0.422629330621117,0.335598085048561,0.170…
ENSG00000044012,0,0,0,0,0,0,0,0,0,0,0,0,0,0,0,0,0,0,0,0,0,0,0,0,0,0,0,0,0,0,0,0,0,0,0,0,0,0,0,0,0,0,0,0,0,0
ENSG00000044090,15.2896465849614,14.6183594333924,15.8019602907123,16.5699807086351,21.1719360880642,20.9955351584338,15.8607439804648,15.5750756877883,17.7631863859529,18.9477564066561,13.3548625366525,15.6529810880978,13.2085644331785,11.0818797578192,18.2077110993795,17.8379244212408,14.9232734080999,21.2049029774713,18.1352934937158,16.9132250435227,16.7877761885611,18.1222965926223,12.822484…
ENSG00000044115,498.319064482062,503.049709390682,549.30757522119,527.127988918807,520.978806719846,528.857684115175,442.897602599324,425.057974679458,457.295470319972,451.876216714439,495.128408251408,469.9586067252,504.263806757565,494.871764135685,489.413673298388,477.904982510771,719.359333594854,749.275967964152,679.129330616341,672.833243916526,661.039231905941,651.108227577787,700.44097783…
ENSG00000044446,33.3903941115526,36.991260788441,36.5157199613085,34.1167943411417,46.7618642595457,49.1984928339418,63.5523603631038,57.7693716419783,36.4855848367473,36.6302717503271,28.8315256632405,34.4808592836871,59.2173438942021,54.0927398079691,33.8437115915021,37.4859703243418,67.8330609459086,65.6702862618627,66.0210193395981,62.5455681806749,59.1681062869564,57.7708132119309,59.2487221…
ENSG00000044459,32.9790134859482,32.2756609712176,41.0907102408575,45.0428514896304,39.8193052713186,33.5301830142151,32.8153323733755,34.9023287003619,40.713223196604,36.1982382166248,54.6675681406899,55.1546078906087,32.579018972744,34.8640326044263,43.8562382224227,44.6277223527722,38.0276250757366,36.4955132877567,37.0188014537736,42.1419051919032,39.3749659695341,40.48751183193,37.9572754811…
ENSG00000044524,2.39972031602534,1.99103103393875,2.89094477787454,3.07521476033621,2.00817821973509,0.940098589183602,1.20322885369043,0.99114118013198,0.42631647326287,0.185157228729539,3.12029498519919,2.28887931005203,0.44239211020215,0.438886327042346,2.26310533438616,2.43543617559376,1.60332689508511,0.57700416265228,0.676955945737919,1.02659939566147,0.610464588674947,1.31842104840506,1.76…
ENSG00000044574,884.262654736537,796.360018021975,727.984802948853,694.781461852902,808.37779822422,809.529340685879,833.946980048715,787.249280219116,884.535629274911,852.031847537094,841.855587006742,810.115606125514,565.029523037474,576.532051361002,701.219758912075,681.625927469222,914.389661550848,605.313429382408,564.688146526331,767.922012939669,598.349214530475,611.867222918895,850.739544…
ENSG00000046604,369.076984604697,367.1356435476,381.576643254411,369.459919206511,427.914090365266,413.016646847996,375.626171233905,361.129368560945,455.270467071973,437.742548254751,468.418683178103,478.080436535062,372.462557353767,377.113076511136,438.459513799936,440.781036482801,356.59634584534,290.233093814097,264.262223659902,339.445090175464,299.174607265238,308.558467910363,351.00276251…
ENSG00000046647,11.1072768913173,9.16922186682318,9.51485708446086,7.19962043890478,23.4669969106186,26.3227604971408,13.0167485081056,15.2918924934648,23.1631950472826,25.3665403359468,16.8495929200756,18.754043379136,14.1249480900258,14.5106791878376,21.945263848593,22.478417674737,19.8565869314387,20.1951456928298,19.2398005630777,21.8409021426977,22.0002045995548,19.0092343888221,22.243779717…
ENSG00000046651,30.0993491067178,29.0795322062107,40.7539011405226,40.339581856175,60.4748526743081,57.5549247377961,70.2248112790235,69.8046574007238,61.4961512681689,60.2995374895864,34.947303834231,35.8837207962996,83.8965037561934,84.8147827009333,34.9409747839317,35.0505341487481,55.7464428137285,69.961754721589,73.5031640030172,61.1339940116404,74.1244887094927,65.8011959613072,57.003937012…
ENSG00000046653,125.539654246926,115.741777736071,126.359547475642,134.911480485809,283.440011585467,265.734534542565,308.354739868485,313.55459191461,293.092575368223,287.271440373879,275.459641293385,277.914249130189,194.241735815187,206.880042409586,250.004560500144,245.551206839258,259.69784605776,229.214903613618,229.238660783041,240.609233358157,238.809051208188,241.318994441705,252.4362890…
ENSG00000046774,0,0,0,0,0,0,0,0,0,0,0,0.0738348164532914,0.0631988728860214,0,0,0,0,0,0.0712585206039915,0.0256649848915367,0.0234794072567287,0.0239712917891829,0,0,0,0,0,0,0,0,0,0,0,0,0,0,0,0,0,0,0,0,0,0,0,0
ENSG00000046889,68.4263107255225,70.6816017048256,36.5999222363922,38.6029899915146,64.0895734698313,64.9712580524667,43.5350076153448,41.9819085584475,74.7474883120898,71.4706902896019,84.6223999986021,74.7208342507309,39.8468893546365,37.2779074031593,70.3620022145514,74.4782711536309,40.0420614311,36.7840153690829,34.3822361914259,50.5856852212188,38.5531867155486,43.4599520137887,42.718940864…
ENSG00000047056,13.164180019339,18.7052126083193,15.3809489152937,13.0967969793142,19.8522761150955,17.4440515992957,9.95398415325723,11.4689193700986,18.5092402141629,17.3122008862119,19.470640707643,16.7605033348972,13.1137661238494,12.6728426933477,15.3273952192517,17.3113436265178,16.0743798968789,11.5761460132114,9.1923491579149,14.8343612673082,10.5892126727847,10.9548803476566,12.720448951…
ENSG00000047188,70.0032697903392,69.895668401955,67.22148294184,69.4274955892376,74.9911123769647,66.8514552308339,57.0986783296733,56.1410682746186,76.6303860690008,75.7601660885029,103.344169909797,89.1186234591228,84.4652936121676,82.1540343432391,89.5983975568338,91.8883486791593,129.910589447922,88.4619506866277,88.6455996313654,127.195665122456,86.5450951483022,93.6318657285486,130.57166717…
ENSG00000047230,58.9645563366226,53.1290912740498,81.7323416812685,78.2551709012615,109.818660359228,111.76727671405,98.6647660026156,99.5388928046832,124.555462938302,117.266244862041,133.29900176771,125.666857603502,110.345232058993,114.604192148933,126.08239870512,132.336335973818,92.6229614006861,97.9825193703904,92.244154921867,94.6267992950958,97.6978135952483,102.716985316649,88.0908095844…
ENSG00000047249,31.059237233128,25.2022612453826,32.5862804574014,30.5350736202796,36.3767140374871,39.1707745493167,28.2211858411029,30.0174185982828,22.8789840651073,25.5208380265548,35.1969274330469,38.1726001063517,31.9154308074408,34.1234119275424,28.4602640536441,25.7695476417556,28.407663705226,28.4895805309563,28.4321497209926,27.5128638037273,28.8561915185196,30.1558850707921,28.50196850…
ENSG00000047315,201.439379670927,195.435414647146,212.751081711544,204.809303038392,187.621222243821,181.021206117242,198.532760858922,194.40526290303,197.491106239024,192.872113259936,202.943985837356,204.965450474337,203.595169002318,213.024450988179,182.111400468559,188.088077615113,214.928025833461,191.168691638734,180.889754553232,189.407588499541,186.520411247453,189.684831927805,206.486218…
ENSG00000047346,13.7126875201448,12.208163971256,8.30795780826081,7.99555837687415,17.9014744159242,16.3994976113139,7.76629532836553,6.7256008651813,17.3013435399181,14.9977355270926,16.2255339230358,13.8809454932188,9.32183375068816,8.72286574996662,16.1846320883374,15.7974238416893,15.6221594905729,13.956288184152,13.3253433529464,14.3980565241521,14.2754796120911,13.4478946937316,13.060567907…
ENSG00000047365,1.37126875201448,1.15270217754349,17.0369269919402,18.5598255535586,2.18030778142667,2.08910797596356,9.18829306454513,9.62822860699638,4.08553286876917,3.85744226519872,4.61803657809481,3.24873192394482,22.2460032558795,20.8471005345114,3.63468432492322,3.91644466075213,0.0822218920556468,0.180313800828838,0.534438904529936,0.102659939566147,0.704382217701862,1.07870813051323,0.1…
ENSG00000047410,343.845639567631,340.571097910575,334.788245732888,350.972451647313,322.570798610019,313.261740995736,333.841314678473,339.253466799461,345.387396088468,331.462298963996,411.254879049254,362.528948785661,280.476597868163,280.804958120781,316.286115217847,325.690221536161,283.089974347592,255.865283376121,242.421487094779,284.26537265866,260.010955961014,275.597941700236,296.039539…
ENSG00000047457,2.39972031602534,1.25749328459289,1.99278717698148,1.15772790977363,1.60654257578807,2.29801877355992,0.546922206222925,1.48671177019797,2.55789883957722,2.37618443536241,5.24209557513464,3.69174082266457,3.57073631806021,3.20935626649715,2.571710607257,3.35695256635897,3.65887419647628,2.59651873193526,4.02610641412552,2.77181836828596,2.67665242726708,3.18818180796133,3.50322524…
ENSG00000047578,20.6375947178179,23.4208124255426,16.50364591641,14.8333888439747,20.0817821973509,16.9217746053048,11.594750771926,9.9114118013198,16.8039743211114,18.3922847204675,20.2195115040908,20.8952530562815,10.5542117719656,11.603057271182,19.1335269179921,18.8581747110166,15.2110500302947,18.0674428430495,14.1804456001943,16.4769203003666,14.627670720942,15.197798994342,16.1896623020108…
ENSG00000047579,8.15904907448615,10.8982751331384,8.89737373384688,10.7089831654061,7.74583027612106,7.1029671182761,7.43814200463177,7.43355885098985,7.88685475536309,7.19027238233042,6.61502536862229,7.08814237951598,6.88867714457633,6.30899095123372,10.8354740252428,9.14934130831171,5.71442149786745,7.75349343564002,9.51301250063286,6.39058123799264,8.0064778745445,7.81464112327364,6.870402909…
ENSG00000047597,3.56529875523765,3.30091987205635,9.76746390971203,8.68295932330225,12.6228345240491,11.0722722726069,13.7824395968177,13.0264269388775,8.73948770188883,8.05433944973493,11.732309144349,11.2967269173536,16.0525137130494,16.0193509370456,9.05242133754463,8.35947011622724,8.30441109762032,11.323706692051,11.2588462554307,10.4199838659639,11.0118420034058,10.739138721554,7.5846527171…
ENSG00000047617,2.12546656562244,1.10030662401878,3.03128190301408,2.96667776879493,2.98357906932071,1.67128638077085,2.07830438364711,1.76989496452139,2.38026697571769,2.25274628287605,2.62104778756732,2.28887931005203,2.9387475892,2.63331796225408,2.26310533438616,3.0607508693273,1.84999257125205,1.87526352861991,1.85272153570378,2.36117861002138,1.45572324991718,2.08550238565892,2.006701839955…
ENSG00000047621,14.3297584585513,12.5749328459289,15.4090163403216,13.8565559201032,17.4998387719772,16.5039530101121,18.704739452824,18.4069076310225,18.2960819775315,17.4973581149414,21.0931940999465,17.8680255816965,15.6417210392903,17.582883477134,15.7045794416494,13.4936328647763,21.5421357185795,16.6249324364188,16.0331671358981,18.3761291823403,18.4078552892753,16.9716745867415,21.18941095…
ENSG00000047634,3.63386219283837,4.87278647779746,2.38573112737219,2.7857827828928,5.79502857694983,8.0430657074597,5.35983762098466,4.60172690775562,3.16184717669962,2.93165612155103,1.87217699111952,2.06737486069216,10.3330157168645,9.51834721773088,3.12034220347182,2.53417007460432,8.05774542145338,7.03223823232467,7.09022280009715,8.95707972714631,8.0064778745445,7.23933012033325,8.7410571672…
ENSG00000047644,76.6539232376094,79.9556146786982,61.9728744616212,59.6229873533421,135.12170592789,141.641520770329,139.683931469335,123.821851717917,121.038352033883,120.722513131659,68.5216778749743,69.7739015483604,153.731258295247,143.022081824924,92.4787134369616,93.1060667669562,150.096063947583,121.964254880626,108.384209838671,142.876970891185,117.584871541698,106.001052291767,148.291864…
ENSG00000047648,0.822761251208688,1.3622843916423,0.44907880044653,0.253252980262982,1.60654257578807,2.08910797596356,1.31261329493502,0.849549582970269,1.77631863859529,2.06758905414652,1.62255339230358,1.25519187970595,0.947983093290321,1.34408937656718,1.40586846530049,1.57974238416893,0.822218920556468,1.2261338456361,0.855102247247898,0.949604440986858,1.08005273380952,0.767081337253854,1.5…
ENSG00000047662,0.822761251208688,0.733537749345855,1.17883185117214,1.08536991541278,0.745894767330176,0.52227699399089,0.43753776497834,0.49557059006599,1.42105491087623,1.45039829171472,0.624058997039839,1.47669632906583,0.379193237316128,0.384025536162053,1.6801842634079,1.51391978482856,0.616664190417351,0.324564841491908,0.24940482211397,0.769949546746101,0.516546959648032,0.527368419362025…
ENSG00000047849,332.464108925911,320.922765338811,261.391929284909,253.94038120941,350.97217628913,370.816665733532,282.102473969785,270.581542176031,356.258466156671,352.477644424799,376.806822412655,340.230834216767,304.492169564851,291.77711629684,307.130825456012,299.821939995394,366.298529107906,329.180874793126,281.649302687276,322.146890358569,307.157605732525,311.051482256438,357.70310594…
ENSG00000047932,69.3176354143319,73.9825215768819,41.0907102408575,43.7404075911351,73.212440239485,68.5227416116047,64.9743580992834,56.919822059008,59.1869370379951,62.2745479293682,76.2600094382683,72.7272942064921,1.45357407637849,1.78297570360953,74.0995549637649,72.8656174697918,81.8930044874242,49.0092910652781,50.023481464002,76.2506701127555,54.0730749122463,57.5311002940391,83.567227470…
ENSG00000047936,0,0,0,0.036178997180426,0,0,0,0,0,0,0,0,0,0,0,0,0,0,0,0,0.0234794072567287,0,0,0,0,0,0,0,0.0332617595703645,0,0,0,0,0,0.0332588258031416,0.0686516961345491,0,0,0,0,0,0,0,0,0,0
ENSG00000048028,320.876887971388,327.157836208251,178.873699702859,175.395778330705,223.768430199053,230.010788153588,194.157383209138,201.414046962535,188.041091081697,180.620876625665,221.540943949143,224.384007201553,202.267992671711,197.087391237453,209.44011185501,208.690551208649,303.727669253559,299.573348697031,272.029402405738,280.672274773845,280.226725609058,271.690621138599,304.882632…
ENSG00000048052,11.930038142526,15.1423149686394,16.9807921418844,17.0764866691611,19.4506404711484,21.4133567536265,10.9384441244585,10.1237991970624,12.5052832157108,13.3313204685268,20.7187587017226,17.0558426007103,10.3014162804215,11.9322220164638,23.1796849400764,20.5366509941961,13.4021684050704,11.792522574206,10.7244073509007,13.0891422946837,14.2050413903209,13.0643540251047,12.24428241…
ENSG00000048140,45.0461785036757,39.2966651435279,57.2294796319047,53.8343478044739,42.5733782583839,47.9450280483637,41.1285499079639,38.7253018237281,46.5750747039685,47.8322840884642,48.1773545714755,47.8449610617328,44.9343986219612,50.1153324691479,47.8338172949801,47.5239167237486,36.9587404790132,46.9176509756635,42.042527156355,38.6001372768712,44.1647650499068,42.9565548862158,37.7872160…
ENSG00000048162,41.2066259980351,39.7682251252503,41.0345753908017,38.7477059802363,31.3849567484313,35.0970139961878,53.9265295335804,54.5127649072589,46.6461274495123,45.0857851956427,37.5683516217983,38.9847830873379,48.2523394484773,49.6215853512252,25.71710607257,26.5594188338401,38.6854002121818,34.3317476778107,30.9261979421323,30.4900020511456,28.9735885548033,31.8099042042458,37.54913273…
ENSG00000048342,18.3064378393933,18.1812570730723,24.7274014495871,25.9403409783655,20.3112882796063,17.8618731944884,20.564274953982,18.1237244366991,20.4276643438458,19.5649471690879,17.9728991147473,18.0895300310564,17.8852810267441,17.774896245215,18.7906321703578,18.232860017283,18.6643694966318,19.077200127691,17.6008545891859,21.6099172786739,18.3374170675052,19.1770334313464,19.4207923832…
ENSG00000048392,200.136674356513,207.748369725451,101.828618001251,100.071106201058,141.605252751606,135.478652241237,126.010876313762,118.582962622933,135.994954970855,132.541716232228,135.920049555277,128.9894243439,105.068126173011,105.689313630885,157.663004962236,151.062865486154,174.310411157971,130.583254560244,127.552751881145,163.17797394039,136.814506084958,129.181291451907,174.20892922…
ENSG00000048405,5.1422578200543,4.34883094255042,8.67283433362362,7.34433642762648,8.49172504345124,10.1321736834233,8.86013974081138,10.9025529814518,9.62764702118647,8.42465390719401,6.24058997039839,7.97416017695547,12.0709847212301,9.32633444964985,7.71513182177099,6.77972773205831,7.23552650089692,7.89774447630309,8.23035912976102,6.92954592071491,8.19431313259833,8.17421050011138,8.74105716…
ENSG00000048462,0.068563437600724,0,0,0,0,0,0,0,0,0,0,0,0,0,0.0342894747634266,0.098733899010558,0,0.0360627601657675,0.142517041207983,0,0,0.0479425835783659,0,0.0942665704959114,0.0311292428574341,0,0.0332358382176444,0.0584478028681856,0.066523519140729,0,0.108653245914312,0,0,0,0,0,0,0.0312234951555498,0,0,0,0,0,0,0.0542508821193433,0
ENSG00000048471,8.91324688809412,11.2650440078113,10.9462957608842,11.5772790977363,15.3769075111144,14.101478837754,9.51644638827889,10.1945949956432,15.1697611736038,14.596561531512,12.3563681413888,11.8874054489799,12.7345728865333,10.6155630353367,13.1328688343924,12.1442695782986,11.881063402041,13.5956605824944,11.4013632966386,11.2155983976015,10.730089116325,11.002822931235,10.64572332043…
ENSG00000048540,2.94822781683113,3.72008430025398,1.09462957608842,1.37480189285619,2.40981386368211,1.46237558317449,2.51584214862545,2.12387395742567,2.20263511185816,2.43790351160559,3.12029498519919,3.83941045557115,0.315994364430107,0.411455931602199,0.617210545741679,0.82278249175465,0.534442298361704,0.072125520331535,0.142517041207983,0.846944501420711,0.633943995931676,0.599282294729574,…
ENSG00000048544,50.18843632373,45.7413182270665,49.791611999509,47.1774123232755,49.6306902877387,48.3628496435564,41.0191654667193,40.7075841839921,57.9079876182065,56.4729547625093,51.6720849548986,51.9058759666639,41.5848583590021,44.3823798221572,49.8226068312589,44.0353189587089,44.7698202242997,45.0784502072094,40.1185471000472,42.4755499954932,47.0762115497411,44.2510046428317,45.405880615…
ENSG00000048545,5.41651157045719,6.44465308353858,8.36409265831663,5.68010255732689,6.82780594709931,6.68514552308339,2.73461103111462,3.82297312336621,6.21711523508352,8.39379436907242,6.73983716803026,6.42362903143635,2.84394927987096,3.78539457074023,5.21200016404085,4.37720285613474,3.78220703455975,6.09460646801471,4.95246718197741,5.33831685743963,5.799413592412,6.52019136665776,3.911367993…
ENSG00000048649,181.076038703512,177.306553127598,221.872994845614,235.850882619197,190.375295230887,191.884567592253,173.593108255156,168.352409025275,217.670085973467,208.209303706366,209.059764008346,185.177719664855,176.577650843544,180.409710809844,173.607610727229,187.59440812006,170.281538447244,170.901420425572,154.95165305338,172.648353365367,162.360101180279,166.408707600508,177.3040117…
ENSG00000048707,150.770999283992,157.920198323458,117.321836616656,109.58618245951,132.023373817441,140.701422181146,93.4143128228755,98.1937726316469,111.979126977047,106.650563748214,193.832724480574,131.942817002032,133.002027988632,109.913594528667,121.316161713003,131.875577778435,123.90839132786,165.672320201536,120.961338725276,137.666978958203,124.440858460662,135.8453105693,149.890423875…
ENSG00000048740,44.4976710028699,41.1829050704173,64.5270101391608,70.2596125243874,50.2618320139411,49.30294823274,55.8954494759829,50.9021791796353,42.9158583084622,40.6728712442553,43.6841297927887,42.2335150112827,49.6111152155268,48.2226351837778,46.7022646277871,50.1897319970336,47.729808338303,39.3444713408524,38.0520500025315,46.7616024723799,43.4838622394616,38.9533491574223,46.664320752…
ENSG00000048828,84.8129723120956,91.2206586865095,74.2664066238449,81.5474596446803,96.8515667117952,95.2633237039383,112.009667834455,106.901655857092,101.889637109826,98.3493479935067,105.341158700325,106.248300876286,111.451212334499,105.140705722082,76.8770024196025,81.5212892830507,92.4996285626026,70.2141940427494,72.7193202763733,82.0766216831343,70.461701177443,78.0744973573688,92.9885225…
ENSG00000048991,93.1777116993839,96.3554229319305,86.6160736361245,88.8194380779459,102.072830083106,104.768764994572,87.0700152306896,82.4771053466969,115.638343372553,115.044358117287,113.204302063027,107.281988306632,84.5600919214966,80.3161978487493,94.2617661246598,95.5415029425499,101.544036688724,84.7474863895537,73.1468713999973,101.915655004292,82.8118693944823,87.8787556991447,105.60693…
ENSG00000049089,2.81110094162968,3.77247985377868,5.83802440580489,4.95652261371837,4.7048746862365,2.71584036875263,3.06276435484838,3.75217732478535,1.38552853810433,1.69727459668744,2.24661238934342,2.14120967714545,7.83666023786665,8.33884021380457,3.39465800157924,4.08100115910306,1.60332689508511,3.53415049624522,4.27551123623949,2.56649848915367,4.53152560054865,3.52377989300989,1.49652340…
ENSG00000049130,31.6077447339338,33.8475275769587,27.2815371271267,26.663920921974,28.3440011585467,25.4871173067554,25.1584214862545,23.9289799203292,22.4171412190726,19.41064947848,31.8270088490318,37.2127474924589,19.7496477768817,18.515516922099,24.6198428801403,23.0379097691302,27.5854447846695,14.9299827086278,13.7528944765704,25.9472997253436,16.2242704143996,19.129090847768,24.21646966183…
ENSG00000049167,23.3115687842462,24.9402834777591,27.197334852043,28.0749018120106,31.499709789559,32.1722628298388,25.7053436924775,25.6280790862698,36.9119013100101,31.6927456508727,29.8300200585043,30.8629532774758,27.6179074511913,28.1435857215904,28.0145008817196,29.6530810028376,34.0809742570656,26.7225052828337,24.3704140465651,30.4900020511456,26.9543595307246,30.1079424872138,31.42699152…
ENSG00000049192,3.22248156723403,3.30091987205635,2.63833795262337,2.09838183646471,2.63931994593755,2.29801877355992,1.53138217742419,1.20352857587455,2.4513197212615,2.16016766851129,3.4947303834231,4.13474972138432,2.49635547899785,2.55102677593364,3.66897379968665,3.25821866734841,2.67221149180852,2.7768325327641,3.3135212080856,3.51610293014053,3.00536412886128,3.04435405722623,2.21077321350…
ENSG00000049239,10.7644597033137,13.8324261305218,14.9880049649029,17.2212026578828,21.6309482525751,21.8311783488192,10.8290596832139,8.70788322544526,16.0223941201295,16.9418864287528,17.4736519171155,14.1024499425787,16.5265052596946,15.909629355285,16.6989742097888,18.0024809195917,16.0743798968789,28.9944591732771,23.6934581008272,17.7345045600519,23.8550777728364,21.4063635677404,14.2849961…
ENSG00000049245,40.9323722476322,37.7771940913115,33.9615842837689,35.9619231973435,43.6061556285334,40.4242393348949,34.4560989920442,32.4952715486128,39.2921682857278,37.8646532751907,33.4495622413354,36.1052252456595,45.8823817152515,43.8612023087944,34.7009484605877,36.1366070378642,40.6587256215173,39.5247851416812,37.2682062758876,37.6248678509928,38.7645013808592,39.5286601603627,38.263382…
ENSG00000049246,27.082557852286,28.9223455456366,23.21176049808,20.7667443815645,15.8359196756253,16.1905868137176,14.5481306855298,11.6813067658412,14.317128227078,12.8684273967029,9.23607315618961,9.15551724020814,6.47788447081719,6.41871253299431,18.3448689984332,18.6607069129955,16.2388236809902,21.4934050587974,19.2398005630777,15.732635738512,21.0610283092857,18.0743540090439,14.25098425324…
ENSG00000049247,0,0,0,0.036178997180426,0.0573765205638597,0,0,0,0,0.0617190762431796,0,0,0.0947983093290321,0.0548607908802932,0,0.065822599340372,0,0.180313800828838,0.178146301509979,0,0.140876443540372,0,0,0,0,0.0258032267089819,0.0664716764352888,0,0.0997852787110935,0,0.144870994552416,0,0,0,0,0.0686516961345491,0,0.0936704854666495,0,0,0,0,0,0,0,0
ENSG00000049249,0,0,0,0,0,0,0,0,0,0.0308595381215898,0,0,0,0,0,0.032911299670186,0,0,0,0.0256649848915367,0.0234794072567287,0.0479425835783659,0,0,0,0.0774096801269457,0.0332358382176444,0.0292239014340928,0,0.0613215624550149,0.036217748638104,0,0,0,0,0,0,0,0,0,0.050688859060185,0,0.153190013522593,0,0.217003528477373,0.382378115473493
ENSG00000049283,2.53684719122679,1.93863548041404,1.93665232692566,2.42399281108854,2.63931994593755,3.34257276154169,0.43753776497834,1.69909916594054,2.4513197212615,2.80821796906467,4.74284837750277,4.13474972138432,3.50753744517419,4.41629366586361,2.98318430441812,2.66581527328507,1.43888311097382,0.937631764309956,1.06887780905987,1.92487386686525,1.26788799186335,1.77387559239954,1.6325709…
ENSG00000049323,64.6553216574827,61.9839398197247,76.0346544006032,76.3738630478794,75.5648775826033,78.654915295028,56.8799094471842,56.0702724760378,49.9500801172996,51.9674621967572,107.46295929026,99.2339933132237,87.5936378200257,81.9620215751581,93.7474240032084,94.7845430501357,55.7464428137285,53.6253243664963,49.2752669976601,58.8754753411852,52.8286663276397,61.582248606411,58.500460419…
ENSG00000049449,186.149733085966,188.571597135409,209.018114182832,206.762968886135,205.694826221437,193.555853973024,189.891390000599,204.387470502931,184.133190076788,178.738444800248,215.799601176376,215.376159594251,229.980698432232,221.281000015663,205.531111731979,208.131059114256,164.361562219238,196.14535254161,187.08924584578,155.452813488038,214.366988253933,196.804305589192,158.5974691…
ENSG00000049540,0.34281718800362,0.890724409919966,2.24539400223265,2.31545581954727,1.95080169917123,0.835643190385424,0.765691088712094,1.20352857587455,1.66973952027957,1.75899367293062,0.873682595855774,0.664513348079623,0.91638365684731,0.987494235845278,1.50873688959077,1.38227458614781,1.72665973316858,2.01951456928298,1.31828263117384,1.30891422946837,1.22092917734989,1.10267942230242,1.1…
ENSG00000049541,61.7756572782523,57.5827133236496,71.4596641210541,62.5534861249566,63.6879378258843,66.5380890344394,59.5051360370542,62.8666691397999,72.047483981425,72.9210885813167,59.4104165181926,65.7868214598827,66.2324187845504,71.2093065626206,64.1898967571346,63.9795665588416,53.3620079441148,55.8972782569397,49.1327499564521,48.1988416263059,50.7859578963043,51.2266505534839,49.8614389…
ENSG00000049618,135.001408635825,125.277768477567,185.413409734361,185.345002555323,188.94088221679,197.107337532162,170.202190576574,161.34362496577,163.456841123539,174.418109463225,201.196620645644,189.903147917866,190.29180625981,190.065210004776,155.845662799774,157.645125420191,153.261606791726,129.93412487726,115.723837460882,156.402417929025,129.019342875724,133.903635934376,162.100694393…
ENSG00000049656,60.6786422766407,59.102184375866,69.9440231695471,70.8384764792742,68.5649420738124,72.178680569541,80.3975643147699,79.2912944105584,86.0804012263278,84.9254489106151,79.7547398216914,75.3853475988106,81.0841539127655,81.9345911797179,59.800843987416,62.2352676763217,72.4374869010248,58.9626128710299,56.8999287022872,61.2879839209896,59.1915856942132,60.6953108102112,70.778754727…
ENSG00000049759,104.902059529108,105.315062584655,103.540730927953,105.859745749927,115.900571538997,113.438563094821,112.884743364412,102.653907942241,101.143583281616,100.231779818924,119.944139231057,113.336443255802,139.543111332335,127.907933937404,110.17208241489,115.452839243012,52.1286795632801,48.2159103416312,41.650605293033,52.792873921891,59.3089827304968,58.6337797163415,51.119879075…
ENSG00000049768,0.411380625604344,0.157186660574112,0.617483350613979,0.578863954886817,0.229506082255439,0.417821595192712,0.43753776497834,0.424774791485134,0.888159319297645,0.524612148067026,0.499247197631871,0.51684371517304,0.347593800873118,0.356595140721906,0.342894747634266,0.592403394063348,0.328887568222587,0.901569004144188,1.03324854875788,0.436304743156124,0.657423403188405,0.623253…
ENSG00000049769,4.73087719444995,3.9820620678775,5.58541758055372,5.10123860244007,7.6884537555572,8.56534270145059,3.39091767858213,3.53978992904279,4.01448012322536,4.13517810829303,4.11878938046293,4.13474972138432,3.76033293671827,3.73053377985994,5.72634228549225,5.92403394063348,3.49443041236499,5.12091194353899,5.0237257025814,5.23565691787349,5.799413592412,5.00999998393923,3.673284723985…
ENSG00000049860,30.8535469203258,28.7651588850624,28.6568409534942,28.2919757950932,52.5568928364955,54.9435397678416,42.2223943204098,47.9287556392393,46.2908637217933,48.5111939271391,48.6766017691074,46.5897691820269,42.1852476514193,46.0007731531259,42.6561066057027,42.9492460695927,41.193167919879,40.8591072678146,37.5532403583035,37.8301877301251,39.4454041913043,38.9533491574223,40.7462509…
ENSG00000049883,23.4486956594476,23.5256035325921,20.3769505702613,20.7667443815645,22.5489725815969,22.0400891464155,21.876888248917,19.3272530125736,25.2237246680531,24.1321588110832,21.9668766958023,25.6945161257454,19.5916505946666,18.70752969018,27.9459219321927,27.4480239249351,20.5554730139117,18.8968863268622,17.4939668082799,20.8399677319278,18.7365669908695,19.3688037656598,21.597553701…
ENSG00000050030,2.26259344082389,2.61977767623519,1.93665232692566,2.06220283928428,4.01635643947018,2.8202957675508,0.984459971201264,1.20352857587455,2.84210982175246,2.34532489724082,2.87067138638326,2.28887931005203,1.07438083906236,1.26179819024674,2.09165796056902,1.90885538087079,1.56221594905729,1.83920076845414,1.6745752341938,1.46290413881759,2.67665242726708,2.30124401176156,1.49652340…
ENSG00000050130,30.9906737955272,26.9837100652225,29.7514705295826,29.8114936766711,31.6144628306867,27.4717698839208,28.5493391648367,26.4068328706592,31.3342607848209,31.2607121171705,36.4450454271266,32.8564933217147,28.3762939258236,31.4078027789679,31.6148957318794,29.0606776087742,30.1343234383945,28.4895805309563,26.0806185410609,28.8731080029788,27.611782933913,29.1730621074356,27.8217305…
ENSG00000050165,21.2546656562244,20.3818703211098,20.4892202703729,18.5236465563781,23.8686325545656,22.2489999440119,13.5636707143285,13.23881433462,19.5039786517763,18.4231442585891,21.7172530969864,18.3110344804163,16.0209142766064,15.6901861917639,22.8367901924421,23.1695549678109,18.4999257125205,18.7526352861991,18.5984738776418,18.9920888197372,18.6426493618426,18.0024401336764,20.23707787…
ENSG00000050327,22.6944978458396,21.2725947310298,12.4058018623354,9.65979224717375,53.7044232477727,56.928192345007,50.6449962962428,44.4597615087774,53.0764009212273,55.3928709282537,39.1909050141019,34.702363733047,27.3335125232043,24.7696470824524,24.9284481530112,27.6454917229562,40.9876131897399,43.9244418819048,41.0805371282011,36.726593379789,42.3803300983954,35.381626680834,41.7325958919…
ENSG00000050344,63.832560406274,75.5019926290983,70.7018436453006,74.818166169121,41.9996130527453,39.901962340904,54.035913974825,52.6012783455758,53.0764009212273,49.3752609945437,29.2059610614644,28.7217436003304,107.122089541806,103.714325159194,37.9584485631133,39.7897613012549,31.1209861430623,104.906569322218,102.897303752164,28.5394631993888,102.13542156677,92.385358555511,28.467956610888…
ENSG00000050393,34.1445919251605,36.8864696813915,46.0305770457693,47.2497703176364,46.4176051361625,41.3643379240785,43.0974698503665,51.6101371654438,47.4987603960381,45.3943805768586,44.3081887898285,48.140300327546,47.33595579163,45.6167476169638,42.999001353337,43.6074720629964,42.9198276530476,40.4984796661569,40.9380200869931,38.7797921711119,41.1828803283022,41.4463635034973,40.7462509197…
ENSG00000050405,64.9981388454863,68.3238017962139,206.211371680041,192.544622994227,54.9093301796138,56.5103707498143,109.056287920851,96.6362650628681,71.301430153215,68.0452815581055,43.6841297927887,46.368264732667,77.5766164675913,79.4109947992245,77.8713971877419,79.6782565015203,59.4464279562326,89.1110803696116,83.621873928784,62.930542954048,87.5547096603415,82.6290427973136,63.1600901151…
ENSG00000050426,15.0839562721593,17.5001148772511,8.70090175865152,8.7553173176631,18.8768752655098,19.950981170452,10.8290596832139,10.7609613842901,18.2250292319877,17.1579031956039,14.3533569319163,18.237199663963,10.3962145897505,10.4235502672557,17.1104479069499,19.2201990073886,14.2654982716547,11.9367736148691,11.9358022011686,19.7363733815917,14.7215883499689,12.5369856057427,15.985590928…
ENSG00000050438,46.4174472556901,49.7757758484687,34.1019214089084,34.9489112762915,39.9914348330102,45.5425538760056,25.9241125749666,23.9289799203292,15.7026567651824,15.8309430563756,29.8300200585043,30.0507702964896,31.1570443328085,27.869281767189,42.4160802823587,44.1011415580492,38.6031783201262,42.7343707964345,41.1874249091071,44.1181090285516,42.3803300983954,40.4155979565624,41.1543936…
ENSG00000050555,11.5186575169216,11.0554617937125,11.1989025861353,11.1793101287516,14.5162597026565,14.5193004329467,14.5481306855298,13.3096101332009,14.8144974458847,17.8059534961573,9.48569675500555,10.2630394870075,9.54302980578923,7.57078914148047,10.2182634795011,11.5518661842353,13.0732808368478,15.1102965094566,15.2493234092542,12.7554974910937,13.5710973943892,12.2253588124833,9.9654854…
ENSG00000050628,4.38806000644633,4.0344576214022,1.59984322659076,2.17073983082556,2.06555474029895,1.98465257716538,1.31261329493502,1.76989496452139,2.55789883957722,1.66641505856585,1.99698879052748,1.99354004423887,1.89596618658064,1.75554530816938,3.49752642586952,2.830371771636,1.97332540933552,1.47857316679647,1.88835079600577,1.97620383664833,1.47920265717391,1.55813396629689,0.9183211809…
ENSG00000050730,0.068563437600724,0,0,0,0,0,0,0.0707957985808557,0,0,0,0,0.0947983093290321,0.0822911863204399,0.10286842429028,0,0,0,0,0.0256649848915367,0,0.0239712917891829,0,0,0.0311292428574341,0.0258032267089819,0.0332358382176444,0,0,0,0,0.117092120235029,0.167124176062144,0.134807984393819,0.0997764774094248,0.0686516961345491,0,0.0312234951555498,0.117647328720342,0,0,0.431484891610456,0…
ENSG00000050748,71.5116654175551,65.8088152270281,56.0787152057605,54.7388227339846,67.4174116625352,66.6425444332375,55.1297583872708,60.5304077866317,66.754054438411,63.416350839867,69.644984069646,71.3982675103328,58.3009602373547,57.1923744927057,69.7447916688098,65.1972846466385,65.5308479683505,53.5531988461648,54.5483975223555,60.3383794800028,52.9930221784368,60.407655308741,64.1124231917…
ENSG00000050767,2.81110094162968,3.45810653263046,2.35766370234428,1.15772790977363,2.69669646650141,2.92475116634898,1.20322885369043,1.06193697871284,2.91316256729628,3.27111104088852,1.99698879052748,2.14120967714545,2.08556280523871,2.11214044889129,3.0860527287084,4.41011415580492,1.56221594905729,3.96690361823443,4.59617457895745,2.97713824741826,3.80366397559006,3.59569376837744,1.90466615…
ENSG00000050820,45.2518688164778,43.2787272114054,67.5863594672028,56.6201305873667,43.778285190225,52.6455209942817,68.6934291015993,64.6365641043213,48.3513933425638,53.1709841834992,36.9442926247584,35.21920744822,70.3087460856988,69.9475083723739,44.0276855962398,44.4302545547511,45.1398187385501,82.8000973406022,77.3867533759348,37.5222079114266,62.149991008561,63.4040667823889,42.9910360288…
ENSG00000051009,12.2728553305296,10.5315062584655,12.0689927620005,11.4325631090146,14.8605188260397,16.0861314149194,11.594750771926,12.8140395431349,14.6013392092533,14.442263840904,12.3563681413888,14.7669632906583,11.3441976830408,11.4933356894214,13.1328688343924,13.1316085684042,15.3754938144059,10.5663887285699,11.4013632966386,13.8334268565383,11.2701154832298,11.3144497244943,14.59110320…
ENSG00000051108,15.2210831473607,14.9327327545406,15.0160723899309,15.4122527988615,13.1392232091239,13.474746444965,20.017352747759,17.2033790551479,16.0223941201295,15.645785827646,18.7217699111952,15.209972189378,15.9893148401634,15.4981734236828,25.8885534463871,26.0986606384575,19.7332540933552,42.1573666337822,42.042527156355,17.7088395751603,37.82532509059,36.3165070606122,19.4548042788869…
ENSG00000051128,5.1422578200543,4.45362204959983,9.03771085898642,7.48905241634819,7.28681811161018,8.25197650505606,6.56306647467509,8.35390423254098,6.39474709894304,5.52385732376457,6.61502536862229,3.32256674039811,5.81429630551397,5.04719276098698,8.84668448896407,10.8278175914912,5.50886676772833,10.0975728464149,9.79804658304883,5.28698688765656,8.49954542693581,9.37277508957053,4.59160590…
ENSG00000051180,31.7448716091352,28.0316211357166,30.7057629805315,26.9533528994174,31.0406976250481,28.5163238719026,28.986876929815,26.3360370720783,29.8421531284009,31.291571655292,29.9548318579123,30.1984399293962,29.640271383544,30.502599729443,30.7233693880303,28.2378951170196,30.2987672225058,27.6601370471437,22.5176925108613,28.2314833806904,25.9447450186853,27.4231578068253,27.6516711166…
ENSG00000051341,62.3241647790581,70.1052506160538,42.6063511923646,44.6087035234653,79.0074688164348,81.7885772589733,53.3796073273574,54.7959481015823,89.8461967401498,82.5184049371311,95.7306501459112,84.5408648390187,47.6835495925031,38.4025536162053,67.3788179101333,72.2403027760583,71.9441555486909,47.6749689391447,47.3156576810504,71.348657998472,55.834030456501,58.0584687134011,72.10521865…
ENSG00000051382,95.5088685778085,99.8659250180856,61.9167396115654,63.1323500798434,75.277994979784,79.803924681808,67.3808158066643,62.1587111539913,66.8961599294986,67.4589503337953,82.6254112080746,78.781749155662,73.879482403759,72.1145096121455,89.941292304468,87.6427910217053,90.1563046390167,81.3575869339715,75.070851456305,77.6879092666816,82.4831576928881,83.2283250920432,92.988522549784…
ENSG00000051523,28.1795728538976,27.0885011722719,27.3657394022104,23.1907371926531,19.3932639505846,23.8158309259846,26.1428814574558,21.592718567161,23.7316170116331,26.7552195514183,17.7232755159314,21.1905923220946,19.9708438319828,17.1988579409719,24.51697445585,24.7163860523097,20.6788058519952,22.8277271849308,19.5604639057957,17.3751947715703,19.5818256521118,19.3688037656598,19.318756696…
ENSG00000051596,73.8428222959797,76.0259481643454,78.8694643284219,70.4405075102895,60.7043587565636,58.8083895233742,58.4112916246083,54.7959481015823,58.6185150736446,58.8799987359933,91.9862961636722,79.5200973201949,69.2975641195225,75.3512962740828,75.3682655300117,75.3668762447259,50.4020198301115,55.0317720129612,48.2420184489022,52.8698688765656,50.8798755253312,53.8634926502941,51.153890…
ENSG00000051620,36.9556928667902,32.9568031670388,32.7266175825409,31.5842645385119,39.8193052713186,35.201469394986,29.2056458123042,29.946622799702,37.6579551382202,36.3833954453544,40.4390230081815,41.1259927644833,43.8284183464558,39.4174782474907,38.2327643612207,36.6631878325872,46.1675923892457,35.7021325641098,31.6387831481722,38.9594470653527,37.1209428728882,38.4020094462711,40.88229850…
ENSG00000051825,63.9011238438747,65.7564196735034,48.3601733230857,47.3583073091777,55.5978484263801,54.6301735714471,47.2540786176607,46.2296564732988,46.8592856861438,47.1842337879108,68.3968660755663,60.3968798587924,41.8376538505462,38.8140095478075,59.2522123912012,63.2555179660975,44.5642654941606,47.1700902968239,47.1018821192384,48.4554914752213,49.7763433842649,49.141148167825,44.2494761…
ENSG00000052126,121.768665178886,125.487350691666,110.080440959456,114.578884070409,121.236587951436,119.392520826317,120.322885369043,122.4059357463,117.80545211164,109.890815250981,133.673437165933,125.223848704782,146.93737946,161.208434001742,126.802477675152,131.316085684042,112.315104548014,125.642656417534,123.312869905207,130.018813460525,123.971270315528,124.195262759757,117.068944629246…
ENSG00000052344,44.0177269396648,42.8595627832078,28.7410432285779,26.3383099473502,42.9750139023309,49.6163144291345,35.4405589632455,30.8669681812531,37.9776924931673,42.8638984508882,48.3021663708835,39.5016268025109,37.0029400747655,35.2206277451483,45.810738283938,47.2606263263871,29.9698796542833,43.0949983980922,35.2729676989758,27.8721735922088,39.7036776711283,33.943349173483,28.77406367…
ENSG00000052723,92.4920773233766,95.4646985220105,85.7459834602594,90.8454619200498,102.703971809309,98.5014410666818,88.4920129668692,89.5566852047825,104.092272221684,96.5286352443329,102.844922712165,108.094171287619,91.0695758287568,92.1661286788926,95.3590293170895,93.1718893662966,96.0762808670233,80.3838924094958,76.1397292653649,93.5745349145428,83.2110193178467,80.3517700773412,101.72957…
ENSG00000052749,62.3927282166588,55.1725178615132,69.7194837693238,67.6547247273967,56.1142371114548,54.7346289702453,86.8512463482004,85.0257540956078,73.4685388923012,75.0503967117064,67.1487480814866,65.0484732953498,80.2941680016902,72.772839102709,54.5202648738483,56.5416128333795,71.4097132503292,58.2774204278803,54.6909145635635,55.94966706355,52.0303664809109,52.8566983951484,74.894194094…
ENSG00000052795,22.6944978458396,22.477692462098,21.1347710460148,20.4049544097603,24.3850212396404,25.2782065091591,31.7214879609296,29.0970732167317,24.7974081947903,24.9962258784877,31.078138052584,28.2048998851573,28.0918989978365,25.7297109228575,24.5855534053769,25.7695476417556,23.3510173438037,15.6873006721089,13.9310407780803,22.8161715685761,17.7504318860869,19.8722008932327,25.37287411…
ENSG00000052802,166.060645868953,169.499615652417,269.250808292723,261.067643653954,178.096719830221,167.859825868672,228.941635524916,207.573281439069,170.881853032867,169.357145211285,171.741035985364,177.498898753713,271.913150592107,253.566575448715,123.750714421207,116.143976536086,225.370206124528,106.204828688185,116.151388584506,182.863017352199,111.808937356542,128.19846848855,213.424644…
ENSG00000052841,66.0951538470979,71.6247216682702,77.4660930770265,75.6502831042708,80.2697522688398,76.7747181166608,63.0054381568809,66.6896422631661,75.422489394756,73.9394533393291,64.9021356921432,64.0147858650037,57.9217670000386,55.3271076027757,78.4543182587201,81.8833135794228,57.3497697088136,78.5446916410417,73.8594566060372,69.6034390258475,75.6271707739233,72.2734447443866,57.9562700…
ENSG00000052850,0.34281718800362,0.157186660574112,0.168404550167449,0.217073983082556,0.114753041127719,0,0,0,0.106579118315717,0.0617190762431796,0,0.221504449359874,0.221196055101075,0.0548607908802932,0.0685789495268533,0.197467798021116,0.0411109460278234,0.324564841491908,0.106887780905987,0.102659939566147,0.281752887080745,0.239712917891829,0.0680237911849193,0.235666426239779,0.342421671…
ENSG00000053108,1.64552250241738,2.14821769451286,1.99278717698148,2.13456083364514,3.67209731608702,3.76039435673441,1.75015105991336,1.62830336735968,3.44605815887486,3.67228503646919,1.49774159289561,2.43654894295862,3.15994364430107,3.62081219809935,3.80613169874036,3.94935596042232,7.0299717707578,11.4318949725483,9.76241732274684,10.8306236242285,9.74395401154243,8.27009566726811,7.07447428…
ENSG00000053254,390.537340573724,412.038632918272,265.068761963564,268.773770053385,341.046038231582,343.031529653216,200.282911918835,192.77695953567,315.829453942243,313.162592857893,421.239823001891,382.612018860956,198.886852972309,204.630749983494,356.507669115347,358.568609906676,274.127788113526,241.836869671637,213.811191072277,299.510373684233,247.566870114948,259.824831702954,292.910444…
ENSG00000053328,0,0.104791107049408,0.112269700111633,0.144715988721704,0.229506082255439,0,0.109384441244585,0.283183194323423,0.142105491087623,0.216016766851129,0,0.295339265813166,0.0315994364430107,0.24687355896132,0.240026323343986,0.131645198680744,0.287776622194764,0.324564841491908,0.213775561811974,0.0769949546746101,0.164355850797101,0.167799042524281,0.0680237911849193,0.0942665704959…
ENSG00000053371,9.66744470170208,13.4656572558489,13.7249708386471,10.9622361456691,10.9015389071333,16.8173192065067,8.31321753458845,7.15037565666643,11.9723876241323,14.1336684596881,14.3533569319163,14.2501195754852,10.3962145897505,11.9047916210236,14.4358688754026,14.4480605552117,11.9632852940966,14.425104066307,11.2944755157327,9.77835924367548,10.4013774147308,11.4103348916511,9.82943782…
ENSG00000053372,42.5093313124489,34.4238786657305,62.8429646374863,55.2453286945106,46.5323581772902,42.5133473108584,69.6778890728006,76.3178708701625,57.5882502632593,57.4296004442786,45.8059303827241,57.4434872006607,73.816283530873,74.3912324336776,43.7190803233689,42.7517782715716,57.1031040326467,65.5260352211996,58.645762457085,45.7606680616099,54.2609101703001,58.3461242148713,56.05160393…
ENSG00000053438,37.6413272427975,33.1663853811376,43.1676996929227,35.7086702170805,10.3851502220586,10.0277182846251,12.907364066861,14.5131387090754,15.3473930374633,18.9168968685345,12.9804271384286,16.6866685184439,7.83666023786665,7.65308032780091,22.185290171937,23.5974018635234,2.17888013947464,1.3343221261334,3.17100416687762,1.66822401794989,4.10889626992753,4.9141148167825,2.61891596061…
ENSG00000053501,3.56529875523765,3.87727096082809,4.65919255463275,3.69025771240346,5.27863989187509,4.38712674952347,3.93783988480506,5.80525548363017,4.08553286876917,4.13517810829303,5.24209557513464,3.54407118975799,4.29752335624945,3.81282496618038,4.49192119400889,4.08100115910306,3.94665081867105,4.36359398005787,3.84796011261554,3.92674268840511,4.76631967311594,3.49980860122071,3.8433442…
ENSG00000053524,13.8498143953462,17.7620926448746,5.83802440580489,4.41383765601198,8.8359841668344,8.25197650505606,5.03168429725091,6.7256008651813,7.38948553655641,6.44964346741227,8.4872023597418,7.38348164532914,6.47788447081719,5.15691434274756,11.7955793186188,11.7822452819266,6.41330758034045,7.64530515514272,7.5177739237211,8.70042987823094,6.97338395524844,7.59889949717099,9.52333076588…
ENSG00000053702,1.23414187681303,2.09582214098816,1.43143867642332,1.6642338702996,1.89342517860737,1.35792018437631,2.07830438364711,2.83183194323423,1.88289775691101,1.69727459668744,0.998494395263742,1.55053114551912,2.0539633687957,2.55102677593364,1.92021058675189,1.71138758284967,1.35666121891817,1.98345180911721,2.31590191962972,1.89920888197372,2.3714201329296,2.1094736774481,1.2244282413…
ENSG00000053747,2.39972031602534,2.51498656918579,1.51564095150704,1.23008590413449,2.29506082255439,1.77574177956903,1.20322885369043,1.48671177019797,3.01974168561199,2.22188674475446,3.12029498519919,3.32256674039811,3.82353180960429,3.59338180265921,3.39465800157924,3.98226726009251,3.32998662825369,2.74076977259833,2.38716044023372,2.66915842871982,2.18358487487577,2.58889951323176,3.0610706…
ENSG00000053770,63.9011238438747,61.04081985628,59.8397501595002,61.7575481869872,67.5321647036629,61.8375960885214,61.8022093031905,59.9640413979848,78.3356519620523,70.6992018365622,87.6178831843933,85.7222219022713,63.7676627419956,61.0326298543262,66.6587389401014,66.6782931317968,66.353066888907,48.7207889839519,50.629178889136,64.5987669719979,54.354827799327,61.198707937784,62.479852203348…
ENSG00000053900,39.8353572460206,37.7247985377868,43.5606436433134,44.6087035234653,37.4668679282004,35.3059247937842,33.0341012558646,36.6722236648833,44.5855978287418,43.9748418232655,37.1939162235744,38.0987652898984,34.8857778330838,39.9935165517338,36.2096853501785,36.2024296372046,39.1376206184879,26.5782542421707,32.3513683542121,39.3187568538342,32.0024320909213,33.8234927145371,39.215715…
ENSG00000053918,1.988339690421,2.61977767623519,1.90858490189775,1.44715988721704,1.26228345240491,1.25346478557814,0.328153323733755,0.424774791485134,0.817106573753833,0.833207529282924,1.49774159289561,1.40286151261254,1.86436675013763,1.70068451728909,2.77744745583756,2.43543617559376,0.575553244389527,1.91132628878568,1.60331671358981,1.10359435033608,1.33832621363354,1.72593300882117,0.5441…
ENSG00000054116,28.0424459786961,26.8265234046484,26.7201886265686,25.5785510065612,36.0898314346678,33.4257276154169,28.2211858411029,23.9997757189101,30.6592597021547,28.6685109149569,28.7067138638326,29.8292658471297,28.2498961800516,26.5800531815021,26.9858166388168,30.5745973936028,27.5443338386417,27.9486391284698,24.1922677450551,29.4120726857011,29.4431766999378,26.9677032628308,30.168551…
ENSG00000054118,425.641820625294,412.667379560568,513.633878010719,501.947406881231,421.028907897603,412.598825252803,393.783988480506,404.173214098105,433.705958799426,430.521416334299,475.532955744357,437.618957118658,473.896748335831,453.698740580025,423.98935544977,415.208956639067,378.87847859242,452.587640080382,413.584453585567,384.410143705437,412.932335424088,426.521194804932,370.0834359…
ENSG00000054148,35.515860677175,31.6469143289212,33.5405729083502,28.6537657668974,36.6062201197425,40.0064177397022,34.0185612270659,27.6103614465337,31.4408399031366,32.1864982608181,18.2225227135633,23.8486457144131,28.5342911080387,26.19602764534,27.8430535079024,28.2049838173494,25.1187880230001,29.319024014769,26.0093600204569,25.1773501785975,28.0344122645341,26.4163635516796,23.3321603764…
ENSG00000054179,2.87966437923041,3.72008430025398,1.96471975195357,1.33862289567576,0.745894767330176,0.208910797596356,1.53138217742419,1.2743243744554,0.42631647326287,1.23438152486359,1.74736519171155,0.664513348079623,1.1691791483914,0.960063840405132,1.88592111198846,1.21771808779688,1.10999554275123,2.95714633359294,1.46079967238183,1.30891422946837,2.0427084313354,1.965645926713,1.56454719…
ENSG00000054219,10.42164251531,12.7845150600278,11.7321836616656,8.71913832048267,5.96715813864141,8.14752110625788,8.09444865209928,7.15037565666643,5.04474493361062,6.81995792487134,8.4872023597418,9.96770022119434,9.92222304310536,9.7652207766922,17.4190531798207,15.6986899426787,6.74219514856304,12.4777150173556,11.2232169951287,9.31638951562782,10.9179243743789,11.793875560278,5.748010355125…
ENSG00000054267,58.4160488358168,59.2069754829154,91.8927495413713,96.0552375140311,70.4009907318559,64.7623472548703,74.6001889288069,80.1408439935287,79.9343387367881,82.3332477084016,76.2600094382683,76.7143742949698,76.3126390098708,75.0769923196813,69.4704758707023,75.564344042747,78.5630178591705,110.640548188575,109.773750990449,80.2287427709437,100.468383651542,104.251147991157,82.2407635…
ENSG00000054277,8.2961759496876,10.5315062584655,11.4795768364144,10.2386562020606,13.2539762502516,10.7589060762123,4.15660876729423,5.16809329640247,15.6671303924105,15.7692239801324,21.9668766958023,21.9289404866276,5.40350363175483,6.66558609195563,17.5562110788744,16.1594481380613,5.38553392964486,6.34704578917508,4.59617457895745,7.72516045235254,7.65428676569357,8.91732054557605,6.53028395…
ENSG00000054282,12.7527993937347,11.5794173289596,6.31517063127933,6.29514550939413,10.213020660367,11.6990046653959,8.53198641707762,8.35390423254098,9.7697525122741,7.74574406851904,8.73682595855774,10.0415350376476,5.15070814021074,4.91004078378624,9.5324739842326,9.11643000864152,15.7043813826285,12.7662170986817,14.2160748604963,16.7079051643904,14.2520002048343,12.8965549825804,16.257686093…
ENSG00000054356,15.7695906481665,17.7096970913499,11.5637791114982,10.6004461738648,11.6474336744635,11.3856384690014,10.9384441244585,10.9025529814518,6.25264160785542,6.75823884862816,3.36991858401513,4.87309788591723,11.0598027550537,8.86001772716736,9.08671081230806,8.58984921391854,21.172137204329,31.6270406653781,31.0330857230383,15.7069707536205,30.0536412886128,23.4439233698209,18.1623522…
ENSG00000054392,0.479944063205068,0.838328856395262,0.617483350613979,0.578863954886817,0.344259123383158,0.208910797596356,0.984459971201264,0.707957985808557,0.532895591578587,0.555471686188616,0.624058997039839,0.443008898719749,0.252795491544086,0.301734349841613,0.274315798107413,0.296201697031674,0.411109460278234,0.396690361823443,0.213775561811974,0.256649848915367,0.258273479824016,0.143…
ENSG00000054523,295.576979496721,303.632232675659,287.719173961086,302.999101386068,312.702037073036,312.635008602947,226.972715582514,221.73244115524,290.214939173698,277.365528636849,375.808328017391,334.619388166317,295.549529051479,269.39391361768,280.59077198912,287.085267023032,242.225693995935,264.98916169806,220.545121269354,256.264874141994,240.241295050849,254.934688177961,253.898800597…
ENSG00000054598,0.411380625604344,0.838328856395262,0.785887900781428,0.397968968984686,0.229506082255439,0.208910797596356,0,0.212387395742567,0.142105491087623,0.123438152486359,1.87217699111952,1.6982007784257,0.126397745772043,0.109721581760586,0.20573684858056,0.131645198680744,0.328887568222587,0.216376560994605,0.178146301509979,0.23098486402383,0.258273479824016,0.575311002940391,0.612214…
ENSG00000054611,15.5639003353643,15.6662705038865,16.194904241103,16.4614437170938,18.3031100598713,17.7574177956903,9.73521527076806,10.3361865928049,17.1592380488305,17.6207962674278,16.5999693212597,14.9146329235649,12.9873683780774,12.5905515070273,14.3672899258758,16.0278029393806,14.429942055766,15.5430496314458,14.8217722856302,13.4997820529483,13.5476179871325,15.0299999518177,14.62511510…
ENSG00000054654,172.162791815418,200.989343320764,200.934695774794,210.453226598538,251.07965398745,241.605337420186,127.87041181492,130.547452583098,189.497672365346,180.775174316273,428.478907367553,245.86993878946,277.158657041647,205.75539619654,155.297031203559,185.290617143147,177.147066433891,301.340423945153,203.371817803792,217.79306178958,203.237749214244,240.911482481289,226.7232960193…
ENSG00000054690,30.9906737955272,28.0840166892413,35.2526858350526,32.8143504426464,37.4094914076365,40.0064177397022,26.9085725461679,29.0262774181509,32.43557834075,33.2665820950738,39.5653404123258,35.5145467140332,32.9582122100602,32.3130058284927,32.3692641766747,34.4252194550145,24.0910143723045,26.4700659616734,25.9024722395509,31.850246250397,25.451677466294,28.6456936880736,24.9307194692…
ENSG00000054793,21.8031731570302,19.648332571764,24.6431991745033,27.6045748486651,22.4342195404692,23.50246472959,19.9079683065145,20.3891899912865,23.3408269111421,24.4098946541775,23.9638654863298,20.2307397082019,26.9227198494451,23.6998616602867,25.71710607257,23.9923374595656,20.6788058519952,17.4904386803973,15.7481330534821,18.2991342276657,16.0833939708592,18.1222965926223,19.45480427888…
ENSG00000054796,0,0,0,0,0,0,0,0,0,0,0,0,0,0,0.0685789495268533,0,0,0,0,0,0,0,0,0,0,0,0,0,0.0997852787110935,0,0.036217748638104,0,0,0.0337019960984547,0,0.0343258480672745,0,0,0,0,0,0,0,0,0,0
ENSG00000054803,0.137126875201448,0.26197776762352,0.561348500558163,0.687400946428095,0,0,0,0.283183194323423,0,0,0,0,0,0,0.171447373817133,0.098733899010558,0,0,0,0,0,0,0,0,0,0,0,0,0,0.0919823436825223,0.036217748638104,0,0,0,0,0,0,0,0,0.0414970096009971,0,0,0,0,0.16275264635803,0
ENSG00000054938,0.068563437600724,0.157186660574112,0.0280674250279081,0.253252980262982,0.229506082255439,0.313366196394534,0.21876888248917,0.424774791485134,0.213158236631435,0.0925786143647694,0,0.0738348164532914,0.379193237316128,0.137151977200733,0.10286842429028,0.098733899010558,0,0,0.106887780905987,0.128324924457683,0.18783525805383,0.0719138753675488,0.170059477962298,0,0.249033942859…
ENSG00000054965,57.867541335011,56.1680333784826,57.4259516071001,62.1916961531523,61.2207474416383,59.1217557197687,41.6754721141869,41.5571337669623,53.6092965128059,60.9475877901398,53.2946383472022,50.7245189034112,45.3135918592773,42.5994041185477,46.8737120016042,47.4910054240784,48.2642506366647,40.5345424263227,40.2966934015572,50.5856852212188,42.3568506911387,41.1107654184487,54.6231043…
ENSG00000054967,3.83955250564054,5.50153312009391,10.2726775602144,9.47889726127162,5.16388685074738,4.80494834471619,7.87567976961011,7.22117145524729,4.93816581529491,5.7398740906157,4.99247197631871,4.72542825301065,10.4910128990796,9.62806879949146,5.07484226498714,5.59492094393162,5.91997622800657,6.52735959000392,8.08784208855304,5.36398184233117,6.22204292303312,7.50301433001426,6.46226016…
ENSG00000054983,12.5471090809325,13.8848216840465,14.1459822140657,14.5801358637117,12.4507049623576,12.325737058185,10.1727530357464,10.8317571828709,14.8500238186566,13.3004609304052,16.2255339230358,17.4250166829768,11.6285926110279,13.0842986249499,15.0187899463809,15.1062865486154,15.8688251667398,12.9465308995105,13.2540848323424,15.7583007234035,13.5476179871325,14.1190908638288,12.4823656…
ENSG00000055044,147.548517716758,134.55178145144,186.872915835812,185.525897541225,137.531519791572,140.388055984751,201.376756331281,200.706088976726,161.680522484943,159.914126546078,135.295990558237,133.493348147551,198.381261989221,205.069636310536,120.938977490606,124.042688456931,145.738303668634,166.646014726012,170.735415367164,155.350153548472,168.347350030745,162.52535833066,145.2988179…
ENSG00000055070,98.5942232698411,99.446760589888,114.964172914312,99.0942732771869,101.958077041979,113.020741499629,115.509969954282,112.777707139303,99.6514756251958,101.12670642445,105.465970499733,96.7974443702651,117.265508640013,118.389586719673,90.9356870726074,86.2605164355575,108.204009945231,102.41823887078,88.5030825901574,96.551673161961,89.7148151279605,90.7313394220574,106.389209413…
ENSG00000055118,10.4902059529108,9.90275961616904,7.40980020736775,7.19962043890478,9.00811372852598,6.99851171947792,5.57860650347383,5.73445968504932,7.03422180883735,6.9433960773577,9.36088495559758,8.78634315794168,5.24550644953978,5.6506614606702,9.66963188328631,10.794906291821,9.86662704667761,11.0712673708906,10.2968562272768,8.90574975736323,10.3544186002174,9.39674638135971,8.3669263157…
ENSG00000055130,122.591426430094,109.297124652532,136.379618210606,132.017160711375,131.105349488419,120.228164016703,136.839935996976,136.777482858213,141.217331768326,126.863561217856,141.286956929819,133.050339248831,152.18288590954,158.93171118021,117.544319489026,116.143976536086,99.6118222254161,79.734762726512,76.2109877859689,95.3967488418419,87.3903538095444,90.3477987534305,102.78394848…
ENSG00000055147,15.7695906481665,15.1947105221641,16.7843201666891,16.7870546917177,19.3932639505846,18.5930609860757,13.7824395968177,13.4512017303626,19.5750313973201,20.1204188552765,17.3488401177075,18.4587041133229,10.3962145897505,10.8075758034178,19.8878953627874,18.3645052159638,14.0599435415156,12.874405379179,12.8977922293225,14.1670716601283,13.1015092492546,13.8074640705694,16.5978050…
ENSG00000055163,85.9099873137071,87.9197388144532,80.2728355798173,73.5519012678061,100.122028383935,93.5920373231674,79.7412576673024,77.8045826403605,87.7856671193792,83.9070841526026,87.6178831843933,83.359507775766,70.909135378116,70.8527114218987,87.7124764448453,84.2858384553463,87.1963165250134,81.4297124543031,70.3677890964416,84.5404602327219,72.5278890160351,72.7528705801702,77.24101489…
ENSG00000055208,131.436109880588,137.276350234724,144.996317694173,153.543664033728,171.211537362557,156.787553596065,142.41854250045,138.688969419896,158.163411580525,157.568801648837,167.871870203717,167.309694083158,153.13086900283,161.674750724224,159.857531347095,153.498301661747,164.238229381154,185.470775532542,170.521639805352,166.334767082049,179.617465513975,184.051578357347,162.7469204…
ENSG00000055211,17.9636206513897,16.6617860208558,19.8998043447869,18.342751570476,25.1309160069706,23.50246472959,22.2050415726507,19.6812320054779,28.5276773358404,23.3606703580435,21.3428176987625,22.8887931005203,25.4691457730666,25.2908245958152,21.7395270000125,22.5113289744072,24.2554581564158,27.0831328844914,25.6174381571349,22.5338567347692,27.353509454089,29.7963156939544,22.8900057337…
ENSG00000055332,147.068573653553,148.122229814338,145.276991944453,152.639189104217,161.514905387265,160.234581756405,140.230853675558,140.67125178016,159.442361000313,147.848047140537,183.098909731489,167.826537798331,177.241239008847,181.56178741833,163.11503144962,164.227385354228,119.632852940966,121.964254880626,119.215504970478,131.841027387824,130.169833831304,129.229234035485,126.28616833…
ENSG00000055483,65.7523366590943,59.7833265716872,70.0843602946866,67.510008738675,61.9666422089685,64.4489810584758,102.930759211154,99.2557096103598,74.7119619393179,71.0695162940213,62.6555233027998,63.4241073333773,104.910128990796,106.018478376167,51.2284752965594,56.6403467323901,65.407515130267,80.4560179298273,76.0684707447609,53.5884884535286,75.6036913666666,71.4584208235543,60.67722173…
ENSG00000055609,149.468293969578,154.042927362629,148.841554922997,163.92703622451,217.342259895901,212.044459560301,131.151945052257,131.255410568907,168.359480566062,159.543812088619,272.339346308186,191.084504981118,200.372026485131,163.594878405034,143.021399238252,162.186884774677,177.188177379919,200.256507200507,153.954033764924,199.904567320179,158.157287281325,176.764305653435,215.295299…
ENSG00000055732,2.46828375362606,2.7245687832846,8.30795780826081,11.0345941400299,3.04095558988457,4.07376055312894,12.5792107431273,14.6547303062371,2.4513197212615,2.06758905414652,2.37142418875139,1.84587041133229,20.2236393235268,17.7200354543347,3.42894747634266,3.91644466075213,3.61776325044846,13.2710957410024,19.5960931660977,4.54270232580199,14.0406855395238,15.725167413704,4.1494512622…
ENSG00000055813,0.137126875201448,0.523955535247039,0.112269700111633,0.217073983082556,0.114753041127719,0.208910797596356,0,0.283183194323423,0,0,0.249623598815935,0.147669632906583,0.252795491544086,0.384025536162053,0.274315798107413,0,0.534442298361704,0.252439321160373,0.49880964422794,0.0513299697830734,0.117397036283644,0.359569376837744,0.238083269147218,0.612732708223424,0.3424216714317…
ENSG00000055917,209.187048119809,216.341240503502,190.12873713905,187.805174363592,229.563458776003,219.147426678577,208.596129453423,198.653010817881,209.747704845332,210.986662137309,251.121340408831,239.077135675758,199.360844518955,203.368951793247,224.25316495281,217.082932624547,215.1335805636,142.37577713445,135.284301366678,209.092631911349,154.635376192816,166.912104728081,226.9273673928…
ENSG00000055950,27.4939384778903,26.9837100652225,25.0361431248941,22.1415462744207,31.499709789559,31.7544412346461,25.1584214862545,22.9378387401973,30.3750487199795,32.7111104088852,23.5894300881059,30.4199443787561,21.6772133999053,25.5102677593364,25.477079749226,23.893603560555,25.7354522134174,22.5031623434389,23.5865703199212,25.4853299972959,27.4239476758592,23.7795214548695,26.461254770…
ENSG00000055955,0.548507500805792,0.0523955535247039,0.898157600893061,1.04919091823235,0.229506082255439,0,0.328153323733755,0.0707957985808557,0,0.246876304972718,0.499247197631871,0.221504449359874,0.126397745772043,0.384025536162053,0.171447373817133,0.197467798021116,0.164443784111294,0.865506243978421,0.890731507549894,0.38497477337305,0.657423403188405,0.311626793259378,0.204071373554758,0…
ENSG00000055957,0,0.0523955535247039,0,0,0.0573765205638597,0,0,0,0,0,0,0,0.0631988728860214,0,0,0,0,0,0,0,0,0,0,0,0.0311292428574341,0,0,0,0.0332617595703645,0,0,0,0,0.0337019960984547,0,0,0,0,0,0,0,0,0,0,0,0
ENSG00000056050,27.6996287906925,28.9223455456366,28.4884364033268,27.3875008655825,35.0570540645183,34.1569154070042,23.2988859850966,21.592718567161,27.9592553714899,26.8477981657831,37.5683516217983,36.474399327926,29.1346804004559,31.6546763379292,35.0095537334586,33.8657273606214,42.590940084825,40.5345424263227,40.0116593191412,43.7844642249616,39.4923630058178,39.576602743941,46.4942612748…
ENSG00000056097,165.992082431353,165.41276247749,165.429403114491,161.937191379587,191.006436957089,181.75239390883,138.699471498134,133.450080324913,200.155584196917,198.365111045579,206.064280822555,200.166187404873,125.102168877879,129.224592918531,175.082058142056,174.331154352975,176.530402243474,118.466167144546,109.346199866825,168.028656084891,133.78566254884,139.704688547358,178.97059460…
ENSG00000056277,19.88339690421,21.5345724986533,18.4122308183077,19.4281214858888,39.6471757096271,33.2168168178206,30.8464124309729,27.2563824536295,25.6145147685441,25.2431021834604,49.9247197631871,43.2672024416288,24.5211626797763,26.8269267404634,35.1467116325123,37.7163494220331,53.9375611885043,27.3355722056518,27.6483059943487,50.9193300248088,31.9554732764078,33.6556936720128,51.97017646…
ENSG00000056291,1.37126875201448,2.20061324803756,4.65919255463275,2.67724579135153,1.89342517860737,2.08910797596356,3.71907100231589,2.54864874891081,2.30921423017388,1.48125782983631,1.37292979348764,2.65805339231849,0.726787038189246,0.685759886003665,0.994394768139372,1.48100848515837,0.904440812612115,0.216376560994605,0.49880964422794,0.641624622288417,0.680902810445134,0.647224878307939,0…
ENSG00000056487,11.7929112673245,10.5315062584655,10.8059586357446,11.975248066721,11.0162919482611,15.877220617323,7.65691088712094,8.77867902402611,14.2105491087623,12.8375678585814,10.8586265484932,13.1425973286859,8.21585347518278,8.20168823660384,12.2756319653067,12.9999633697235,7.93441258336991,9.23206660243649,7.19711058100314,11.0102785184692,9.53263934623187,8.89334925378687,7.482617030…
ENSG00000056558,1.91977625282027,2.35779990861168,1.96471975195357,1.62805487311917,1.77867213747965,1.8801971783672,1.31261329493502,1.91148656168311,2.27368785740197,2.62306074033513,2.62104778756732,2.36271412650533,0.947983093290321,1.81040609904968,3.01747377918154,3.19239606800804,3.41220852030934,2.41620493110642,2.85034082415966,3.54176791503206,2.65317302001035,2.58889951323176,1.8706542…
ENSG00000056586,101.679577961874,102.904867122518,136.042809110271,138.529380203851,109.474401235844,118.66133303473,140.668391440536,136.352708066728,109.883070983505,108.965029107334,136.044861354685,118.431045591079,166.687027236881,154.734860677867,115.486951003221,118.118654516298,118.070636991909,123.11826320593,117.077749352358,112.489628779605,112.25504609442,119.784545070547,125.87802558…
ENSG00000056736,5.75932875846081,5.13476424542098,6.14676608111188,7.38051542480691,5.45076945356667,4.70049294591801,3.71907100231589,5.09729749782161,5.82632513459255,4.2277567226578,3.869165781647,6.12828976562319,4.4239211020215,4.60830643394463,4.90339489117001,6.61517123370739,4.35776027894928,6.74373615099853,5.34438904529936,5.18432694809041,5.23590781825051,5.94488036371737,5.03376054768…
ENSG00000056972,17.2094228377817,14.0944038981453,13.8933753888145,14.182166894727,14.5162597026565,11.9079154629923,16.079512862954,16.9201958608245,12.7184414523423,13.5164776972563,15.8510985248119,14.9146329235649,19.4968522853376,18.4606561312187,14.470158350166,13.8227458614781,10.4421802910671,14.5332923468043,13.0046800102284,11.2155983976015,13.2658651000517,14.3348324899314,11.223925545…
ENSG00000056998,116.900661109234,110.764200151224,147.353981396518,133.428141601411,116.703842826891,121.899450397474,107.415521302182,105.202556691152,119.510718004691,114.242010126125,123.563681413888,113.631782521616,106.74289630449,107.225415775533,126.493872402281,124.371801453633,96.1585027590789,106.385142489014,98.8711973380382,98.5278769986094,98.4021958129502,95.8851671567318,98.7705448…
ENSG00000057019,203.564846236549,180.921846320803,219.936342518688,222.066684693455,182.39995887251,173.70932820137,147.997149003923,144.918999695012,157.808147852806,159.420373936133,233.897312090531,208.214182398282,159.95634727452,152.430707460895,190.512321785598,188.713392308846,158.770473559454,121.6757527993,114.405554829708,155.32448856358,128.127125399969,140.064257924196,161.35243269062…
ENSG00000057149,0.205690312802172,0.314373321148223,14.1740496390936,13.7841979257423,0.688518246766317,0.104455398798178,1.4219977361796,1.69909916594054,0.177631863859529,0.648050300553386,0.249623598815935,0.443008898719749,4.23432448336343,3.86768575706067,1.37157899053707,1.34936328647763,0,0.685192443149583,0.534438904529936,0.179654894240757,0.586985181418219,0.671196170097122,0.1360475823…
ENSG00000057252,13.4384337697419,8.43568411747733,21.2751081711544,18.849257531002,10.9015389071333,9.19207509423966,20.3455060714928,21.3803311714184,5.86185150736446,4.90666656133278,7.98795516210993,9.15551724020814,47.7467484653892,46.576811457369,10.8354740252428,11.3543983862142,7.35885933898039,10.4942632082383,11.4726218172426,9.54737437965165,10.0491863058799,10.3795693447162,8.230878733…
ENSG00000057294,68.9062547887276,64.760904156534,45.4692285452112,46.200579399404,56.458496234838,56.6148261486125,46.2696186464594,47.9995514378202,55.7764052518921,52.4920743448242,55.7908743353616,50.2076751882382,62.6300830300472,65.3117715429891,57.7777649763739,58.9770490089733,55.3353333534503,40.2099775848308,35.9499236447137,46.5049526234645,40.2202246307763,40.3436840811949,51.528021822…
ENSG00000057468,0.137126875201448,0.209582214098816,0.0842022750837244,0.253252980262982,0.114753041127719,0.208910797596356,0.328153323733755,0.141591597161711,0.0355263727719058,0.154297690607949,0.124811799407968,0.147669632906583,0.252795491544086,0.219443163521173,0.240026323343986,0.296201697031674,0.411109460278234,0.14425104066307,0.178146301509979,0.30797981869844,0.117397036283644,0.167…
ENSG00000057593,0.34281718800362,0.26197776762352,0.505213650502347,0.217073983082556,0.286882602819299,0.52227699399089,0.328153323733755,0.637162187227702,0.603948337122399,0.123438152486359,0,0.369174082266457,0.410792673759139,0.685759886003665,0.617210545741679,0.65822599340372,0.24666567616694,0.973694524475723,0.783843726643907,0.538964682722271,0.633943995931676,0.599282294729574,0.442154…
ENSG00000057608,460.677737239264,447.981982636218,520.538464567584,484.219698262822,516.503438115865,513.502740491843,459.852190992235,456.916084040843,534.529804726095,518.131645061493,510.605071377996,503.110439312728,493.204004002511,503.649490676532,477.755251878823,460.955663180625,499.991325590388,491.46329553908,433.429951573778,486.83909840756,475.105805839906,476.812964978638,495.9954734…
ENSG00000057657,1.30270531441376,1.72905326631523,6.76424943172586,7.38051542480691,3.8442268777786,3.44702816033987,1.4219977361796,1.48671177019797,1.03026481038527,0.308595381215898,0.249623598815935,0.738348164532914,4.10792673759139,2.71560914857452,0.994394768139372,0.98733899010558,1.02777365069558,4.36359398005787,3.49166750959558,1.87354389708218,3.14624057240165,3.37995214227479,2.17676…
ENSG00000057663,55.399257581385,54.2293978980685,49.9319491246486,49.9993741033488,49.8601963699941,50.6608684171163,46.9259252939269,46.4420438690414,50.909292182141,47.3693910166403,54.4179445418739,52.201215232477,47.241157482301,52.9680935949231,56.7147912587076,55.4226286445932,51.5531263188905,45.1145129673752,41.2586834297111,49.7387407197981,49.9641786423188,48.7336362074089,53.5687355581…
ENSG00000057704,10.9015865785151,9.06443075977377,3.98557435396296,3.50936272650133,7.22944159104633,9.19207509423966,2.95337991360379,4.38933951201306,5.68421964350493,5.7398740906157,6.36540176980635,6.71896829724952,2.71755153409892,2.55102677593364,10.526868752372,9.08351870897133,9.70218326256632,6.67161063066699,5.95008647043329,10.2146639868316,6.48031640285713,6.16062198982002,11.49602071…
ENSG00000057757,42.9892753756539,41.7068606056643,49.3986680491183,46.8879803458321,44.2946738752997,40.4242393348949,45.7226964402365,45.3801068903285,50.9448185549129,42.8947579890098,48.1773545714755,44.3008898719749,51.1278881647913,51.4594218457151,35.9353695520711,35.3796471454499,39.4253972406826,52.7958808826837,46.4249261735005,38.7284622013289,46.5127057755796,46.5522486545933,41.120381…
ENSG00000057935,261.706641321963,255.480718986456,271.776876545235,258.426576859783,201.104704576328,194.9137741574,175.233874873825,182.369977144284,146.048918465305,145.96561531512,215.674789376968,207.180494967936,228.90631759317,230.963929606035,255.182271189421,269.115697403111,178.750393328976,266.972613507177,254.642323378364,211.787455324961,261.372761581904,255.414114013744,184.140402737…
ENSG00000058056,69.5233257271341,72.5154460781902,97.0852231715343,96.7064594632788,68.7944481560678,66.4336336356412,71.8655778976923,72.7072851425389,71.656693880934,65.977692503959,104.717099703285,93.8440517121334,82.790523480688,75.9821953692061,76.8427129448391,78.6250949120743,64.4208524255993,70.5026961240755,60.9616643767147,69.2184642524745,65.6484226898136,72.5611002458568,65.574934702…
ENSG00000058063,63.1469260302668,59.6785354646377,55.1524901798395,56.6924885817276,78.8353392547433,69.7762063971829,52.9420695623791,50.6189959853119,63.2724699067642,62.9225982299216,72.2660318572133,79.8892714024613,65.2528362548171,59.9628444321605,65.7672125962523,68.3238581153061,64.1741867494323,56.5824707000892,55.7954216329253,68.4998446755114,61.8212793069668,64.8902868733182,64.214458…
ENSG00000058085,30.5792931699229,30.07504772318,24.1660529490289,20.3687754125799,27.2538472678334,30.1876102526734,27.8930325173692,27.468769849372,28.3855718447527,24.6567709591502,32.8255032442955,29.0170828661435,23.604779022929,21.2036956752333,35.763922178254,36.3669861355555,23.967681534221,18.5001959650387,15.5699867519721,20.1213481549648,16.9051732248447,17.8586123829413,22.583898673393…
ENSG00000058091,46.0746300676865,46.6320426369865,31.2390440560618,30.7883266005426,31.7865923923783,31.127708841857,31.612103519685,29.2386648138934,31.7961036308557,29.5942970586046,54.168320943058,47.4757869794664,37.1609372569806,31.243220406327,30.8262378123205,28.8632098107531,27.5854447846695,25.0636183152084,20.5580831942515,23.5091261606476,23.4089690349586,28.5737798127061,28.3319090285…
ENSG00000058262,219.540127197518,202.351627712406,183.897768782854,178.651888076944,212.178373045153,221.549900850935,235.067164234613,219.820954593557,218.131928819502,218.146074981518,224.910862533158,217.517369271397,239.018137254933,239.933668914962,187.151953258783,174.956469046709,267.591147695102,195.856850460283,188.300640696048,194.155610704475,185.956905473292,191.57856397915,242.606851…
ENSG00000058272,173.534060567432,180.135913017932,194.479188018376,200.829613348545,178.670485035859,166.81527188069,165.279890720568,162.97192833313,179.408182498124,177.010310665439,187.217699111952,181.70748329155,173.638903254344,174.04585906773,178.511005618399,178.346332912738,168.842655336271,168.557341014797,156.198677163949,172.8536732445,165.835053454275,166.504592767665,175.39934557031…
ENSG00000058335,0.891324688809412,1.10030662401878,1.45950610145122,1.8089498590213,0.401635643947018,0,0.109384441244585,0.424774791485134,0.319737354947152,0.308595381215898,0.499247197631871,0.738348164532914,1.45357407637849,1.48124135376792,0.548631596214826,1.02025028977577,0.328887568222587,1.19007108547033,1.42517041207983,0.615959637396881,0.915696883012421,1.22253588124833,0.30610706033…
ENSG00000058404,0,0.157186660574112,0,0.108536991541278,0.114753041127719,0.104455398798178,0,0,0,0.123438152486359,0.124811799407968,0.221504449359874,0.0947983093290321,0.109721581760586,0.0685789495268533,0.263290397361488,0,0.216376560994605,0.0356292603019958,0.0769949546746101,0.0704382217701862,0.0719138753675488,0.0680237911849193,0.0471332852479557,0.0311292428574341,0,0.166179191088222,…
ENSG00000058453,23.3115687842462,22.477692462098,22.00486122188,20.1878804266777,16.753944004647,20.1598919680483,14.8762840092635,11.0441445786135,16.8750270666553,19.6266662453311,25.9608542768573,21.0429226891881,13.6193571069376,14.4283880015171,23.5911586372375,23.1037323684706,13.278835566987,16.1921793144296,15.5343574916701,15.5529808442712,14.4633148701449,13.6876076116235,12.24428241328…
ENSG00000058600,63.832560406274,69.895668401955,59.5029410591653,55.6071186663148,60.7617352771274,62.8821500765031,76.1315711062311,72.9904683368623,72.1185367269688,76.5007950034211,57.4134277276652,63.5717769662839,60.8921140256816,66.601000128676,59.9722913612332,62.465646774013,71.9030446026631,56.5824707000892,56.1160849756433,64.2651221684079,55.5287981621635,52.7847845197808,70.5406714587…
ENSG00000058668,71.1688482295515,83.8328856395262,93.492592767962,93.9568556775664,87.9008295038331,90.980652353213,73.6157289576057,82.2647179509544,41.1750660426388,42.8947579890098,79.8795516210993,67.8541963205748,104.499336317036,88.0789997583108,73.2080286199159,80.0731920975625,60.1864249847334,105.195071403544,87.5410925620036,71.9646176358689,86.8503274426396,83.6358370524593,61.93566187…
ENSG00000058673,175.659527133055,169.761593420041,167.534459991584,182.884830747054,137.244637188752,132.344990277291,160.576359747051,155.53836948214,128.925206789246,113.16192629187,129.055400587839,141.393673508053,154.552843642765,152.759872206177,137.19218852847,146.126170535626,143.107203122853,143.277346138594,158.657096124787,149.010902280262,161.820074813375,158.498181310078,139.72086709…
ENSG00000058729,54.3708060173741,50.7188958119134,51.2791855259882,53.9428847960152,62.597783935171,57.7638355353924,61.145902655723,63.8578103199319,70.9461664254959,69.0019272398748,57.7878631258891,61.5782369220451,65.6636289285762,64.8728852159468,52.1542911151719,53.612507162733,63.3519678288758,54.9957092527955,57.1493335244012,51.8945994506872,57.3836713354451,57.3633012515148,62.819971159…
ENSG00000058799,20.9804119058215,20.8534303028322,22.5662097224381,20.9476393674667,22.9506082255439,28.9341454670953,27.1273414286571,21.4511269699993,23.5539851477735,22.0337102188151,20.7187587017226,26.0636902080119,21.6456139634623,24.4953431280509,26.3000271435482,23.7948696615445,22.1587999089968,20.6639615749848,18.2421812746218,20.0443532002902,18.2434994384782,20.3516267290163,21.801625…
ENSG00000058804,177.030795885069,167.613375725528,160.236929484328,172.899427525256,171.268913883121,165.352896297516,176.108950403782,168.140021629532,194.329259062325,191.051400510762,182.225227135633,179.049429899232,165.138654851174,173.93613748597,170.761584321865,158.566641810956,169.335986688605,135.415664422457,129.512361197755,152.450010255728,141.956496274182,148.909664594404,174.515036…
ENSG00000058866,0.479944063205068,0.26197776762352,0.280674250279081,0.470326963345538,0.688518246766317,0.104455398798178,0,0,0.852632946525739,0.586331224310206,0,0.221504449359874,0.0631988728860214,0.0548607908802932,0.20573684858056,0.230379097691302,0.411109460278234,0.108188280497303,0.0712585206039915,0.282314833806904,0.164355850797101,0.119856458945915,0.170059477962298,0.47133285247955…
ENSG00000059122,11.2444037665187,13.098888381176,7.46593505742357,7.27197843326563,17.7293448542327,17.8618731944884,7.54752644587636,7.85833364247499,15.2052875463757,17.5899367293062,11.3578737461251,10.2630394870075,8.81624276759998,8.44856179556516,12.4813688138873,13.1316085684042,14.2243873256269,14.6775433874674,14.1091870795903,13.6537719622975,11.9979771081884,11.7699042684888,13.1966154…
ENSG00000059145,13.0270531441376,13.5180528093736,12.1531950370842,13.4585869511185,13.0244701679962,15.1460328257358,21.1111971602049,22.088289157227,20.3210852255301,20.9536263845595,15.7262867254039,20.8214182398282,15.5153232935183,13.6877673246332,16.2532110378642,16.6531176331141,20.9254715281621,8.4386858787896,13.2540848323424,19.4283935628933,11.5518683703105,13.3040669429965,17.85624518…
ENSG00000059377,0.274253750402896,0.209582214098816,0.505213650502347,0.615042952067243,0.516388685074737,0.313366196394534,0.328153323733755,0.49557059006599,0.568421964350493,0.216016766851129,0.374435398223903,0.147669632906583,0.221196055101075,0.521177513362786,0.274315798107413,0.460758195382604,0.205554730139117,0.468815882154978,0.391921863321953,0.538964682722271,0.352191108850931,0.2397…
ENSG00000059378,5.69076532086009,5.50153312009391,5.92222668088862,4.70326963345538,5.27863989187509,6.1628685290925,6.01614426845217,5.73445968504932,5.79079876182065,6.01760993371001,6.98946076684619,6.12828976562319,5.909094614843,4.27914168866287,8.43521079180295,6.45061473535645,3.41220852030934,4.03902913856596,3.88358937291754,3.2851180661167,4.17933449169772,3.21215309975051,3.87735609754…
ENSG00000059573,126.499542373336,127.530777279129,142.442182016634,130.280568846714,151.588767329717,155.011811816496,148.325302327657,138.19339882983,157.097620397367,156.210981971488,146.029805307322,148.334146254662,164.190671757884,159.425458298132,142.232741318694,140.926185187736,155.4404869312,153.519170025672,131.75700459678,134.484520831652,140.547731838778,135.941195736456,148.461924261…
ENSG00000059588,31.4706178587323,32.3280565247423,22.313602897187,20.5858493956624,28.4013776791106,31.3366196394534,38.8314766418276,36.318244671979,30.5882069566109,30.4275045878875,39.5653404123258,37.3604171253655,31.6942347523397,30.310586961362,34.0837379148461,40.349253395648,35.6843011521507,21.2409657376371,24.2635262656591,38.9594470653527,24.7238158413354,27.0635884299875,33.7738123233…
ENSG00000059691,16.8666056497781,15.7710616109359,19.254253569145,17.3297396494241,18.5899926626906,21.0999905572319,15.3138217742419,17.6281538466331,21.884245627494,20.1204188552765,20.7187587017226,21.4120967714545,13.8089537255957,16.5130980549683,17.7962374022184,17.6075453235495,16.3210455730459,14.7857316679647,12.2564655438865,13.1661372493583,13.3832621363354,13.9752631130937,14.76116268…
ENSG00000059728,2.26259344082389,2.82935989033401,8.47636235842826,7.88702138533287,5.10651033018352,4.38712674952347,5.90675982720759,5.52207228930675,3.87237463213773,4.99924517569755,3.12029498519919,4.2824193542909,6.73067996236128,6.83016846459651,3.94328959779406,3.55442036438009,3.65887419647628,6.02248094768318,7.01896427949316,4.46570737112738,6.64467225365424,6.42430619950103,3.36717766…
ENSG00000059758,35.7215509899772,34.1619008981069,68.0915731177052,64.9051209416843,43.2618965051502,39.2752299481149,44.0819298215677,43.8933951201306,31.6184717669962,33.2665820950738,41.4375174034453,43.9317157897084,58.8065512204429,55.8482851161385,46.1879225063357,44.23278675673,38.7265111582096,39.1280947798578,41.3299419503151,38.3178224430643,39.7975953001552,41.4463635034973,41.22241745…
ENSG00000059769,6.8563437600724,7.07339972583503,7.99921613295382,7.7784843937916,8.66385460514282,8.14752110625788,11.3759818894368,10.6901655857092,8.91711956574836,8.42465390719401,9.73532035382148,8.93401279084826,11.912987539015,11.1641709441397,9.63534240852288,8.78731701193966,8.87996434200985,12.5498405376871,11.3657340363366,9.57303936454319,11.9275388864182,11.5062200588078,8.4349501069…
ENSG00000059804,501.130165423692,510.699460205289,636.428862507817,627.054379131144,481.618513613038,474.227510543728,522.638860266627,546.401973447045,407.061179220497,394.292318579553,284.32127905135,285.223895959065,730.357774507306,717.990600645838,429.269934563338,425.312725637814,317.49983617288,621.39742041634,579.830582154679,367.214603828107,579.683085761376,523.173443298918,313.92979631…
ENSG00000059915,4.31949656884561,4.34883094255042,3.17161902815362,1.44715988721704,1.66391909635193,1.98465257716538,2.73461103111462,3.39819833188108,2.13158236631435,3.27111104088852,2.12180058993545,2.43654894295862,1.70636956792258,2.52359638049349,2.64028955678385,4.60758195382604,2.71332243783634,2.19982837011182,3.74107233170955,2.97713824741826,3.24015820142857,2.32521530355075,2.2447851…
ENSG00000060069,47.2402085068988,43.7502871931278,40.4170920401877,36.2513551747869,30.2374263371541,31.4410750382516,32.4871790496417,30.0174185982828,35.4908463991339,37.0314457459077,41.4375174034453,42.8980283593623,39.7836904817505,38.3202624298848,37.4098169668985,35.5771149434711,21.172137204329,22.1425347417813,16.567606040428,17.6061796355942,18.9244022489234,21.4543061513187,19.31875669…
ENSG00000060138,212.752346875046,210.472938508736,188.444691637375,182.776293755512,222.276640664393,222.072177844926,218.76888248917,207.290098244746,237.920118453453,251.5669547672,233.3980648929,230.586131783629,202.868381964129,197.197112819214,217.669585798232,216.161416233782,210.488043662456,165.564131921039,161.614324729853,182.529372548609,178.795686259989,176.812248237013,200.4661126219…
ENSG00000060140,0.959888126410136,1.93863548041404,1.51564095150704,1.19390690695406,2.58194342537369,2.92475116634898,2.07830438364711,1.13273277729369,2.41579334848959,2.59220120221354,1.24811799407968,3.10106229103824,2.33835829678279,2.4138747987329,2.60600008202042,2.76454917229562,1.68554878714076,0.829443483812653,0.997619288455881,2.10452876110601,1.22092917734989,1.55813396629689,2.10873…
ENSG00000060237,363.523346159039,364.253888103742,318.958218017148,330.060991277027,391.479999807215,393.170121076342,308.682893192219,314.262549900419,387.628253314264,377.720746608259,512.102812970892,408.232700170248,358.084813772197,312.048178527108,337.477010621645,357.087601421518,371.51961925344,340.973397367332,283.929575346604,371.013021592054,305.161856115704,328.59846784612,400.8982133…
ENSG00000060303,0,0,0,0,0,0,0,0,0,0,0,0,0,0,0,0,0,0,0,0,0,0,0,0,0,0,0,0,0,0,0,0,0,0,0,0,0,0,0,0,0,0,0,0,0,0
ENSG00000060339,162.769600864119,156.453122824766,163.605020487677,184.910854589157,181.309804981797,187.184074646335,192.626001031714,201.484842761115,239.447752482645,224.348842143958,197.826702061629,201.347544468126,165.170254287617,175.115644489896,149.467820493777,159.718537299413,215.791355700045,113.669820042499,124.096713631851,202.445400824441,133.269115589192,143.995549777622,219.34271…
ENSG00000060491,36.4071853659844,34.0047142375328,27.814818202657,26.1212359642676,21.8030778142667,22.4579107416083,24.1739615150533,27.468769849372,17.9408182498124,21.6942552994776,23.214994689882,23.6271412650533,22.6883953660817,20.4630749983494,24.9284481530112,23.8277809612147,29.1887716797546,35.053002881126,39.0852985512893,25.6649848915367,29.0205473693167,31.6181338699323,27.1074807871…
ENSG00000060558,0.205690312802172,0.314373321148223,0.617483350613979,0.434147966165112,0.172129561691579,0.104455398798178,0.21876888248917,0.141591597161711,0.603948337122399,0.802347991161334,0.124811799407968,0.0738348164532914,0.221196055101075,0.466316722482493,0.651500020505106,0.49366949505279,0.328887568222587,1.37038488629917,0.997619288455881,0.359309788481514,1.10353214106625,0.886937…
ENSG00000060566,0.617070938406516,0.890724409919966,0.140337125139541,0.397968968984686,0.688518246766317,0.731187791587246,0,0.0707957985808557,0.177631863859529,0.123438152486359,0,0.221504449359874,0,0.109721581760586,0.514342121451399,0.197467798021116,0.328887568222587,0.649129682983815,0.285034082415966,0.333644803589977,0.610464588674947,0.527368419362025,0.238083269147218,0.32993299673569…
ENSG00000060642,7.19916094807602,7.02100417231032,3.98557435396296,4.08822668138814,9.23761981078142,9.19207509423966,5.90675982720759,6.65480506660044,10.9065964409751,10.152788042003,12.3563681413888,11.4443965502602,4.10792673759139,4.93747117922639,11.5898424700382,12.8024955717024,9.12663001817679,6.09460646801471,6.91207649858718,8.26412513507482,7.8421220237474,7.74272724790609,8.502973898…
ENSG00000060656,72.8829341695696,65.651628566454,52.261545401965,44.7172405150066,48.9995485615362,51.2876008099054,42.4411632028989,42.6190707456752,32.6842629501533,36.3216763691112,51.9217085537146,46.8851084478401,69.8031551026106,61.3892249950481,59.5608176640721,54.9947817488808,38.3565126439592,52.0385629192025,42.149414937261,40.3453562494957,44.4699973442442,44.8263156457721,36.290692597…
ENSG00000060688,80.6991660560521,75.921157057296,95.4292450948877,94.4995406352728,74.1304645685068,82.3108542529642,74.4908044875623,72.9196725382814,87.501456137204,95.386832333834,96.479520942359,95.9852613892789,78.8721933617547,84.9519346781341,79.002949854935,77.8023124203197,78.8507944813653,75.0466039049622,66.804863066242,76.9949546746101,67.2919811977846,68.4380380581173,84.179441591337…
ENSG00000060709,1.09701500161158,0.995515516969374,0.392943950390714,0.18089498590213,0.459012164510878,0.417821595192712,0.109384441244585,0.283183194323423,0.177631863859529,0.185157228729539,0.249623598815935,0.221504449359874,0.315994364430107,0.301734349841613,0.171447373817133,0.131645198680744,0,0.28850208132614,0.213775561811974,0.436304743156124,0.211314665310559,0.167799042524281,0.2040…
ENSG00000060718,40.9323722476322,45.2697582453442,29.6111334044431,31.1501165723468,20.4834178412979,21.3089013548283,38.8314766418276,33.5572085273256,37.8355870020797,38.4509844995009,24.9623598815935,21.4859315879078,23.0991880398408,22.3832026791596,32.712158924309,36.0707844385239,13.97772164946,12.7301543385159,13.7885237368724,18.0168193938588,14.9094236080228,14.7902870339259,14.148948566…
ENSG00000060749,392.799934014548,377.771940913115,757.427531803129,820.901446023867,540.314694149867,524.052735770459,663.744789472141,708.382760600043,587.393047410691,557.261539399668,658.507053676438,583.295049981002,780.190085777934,688.941811874722,474.977804422986,506.768192321524,461.511480108345,540.184084523032,527.740603593161,508.269360791993,486.49331835942,560.6645436572,502.76384064…
ENSG00000060762,5.89645563366226,5.86830199476684,6.00642895597234,6.40368250093541,6.19666422089685,6.58069012428521,4.92229985600632,5.94684708079188,7.3539591637845,5.98675039558842,7.98795516210993,7.23581201242256,4.48711997490752,4.93747117922639,5.07484226498714,4.64049325349623,7.93441258336991,4.68815882154978,5.77194016892331,6.18526135886034,5.3063460400207,5.44148323614453,6.156153102…
ENSG00000060971,18.5806915897962,15.7710616109359,13.3600943132843,13.7841979257423,16.753944004647,12.6391032545795,14.1105929205515,15.0087092991414,19.9658214978111,16.8801673525096,17.9728991147473,18.1633648475097,14.630539073114,15.525603819123,14.7444741482735,14.0860362588396,17.9654834141588,14.6775433874674,15.4274697107642,14.4750514788267,14.2050413903209,16.252535833066,14.0809247752…
ENSG00000060982,474.801805385014,445.309809406458,520.791071392836,558.205747496793,520.634547596463,488.015623185087,398.706288336512,420.24386037596,554.815363578853,532.265313521181,668.866433027299,613.050481011679,443.308493858997,421.769760287694,479.641172990812,497.553028413872,332.012000120702,292.649298745203,274.238416544461,292.067528065688,355.36082883059,362.062391183819,340.1529678…
ENSG00000061273,43.7434731892619,47.9419314751041,53.7491189284441,54.7026437368042,45.9585929716516,47.6316618519691,57.7549849771408,55.6454976845526,47.6763922598976,49.7764349901243,39.3157168135098,38.6894438215247,45.9771800245806,48.8535342789011,39.6043433517578,42.0277296788275,46.784256579663,48.39622414246,49.8809644227941,40.3196912646041,47.0057733279709,44.6585166032478,43.399178775…
ENSG00000061337,13.918377832947,11.6318128824843,11.1708351611074,10.781341159767,14.1720005792734,15.250488224534,12.5792107431273,11.8228983630029,13.1802842983771,13.39303954477,12.1067445425729,12.5519187970595,7.42586756410751,8.14682744572355,17.5562110788744,16.9164080304756,20.5554730139117,22.6113506239362,17.9571471922059,15.5529808442712,19.3470315795445,17.2353587964225,18.46845930670…
ENSG00000061455,0.205690312802172,0.104791107049408,0.252606825251173,0.289431977443408,0.0573765205638597,0.313366196394534,0,0.212387395742567,0,0.154297690607949,0.374435398223903,0.147669632906583,0.47399154664516,0.219443163521173,0.137157899053707,0.296201697031674,0.411109460278234,0.072125520331535,0.285034082415966,0.0769949546746101,0.258273479824016,0.167799042524281,0.136047582369839,…
ENSG00000061492,0.068563437600724,0,0.0561348500558163,0.108536991541278,0,0.104455398798178,0,0,0,0,0,0,0.252795491544086,0.0822911863204399,0.0342894747634266,0.098733899010558,0.411109460278234,0.0360627601657675,0,0.179654894240757,0.0704382217701862,0.167799042524281,0.442154642701976,0.424199567231602,0.249033942859473,0.232229040380837,0.0332358382176444,0,0,0.0613215624550149,0.0362177486…
ENSG00000061656,1.02845156401086,1.46707549869171,0.813955325809336,0.434147966165112,0.688518246766317,0.626732392789068,0.546922206222925,0.353978992904279,0.603948337122399,0.308595381215898,0.374435398223903,0.664513348079623,0.379193237316128,0.219443163521173,0.685789495268533,1.02025028977577,0.24666567616694,0.57700416265228,1.03324854875788,0.359309788481514,0.868738068498964,0.599282294…
ENSG00000061676,459.30646848725,460.766497696246,332.598986580711,338.165086645442,412.881441977535,406.43595672371,377.266937852573,365.447912274377,374.625600879747,363.926533067908,475.033708546725,456.077661231981,459.70860137292,455.426855492754,423.955065975007,418.434264006745,401.818386475946,371.807057309063,335.592002784498,384.897778418376,370.035458366045,390.732056163682,404.84359323…
ENSG00000061794,57.1133435214031,50.0377536160922,49.0618589487834,45.4046414614347,55.8847310291994,52.9588871906762,57.6456005358962,55.9994766774569,60.6079919488713,58.4171056641695,60.2840991140484,56.8528086690344,54.5722267370795,57.6038304243079,50.474106851764,47.5897393230889,64.708629047794,46.8094626951662,43.4320683081328,46.9669223515121,48.3910583561179,47.1515309493228,61.01734069…
ENSG00000061918,7.06203407287457,7.12579527935973,6.28710320625142,6.9463674586418,5.16388685074738,3.96930515433076,2.73461103111462,1.98228236026396,4.79606032420728,3.88830180332031,8.4872023597418,9.96770022119434,1.45357407637849,1.78297570360953,6.24068440694365,6.74681643238813,6.3310856882848,3.35383669541638,3.09974564627363,6.98087589049798,3.33407583045548,4.33880381384211,6.3262125801…
ENSG00000061936,48.5429138213126,51.6620157753581,45.9183073456577,53.9790637931956,48.4831598764615,45.4380984772074,58.1925227421192,55.8578850802952,53.182980039543,49.8998731426107,53.7938855448341,48.5094744098125,49.0423253595526,48.1952047883376,47.5937909716362,51.9998534788939,46.7020346876074,41.2918603898038,46.1755213513865,48.3015015658721,46.1839940739854,49.2610046267709,47.0724634…
ENSG00000061938,24.0657665978541,26.2501723158767,17.429870942331,16.642338702996,23.8112560340018,24.0247417235809,15.8607439804648,17.2033790551479,20.4987170893897,24.3173160398128,21.5924412975784,28.5740739674238,15.1045306197591,16.3210852868872,23.385421788657,27.6125804232861,27.708777622753,21.6737188596263,23.4084240184112,26.2296145591505,22.070642821325,21.9337319871024,24.59060051334…
ENSG00000061987,51.3540147629423,58.0018777518472,52.9351636026348,53.1831258552263,63.4584317436289,61.4197744933286,49.4417674425524,43.3978245300646,54.4619294593316,52.4612148067026,53.5442619460182,59.289357611993,46.4195721347827,46.0830643394463,44.4048698186375,47.7542958214399,48.5520272588594,48.9371655449465,48.9902329152442,51.6636145866634,48.8136876867391,49.5966027118195,49.4532961…
ENSG00000062038,165.169321180144,164.574433621095,147.971464747132,140.95337301494,164.842743579969,166.188539487901,116.822583249217,114.618397902405,149.352871133092,150.255091114021,147.901982298442,153.42874858994,115.622337944976,120.666309541205,171.790268564767,168.999523806405,143.024981230798,176.310834450437,146.365001320599,132.61097693457,153.203132350155,146.224879914016,133.87082105…
ENSG00000062096,0,0,0,0,0.0573765205638597,0,0,0.141591597161711,0.0355263727719058,0.154297690607949,0.124811799407968,0,0.0631988728860214,0,0.0342894747634266,0.032911299670186,0.0411109460278234,0.072125520331535,0,0.0769949546746101,0.0704382217701862,0,0,0,0.0622584857148683,0,0,0.0876717043022785,0.133047038281458,0.0306607812275074,0,0.0390307067450096,0,0.134807984393819,0.03325882580314…
ENSG00000062194,198.422588416495,198.212378983955,179.098239103082,175.287241339164,180.277027611647,183.110314093206,166.701888456747,170.051508191216,184.16871644956,166.826663085314,193.45828908235,182.81500553835,163.021492609492,171.577123478117,198.981822052165,204.477904850866,176.530402243474,156.548441879597,155.236687135795,188.355324118988,161.984430664172,168.68598032048,172.882465296…
ENSG00000062282,4.04524281844271,3.56289763967987,8.86930630881897,8.7553173176631,4.53274512454492,5.11831454111072,5.14106873849549,4.38933951201306,3.09079443115581,3.39454919337488,4.2436011798709,4.79926306946394,7.55226530987956,8.86001772716736,9.3953160851789,9.6430108033645,4.35776027894928,7.32074031365081,6.19949129254726,4.56836731069353,6.87946632622152,6.8797607434955,4.455558322612…
ENSG00000062370,10.2845156401086,10.1123418302679,7.99921613295382,7.9232003825133,10.213020660367,8.56534270145059,9.73521527076806,8.35390423254098,12.6829150795704,12.559832015487,13.6044861354685,13.5856062274056,7.55226530987956,5.67809185611035,12.0013161671993,12.9341407703831,10.6066240751784,8.72718796011574,7.19711058100314,10.1889990019401,7.13773980604554,9.1330621716787,7.48261703034…
ENSG00000062485,193.280330596441,192.239285882139,179.12630652811,181.256775873934,198.121125507008,191.46674599706,178.734176993652,181.662019158476,175.60686061153,180.281421706328,184.596651324384,190.272322000132,205.459535752456,201.393963321556,174.224821272971,170.217241894202,183.313708338065,191.45719372006,177.362457783335,171.750078894164,176.142513239979,175.997224316181,183.630224303…
ENSG00000062524,0,0.209582214098816,0.140337125139541,0.108536991541278,0.229506082255439,0,0.109384441244585,0,0.177631863859529,0.0617190762431796,0,0.221504449359874,0.126397745772043,0.137151977200733,0.137157899053707,0.197467798021116,0.12333283808347,0.14425104066307,0.0712585206039915,0.15398990934922,0.164355850797101,0.0479425835783659,0.0680237911849193,0.188533140991823,0.186775457144…
ENSG00000062582,34.9673531763692,33.5331542558105,34.1019214089084,32.4525604708422,37.8111270515836,41.8866149180694,38.2845544356047,39.1500766152132,42.0276989891646,41.7838146166326,36.1954218283106,33.7425111191542,37.7929259858408,40.1306685289345,38.335632785511,35.5112923441307,33.2998662825369,30.400906819742,30.1067249551864,31.0033017489763,32.3311437925155,30.3716266968948,33.50171715…
ENSG00000062598,37.0928197419917,36.100536378521,26.1588401260104,25.2167610347569,29.8357906932071,31.5455304370497,34.4560989920442,31.6457219656425,30.3750487199795,30.4892236641307,31.078138052584,30.6414488281159,22.1512049465505,18.4606561312187,32.4378431262016,34.9518002497375,32.0665379017022,23.4407941077489,19.4892053851917,29.8740424137487,23.6672425147826,23.9952630809721,32.24327702…
ENSG00000062650,179.156262450692,181.969757391297,166.608234965663,164.795332156841,196.916218575167,200.136544097309,193.938614326649,188.6000074194,204.987170893896,209.073370773771,214.92591858052,198.172647360634,207.197504756821,204.877623542455,175.870716061615,174.298243053305,220.683558277356,174.904386803972,169.381503475688,209.297951790482,175.625966280331,181.942104679899,222.64186854…
ENSG00000062716,89.3381591937433,92.9497119528247,86.1108599856222,98.8410202969239,84.6303678316931,81.1618448661843,91.8829306454513,92.0345381551125,92.5462010708146,87.5485096509502,73.2645262524771,83.0641685099529,72.6155049460386,80.3984890350697,87.0952658991036,98.8326329095685,92.0062972102688,66.5357925058411,88.1467899871375,135.998754940253,93.9411084341717,89.1732054557605,85.846024…
ENSG00000062725,27.6310653530918,28.660367778013,25.2606825251173,23.6972431531791,33.1062523653471,32.276718228637,27.67426363488,28.7430942238274,33.2526849145038,31.6927456508727,35.3217392324549,36.1790600621128,21.3612190354752,22.8769497970823,35.3867379558563,33.799904761281,34.6976384474829,19.3657022090172,22.0545121269354,38.2408274883897,22.3993545229192,26.1766506337878,33.43369336738…
ENSG00000062822,61.1585863398458,57.3731311095508,66.9408086915609,57.0904575507123,58.2945448928815,66.2247228380448,54.035913974825,58.4773296277868,63.8764182438866,73.2914030387758,58.7863575211528,58.2556701816469,56.3417951778881,56.2597410477407,66.9330547382088,66.4808253337757,58.9119856578709,59.7920563548426,55.2609827283954,53.5884884535286,51.7486135938302,52.8566983951484,52.2422716…
ENSG00000063015,1.16557843921231,1.88623992688934,2.94707962793035,3.72643670958388,2.81144950762913,4.38712674952347,3.71907100231589,3.96456472052792,2.87763619452437,3.30197057901011,1.24811799407968,1.6982007784257,6.1934895428301,5.78781343787094,4.49192119400889,2.33670227658321,1.56221594905729,1.87526352861991,2.13775561811975,1.97620383664833,1.97227020956521,1.86976075955627,1.972689944…
ENSG00000063046,1117.6525963294,1125.98044524589,1167.07160008545,1131.71521080091,944.876540645642,927.668396726618,850.026492911669,850.257540956077,928.730437003162,899.339519477491,939.583225943181,922.344527134517,846.454103998928,874.234133072913,959.865267052602,963.379563945684,897.16417516519,1045.38729168527,974.994708164114,941.006671048193,1008.9805680434,992.075881987125,890.56747419…
ENSG00000063127,0.68563437600724,0.523955535247039,0.30874167530699,0.18089498590213,0.860647808457896,0.417821595192712,0,0,0.213158236631435,0.216016766851129,0.124811799407968,0.221504449359874,0.47399154664516,0.329164745281759,0.445763171924546,0.756959892414278,0.0822218920556468,0.757317963481118,0.213775561811974,0.410639758264587,0.610464588674947,0.575311002940391,0.0680237911849193,0.2…
ENSG00000063169,18.7863819025984,16.6617860208558,14.0898473640099,14.5801358637117,22.089960417086,21.9356337476174,17.392126157889,16.3538294721777,21.7421401364064,19.8735425503038,20.2195115040908,14.5454588412984,18.4856703191613,14.4283880015171,17.9333953012721,19.5822233037607,19.2810336870492,19.9787691318352,15.8906500946901,19.1204137441948,19.3235521722878,17.4031578389468,18.19636414…
ENSG00000063176,16.5237884617745,14.7231505404418,20.0401414699264,16.895591683259,25.3030455686621,29.5608778598844,17.6108950403782,16.9909916594054,31.1211025481895,33.7911942431408,24.7127362827776,25.842185758652,13.8721525984817,14.1266536516755,27.4658692855047,29.3239680061357,18.3765928744371,17.2379993592369,16.0687963962001,18.8380989103879,17.2104055191822,16.7799042524281,17.51612623…
ENSG00000063177,341.92586331481,340.728284571149,356.344028154322,320.943883987559,350.513164124619,393.692398070333,301.572904511321,287.997308626921,337.500541333105,363.556218610449,317.770841292686,337.794285273808,308.916090666873,298.195828829834,346.426563534899,328.849706304498,319.555383474271,352.874108222035,325.081370995409,287.370835830536,322.395741042142,315.534113821015,303.760239…
ENSG00000063180,12.4785456433318,12.0509773106819,48.5285778732532,48.5883932133122,23.4669969106186,27.8895914791135,35.7687122869793,39.5748514066984,33.3237376600476,38.82129895696,13.6044861354685,15.5053114551912,21.5508156541333,19.1738464126625,23.7626060110547,22.2809498767159,11.881063402041,20.8442753758136,25.154257773209,16.2459354363427,24.6064188050517,22.0056458624699,12.4143418912…
ENSG00000063241,19.88339690421,20.2246836605357,19.7875346446752,13.8927349172836,23.9833855956934,26.2183050983427,20.3455060714928,19.9644151998013,16.7329215755676,19.2254922497504,18.9713935100111,20.9690878727348,23.699577332258,24.1113175918889,24.0712112839255,22.4455063750668,20.3499182837726,29.5714633359294,23.1233899359952,20.4806579434463,24.5594599905383,22.1734449049942,20.237077877…
ENSG00000063244,148.302715530366,133.503870380946,199.615526798483,174.96163036454,161.457528866701,175.171703784544,198.423376417677,180.670877978344,171.201590387814,180.559157549422,160.008726841015,168.491051146411,185.172697556043,187.870778369564,157.765873386526,160.804610188529,180.5592749542,165.455943640541,140.236768548655,175.060861945172,139.491158512225,144.427033029827,177.06592845…
ENSG00000063245,85.9099873137071,79.8508235716487,79.1782060037289,74.6010921860385,85.0320034756401,91.8162955435984,79.4131043435686,66.1940716731001,81.4974991387519,91.6219686830001,81.0028578157711,87.0512485984306,79.5357815270579,77.9571838408967,80.8888709669234,81.6529344817314,82.180781109619,90.6617790567396,76.4960218683849,73.9151564876257,79.806505265621,80.5675117034439,80.57418065…
ENSG00000063322,36.4071853659844,32.6948253994152,47.5181505722485,44.1383765601198,43.0323904228948,44.2890890904275,49.004229677574,44.0349867172923,45.9711263668461,46.9682170210597,43.5593179933807,39.3539571696043,51.1910870376773,52.6663592450815,38.4042117350378,33.3720578655686,37.0820733170967,45.0063246868779,41.3655712106171,37.0345731984875,44.2117238644202,42.3093300079079,39.5898464…
ENSG00000063438,1.64552250241738,1.88623992688934,0.954292450948877,0.036178997180426,2.35243734311825,3.44702816033987,1.09384441244585,1.20352857587455,2.20263511185816,2.1293081303897,1.99698879052748,0.221504449359874,3.41273913584516,2.60588756681393,2.571710607257,2.92910567064655,0.24666567616694,2.81289529292987,3.66981381110556,2.13019374599755,2.46533776195652,3.64363635195581,1.2244282…
ENSG00000063515,0.548507500805792,0.104791107049408,0.168404550167449,0.253252980262982,0.0573765205638597,0,0,0.424774791485134,0,0.123438152486359,0.374435398223903,0.221504449359874,0.379193237316128,0.329164745281759,0.342894747634266,0.526580794722976,0.205554730139117,0.180313800828838,0.106887780905987,0.15398990934922,0.211314665310559,0.287655501470195,0.374130851517056,0.235666426239779…
ENSG00000063587,20.7061581554186,21.1154080704557,45.0201497447647,42.3294267010985,31.7292158718144,34.1569154070042,24.9396526037654,28.5307068280849,21.0671390537401,21.9719911425719,22.9653710910661,19.3447219107624,66.0428221658924,66.2169745925139,21.6023691009588,22.2151272773755,39.4253972406826,72.5222106933585,68.0875164371139,34.8530494827068,60.4359942788198,63.4280380741781,37.889251…
ENSG00000063601,28.0424459786961,23.0540435508697,44.2061944189553,40.9546248082423,46.7044877389818,50.6608684171163,74.6001889288069,80.0700481949478,31.8316300036276,29.6868756729694,28.4570902650166,31.8228058913686,85.3184783961289,86.3783152410217,30.140448317052,27.7113143222966,67.9152828379642,63.6507716925797,61.0329228973187,63.7774874554687,57.9236977023498,56.5243060388934,66.2211607…
ENSG00000063660,27.2882481650881,30.5466077049024,45.3850262701275,37.9155890450865,26.7374585827586,31.127708841857,17.5015105991336,19.3980488111545,21.3868764086873,19.1946327116288,20.9683823005386,25.3991768599323,28.9766832182408,27.4029650447065,23.0768165157861,22.5442402740774,15.3754938144059,18.1035056032153,17.9927764525079,15.3219959802474,16.5060233014803,17.6428707568386,13.5367344…
ENSG00000063761,9.87313501450425,11.1078573472372,8.6166994835678,8.68295932330225,9.00811372852598,9.81880748702873,6.01614426845217,6.15923447653445,6.53685259003067,8.20863714034288,9.86013215322945,9.30318687311472,6.41468559793117,7.37877637339944,9.46389503470575,8.75440571226947,7.64663596117515,8.29443483812653,8.26598839006301,8.28979011996635,6.80902810445134,7.862583706852,7.7207002994…
ENSG00000063854,9.39319095129918,11.1078573472372,9.62712678457249,8.14027436559586,12.6228345240491,15.1460328257358,11.594750771926,8.77867902402611,10.9776491865189,10.2453666563678,13.7292979348764,13.2902669615925,10.5226123355226,9.79265117213234,12.8928425110484,13.1645198680744,11.0588444814845,11.0352046107249,10.4750025287868,9.70136428900087,10.0726657131366,11.002822931235,8.536985793…
ENSG00000063978,114.843757981213,109.349520206057,105.814192355214,103.110141964214,100.408910986755,97.4568870787,92.1016995279405,96.3530818685447,95.423837265339,96.4360566299681,90.2389309719607,98.7909844145039,115.306343580546,111.339975091555,81.6432394117188,82.4098943741457,109.067339811815,115.833585652445,109.203682825617,91.2646862743045,101.360601127298,104.275119282946,106.695316473…
ENSG00000064012,4.66231375684923,4.71559981722335,5.8660918308328,7.0910834473635,12.8523406063046,11.6990046653959,7.87567976961011,8.56629162828355,7.99343387367881,8.08519898785653,5.61653097335855,5.75911568335673,12.2605813398882,12.7002730887879,7.50939497319043,6.74681643238813,9.61996137051067,11.2515811717195,11.3301047760346,11.2155983976015,10.8944449671221,10.1877990104027,9.625366452…
ENSG00000064042,29.8936587939157,23.9447679607897,23.2678953481358,19.5004794802496,51.7536215486015,49.7207698279327,81.8195620509495,75.8930960786774,40.2158539777974,34.9329971536396,19.5954525070509,15.4314766387379,79.883375327931,79.0269692630624,28.8717377508052,30.7391538919537,13.5666121891817,6.45523406967239,7.98095430764705,11.85722301989,13.6884944306729,9.30086121420298,13.570746341…
ENSG00000064102,96.4001932666179,96.5650051460293,74.1541369237333,72.8283213241976,78.7779627341794,77.4014505094499,69.568504631556,67.9639666376215,83.5580287595224,82.2715286321584,91.9862961636722,90.7429894210952,65.4108334370322,65.6957970791511,84.9350289890078,87.5440571226948,75.2741421769446,61.7755081639598,61.8880251445666,68.576839630186,65.2257933591925,65.0580859158425,76.18664612…
ENSG00000064115,106.890399219529,107.04411585097,63.4604479881003,60.4551042884919,101.441688356904,108.738070148903,83.3509442283737,79.5744776048819,85.3343473981177,85.5426396730469,86.9938241873535,77.9695661746757,64.8104441446149,65.3117715429891,94.5017924480038,93.5668249623388,79.5907915098661,64.4802151763923,57.1849627847032,77.8162341911393,64.7327258068012,60.7192821020004,81.5945375…
ENSG00000064195,0.34281718800362,0.209582214098816,0.954292450948877,0.832116935149799,0.229506082255439,0.104455398798178,0.43753776497834,0.637162187227702,0.177631863859529,0.154297690607949,0.624058997039839,0.443008898719749,1.23237802127742,0.521177513362786,0.377184222397693,0.296201697031674,0.24666567616694,1.73101248795684,1.95960931660977,0.436304743156124,1.17397036283644,1.3903349237…
ENSG00000064199,3.83955250564054,4.97757758484687,5.13633878010719,4.55855364473368,4.18848600116176,2.8202957675508,2.84399547235921,2.61944454749166,5.00921856083872,3.54884688398283,6.36540176980635,4.87309788591723,2.40155716966881,3.18192587105701,4.93768436593343,5.1670740482192,2.75443338386417,2.41620493110642,3.99047715382352,3.49043794524899,2.72361124178053,3.02038276543705,2.448856482…
ENSG00000064201,0.137126875201448,0,0.140337125139541,0.036178997180426,0.0573765205638597,0,0.109384441244585,0,0.106579118315717,0.277735843094308,0,0.369174082266457,0.0315994364430107,0.0822911863204399,0.0342894747634266,0,0,0.0360627601657675,0,0,0.0234794072567287,0.0239712917891829,0.0340118955924597,0.0471332852479557,0.124516971429737,0.0516064534179638,0.132943352870578,0.1168956057363…
ENSG00000064205,0.068563437600724,0,0,0,0.114753041127719,0.313366196394534,0,0,0,0.0925786143647694,0.124811799407968,0,0.0631988728860214,0,0.10286842429028,0.16455649835093,0.0411109460278234,0.0360627601657675,0.0356292603019958,0.0513299697830734,0.0234794072567287,0.0958851671567318,0.102035686777379,0.141399855743867,0.0622584857148683,0.0774096801269457,0.2991225439588,0.4091346200773,0.3…
ENSG00000064218,0.068563437600724,0,0.196471975195357,0.18089498590213,0,0,0,0.0707957985808557,0,0,0,0.0738348164532914,0.0315994364430107,0.0548607908802932,0.0342894747634266,0,0.164443784111294,0.396690361823443,0.24940482211397,0.513299697830734,0.305232294337474,0.359569376837744,0.204071373554758,0.0471332852479557,0.0933877285723024,0.154819360253891,0.132943352870578,0.0292239014340928,0…
ENSG00000064225,4.31949656884561,3.87727096082809,3.95750692893505,5.49920757142476,5.22126337131123,3.23811736274352,3.28153323733755,3.82297312336621,3.19737354947152,2.74649889282149,6.49021356921432,5.61144605045015,5.08750926732472,4.16942010690229,5.96636860883623,7.73415542249371,4.68664784717187,2.84895805309563,4.13299419503151,4.72235722004275,3.78018456833333,4.69837319067986,4.7956772…
ENSG00000064270,3.4281718800362,3.30091987205635,3.36809100334898,3.21993074905792,2.69669646650141,2.50692957115627,3.17214879609296,4.10615631768963,2.73553070343675,1.75899367293062,2.49623598815935,3.17489710749153,4.4239211020215,3.6482425935395,4.28618434542833,3.85062206141176,3.98776176469887,5.5536650655282,5.59379386741333,5.36398184233117,5.42374307630434,4.98602869215005,4.76166538294…
ENSG00000064300,9.46175438889991,11.7366039895337,17.6544103425542,16.2443697340113,9.63925545472843,8.0430657074597,10.0633685945018,11.6813067658412,3.73026914105011,4.96838563757596,10.1097557520454,9.74619577183447,15.5469227299613,13.1665898112704,12.8242635615216,10.432881995449,12.0455071861523,20.5557732944875,17.4583375479779,10.1889990019401,13.5945768016459,13.9752631130937,12.34631810…
ENSG00000064309,62.598418529461,62.82226867612,35.8701691856666,35.5277752311784,59.0404396602117,54.4212627738507,46.0508497639702,41.203154774058,56.0961426068393,57.0592859868195,56.7893687306253,45.1869076694144,31.6310358794537,26.4429012043013,51.6056595189571,54.0732653581156,59.4053170102048,49.1174793457754,44.9284972408166,50.8680000550257,45.9022411869047,46.3125357367014,62.9220068460…
ENSG00000064313,65.5466463462921,66.2803752087504,66.8846738415051,65.4839848965711,68.1633064298654,73.4321453551191,56.5517561234504,60.3888161894699,61.7803622503442,60.6081328708023,72.7652790548452,71.1029282445196,63.3568700682365,65.5860754973906,63.2983704132856,62.4985580736832,62.4064160702359,59.3593032328533,62.5293518300025,65.7280263072255,56.4444950451759,62.5890428615567,68.840076…
ENSG00000064393,116.763534234033,112.126484542866,159.058097633155,167.364040956651,149.465836068855,146.446469115045,95.930154971501,83.8222255197332,121.819932234865,117.358823476406,217.921401766312,168.048042247691,161.409921350899,143.049512220365,115.17834573035,115.979420037735,106.559572104118,114.210761444986,91.2465356334111,130.480783188573,98.1908811476396,115.469712548494,122.9189906…
ENSG00000064419,220.020071260723,214.035836148415,237.282011185935,218.521142969773,237.309289052124,244.530088586535,230.363633261096,229.590774797715,242.289862304398,245.271608990396,259.858166367389,250.004688510845,236.04779022929,237.958680443272,231.385375703603,229.655049098558,240.62236710085,253.773643286506,224.856261765895,218.46035139676,236.484589889772,242.685358073688,232.70938964…
ENSG00000064489,0.891324688809412,0.104791107049408,0.477146225474438,0.253252980262982,0.0573765205638597,2.19356337476174,0,0.283183194323423,0.284210982175246,0.894926605526104,0,0.221504449359874,0.600389292417203,0.548607908802932,0.548631596214826,0.197467798021116,1.15110648877905,1.4425104066307,0.605697425133928,0.30797981869844,0.328711701594202,0.647224878307939,0.374130851517056,0.329…
ENSG00000064490,16.4552250241738,15.03752386159,16.3633087912704,17.1126656663415,16.4096848812639,19.3242487776629,18.1578172466011,15.0795050977223,17.7987127587248,19.3180708641152,16.3503457224438,15.4314766387379,12.9241695051914,13.4957545565521,18.3791584731967,16.6860289327843,17.3488192237415,20.483647774156,16.95952790375,16.784900119065,15.5198881966977,15.4375119122338,17.244031065377…
ENSG00000064545,8.43330282488905,8.12131079632911,7.49400248245147,6.114250523492,10.3277737014948,12.0123708617905,8.86013974081138,6.08843867795359,9.34343603901123,10.1219285038815,5.24209557513464,8.93401279084826,6.44628503437418,6.61072530107533,11.5555529952748,9.93921250039617,7.97552352939774,8.29443483812653,6.55578389556722,7.49417558832871,8.28823076162525,6.54416265844694,5.884057937…
ENSG00000064547,18.3064378393933,16.3474126997076,18.5806353684752,17.4382766409653,13.8851179764541,14.2059342365522,15.6419750979756,14.6547303062371,15.5250249013228,16.3864147425642,13.6044861354685,12.9949276957793,13.3033627425075,13.0020074386295,13.9558162287146,14.4151492555415,14.7999405700164,20.7721498554821,19.5960931660977,12.8068274608768,18.3374170675052,16.1326793741201,15.101281…
ENSG00000064601,41.9608238116431,38.4583362871327,26.7482560515965,26.917173902237,32.5898636802723,27.6806806815172,45.2851586752582,43.7518035229688,28.8829410635594,29.8720329016989,32.2014442472557,32.8564933217147,29.9246663115311,29.7071182616788,29.2146324984395,31.496113784368,36.5887419647628,25.0636183152084,33.0995828205541,25.9729647102351,31.0397763933954,30.6353109065758,35.30434762…
ENSG00000064607,139.937976143078,150.846798597623,116.19913961554,112.842292205749,135.408588530709,145.819736722256,148.762840092635,147.963219033989,132.939686912472,130.350689025595,135.545614157053,144.199396533278,107.659279961337,101.657045501183,147.719057280842,156.855254228106,136.529451758401,131.376635283891,137.707091067214,173.623622791246,133.57434788353,134.574832104473,128.1228106…
ENSG00000064651,42.6464581876503,41.2876961774667,52.6544893523557,52.6404408975199,49.4011842054832,45.7514646736019,46.2696186464594,43.3270287314837,43.6974385094441,41.9689718453621,58.2871103235209,57.517322017114,55.7414058854709,59.5239581051182,45.9478961829917,46.9315133296852,66.5586216190461,63.8310854934085,60.2134499103728,63.4438426518787,59.7316120611179,63.9314352017509,70.6086952…
ENSG00000064652,14.4668853337528,16.8713682349547,17.2614663921635,15.629326781944,12.1064458389744,13.2658356473686,13.4542862730839,10.4069823913858,16.3066051023048,13.3621800066484,16.5999693212597,15.1361373729247,13.1769649967355,13.3037417884711,19.9564743123143,18.9898199096973,18.0065943601866,22.4310368231074,21.6625902636134,21.661247248457,21.3427811963664,19.6804305589192,18.94462584…
ENSG00000064655,1.50839562721593,1.51947105221641,1.57177580156286,1.6642338702996,1.66391909635193,1.98465257716538,1.96891994240253,1.20352857587455,1.06579118315717,1.203521986742,1.87217699111952,1.55053114551912,1.32717633060645,1.92012768081026,2.26310533438616,1.6455649835093,1.10999554275123,0.973694524475723,1.31828263117384,1.36024419925144,1.47920265717391,0.910909087988952,1.462511510…
ENSG00000064666,328.281739232266,314.058947827075,420.702633743315,398.005147981867,330.201875845013,347.836477997933,454.929891136229,411.606772949095,331.461057961881,348.373325854627,306.662591145377,298.883337002924,425.676008323797,408.191714544822,354.587458528595,340.434483788404,408.478359732453,523.054273444292,454.593732193164,346.88793579401,442.117238644202,417.699759426513,401.306356…
ENSG00000064687,10.7644597033137,12.732119506503,10.9462957608842,8.6106013289414,10.8441623865695,14.9371220281394,6.45368203343051,6.44241767085787,9.30790966623932,9.78247358454396,7.48870796447806,8.41716907567522,8.40545009384085,6.85759886003665,14.1958425520586,15.5012221446576,10.3599583990115,12.4416522571898,12.3277240644905,12.2678627781545,12.3032094025259,10.6432535543972,8.468962002…
ENSG00000064692,11.8614747049252,13.7276350234724,6.51164260647469,6.76547247273967,13.8277414558902,16.3994976113139,4.70353097351715,7.92912944105584,11.7592293875008,10.152788042003,11.8571209437569,10.9275528350871,7.61546418276558,6.85759886003665,10.766895075716,13.8227458614781,17.7599286840197,17.3461876397342,14.8574015459322,20.3010030492055,16.2477498216563,15.7731099972824,17.44810243…
ENSG00000064703,67.6721129119146,60.7264465351318,125.068445924359,118.739468746158,59.4994518247225,64.9712580524667,85.7574019357546,82.5479011452778,71.3369565259868,69.7734156929145,73.0149026536611,70.43841489644,117.139110894241,115.92085113006,57.6748965520836,58.0555326182081,67.6275062157695,104.834443801886,101.721538162198,54.9743976376716,94.0350260631986,94.4229183575916,63.364161488…
ENSG00000064726,66.2322807222994,62.3507086943976,64.7234821143562,63.4579610544673,54.2208119328474,61.8375960885214,49.8793052075307,48.8491010207905,61.8869413686599,59.7440658033978,54.6675681406899,61.4305672891385,39.1517017528903,42.0233658143046,55.2060543691169,52.4935229739467,52.6631218616418,56.7988472610838,53.1232271102757,49.1227810824012,55.8105510492442,58.2022964641362,51.664069…
ENSG00000064763,19.88339690421,17.1857415561029,22.1451983470195,23.9866751306225,26.4505759799393,25.0692957115627,21.0018127189603,21.1679437756759,21.3158236631435,20.8301882320731,25.7112306780413,24.070150163773,25.7219412646107,25.4279765730159,26.9172376892899,26.2632171368084,14.2243873256269,11.9728363750348,12.9334214896245,14.346726554369,15.2850941241304,14.8142583257151,11.5300326058…
ENSG00000064787,0.548507500805792,0.838328856395262,0.364876525362806,0.289431977443408,0.745894767330176,0.417821595192712,0.875075529956679,0.353978992904279,0.42631647326287,0.462893071823847,0,0.147669632906583,0.537190419531182,0.768051072324105,0.548631596214826,0.394935596042232,0.904440812612115,0.793380723646885,1.21139485026786,1.15492432011915,0.915696883012421,1.00679425514568,0.91832…
ENSG00000064835,0,0,0,0,0,0,0,0,0,0,0,0,0,0.0274303954401466,0,0,0,0.072125520331535,0.0356292603019958,0,0,0,0.0340118955924597,0.0942665704959114,0,0,0,0.0292239014340928,0,0,0,0,0,0,0,0,0,0,0,0.124491028802991,0,0,0,0,0,0
ENSG00000064886,0.137126875201448,0,0,0,0.172129561691579,0.313366196394534,0,0,0,0,0,0.0738348164532914,0.0947983093290321,0.0548607908802932,0.10286842429028,0.032911299670186,0.0411109460278234,0.0360627601657675,0.0712585206039915,0.0256649848915367,0.164355850797101,0.0239712917891829,0.0680237911849193,0.0942665704959114,0.124516971429737,0.0516064534179638,0,0.175343408604557,0.13304703828…
ENSG00000064932,22.2831172202353,23.0540435508697,24.1660529490289,24.1313911193442,25.3030455686621,28.9341454670953,20.3455060714928,19.1856614154119,22.1329302368973,22.8977772862196,20.8435705011306,22.7411234676138,22.3724010016516,21.4779996296348,23.4882902129472,23.1037323684706,22.1587999089968,26.5061287218391,24.7267066495851,22.4568617800946,23.9489954018633,24.1870334152856,20.985339…
ENSG00000064933,76.8596135504116,78.2265614123829,53.4123098281092,56.6563095845472,64.0895734698313,63.0910608740995,52.2857629149116,48.9906926179522,72.3316949636002,71.1929544465076,71.0179138631336,71.3244326938795,43.9232166557849,46.1927859212069,73.859528640421,74.2478920559396,77.9463536687531,43.2031866785895,44.4653168568907,71.8362927114112,48.7197700577121,50.1958850065491,72.1052186…
ENSG00000064961,41.5494431860387,43.7502871931278,42.2414746670018,36.938756121215,40.4504469975211,51.2876008099054,26.0334970162112,25.9112622805932,34.2474233521172,33.0505653282227,30.5788908549521,33.447171853341,29.7666691293161,31.1060684291263,37.5812643407156,35.7087601421518,36.6298529107906,51.8943118785395,43.0757757051129,39.7037316272073,44.4699973442442,41.278564460973,33.977883696…
ENSG00000064989,3.01679125443185,2.41019546213638,6.00642895597234,5.82481854604859,4.53274512454492,2.71584036875263,1.31261329493502,2.05307815884482,3.48158453164677,4.16603764641462,2.87067138638326,3.98708008847774,1.80116787725161,1.39895016744748,5.21200016404085,5.26580794722976,1.72665973316858,1.00975728464149,1.6389459738918,2.05319879132294,1.99574961682194,2.1094736774481,1.496523406…
ENSG00000064995,31.539181296333,34.5286697727799,40.9784405407459,39.2542119407622,32.9914993242193,35.3059247937842,38.3939388768493,33.840391721649,39.4698001495873,37.0623052840293,33.3247504419274,36.8435734101924,35.1069738881849,37.4973505666804,30.9291062366108,33.5695256635897,39.8776176469887,32.9974255516773,32.9570657793461,34.4424097244422,32.3311437925155,34.7583730943153,36.01859743…
ENSG00000064999,62.1184744662559,66.1231885481763,53.6368492283325,51.120923015942,70.0567316084727,65.5979904452558,49.9886896487753,43.6102119258071,61.9935204869756,60.8550091757751,64.7773238927352,65.9344910927892,46.2931743890107,44.6566837765587,55.5832385915146,61.6428642822584,61.214198635429,54.9957092527955,45.2847898438366,55.6416872448516,53.0869398074637,48.9493778335116,61.35745964…
ENSG00000065000,232.292926591253,231.640742132716,217.803218216567,210.417047601358,209.59642961978,224.788018213679,184.094014614636,180.246103186859,201.185849007303,206.512029109679,214.551483182296,211.610583955133,197.338480586602,197.224543214654,200.93632211368,199.541209900338,219.65578462666,224.418556511571,200.093925856008,214.122968950091,196.287844666252,202.749185952909,207.84669396…
ENSG00000065029,9.11893720089629,8.69766188510085,15.8580951407681,14.5077778693508,11.0736684688249,14.4148450341486,10.5009063594802,13.0264269388775,14.1394963632185,14.9360164508495,10.6090029496773,11.8135706325266,10.5858112084086,10.0120943356535,13.2700267334461,13.4607215651061,9.33218474831591,9.44844316343109,9.61990028153885,8.90574975736323,9.57959816074533,9.70837317461909,7.0744742…
ENSG00000065054,7.47341469847891,7.49256415403266,4.71532740468857,4.63091163909453,5.16388685074738,3.34257276154169,3.17214879609296,3.0442193389768,4.2631647326287,5.92503131934524,5.49171917395058,3.4702363733047,3.44433857228817,3.34650824369789,4.35476329495518,4.60758195382604,2.30221297755811,4.79634710204708,3.17100416687762,2.36117861002138,3.85062279010351,2.9484688900695,2.89101112535…
ENSG00000065057,17.5522400257853,13.8848216840465,12.0689927620005,9.55125525563247,15.4916605522421,17.2351408016994,14.0012084793069,13.3804059317817,18.0473973681281,17.5899367293062,13.6044861354685,16.9081729678037,11.5021948652559,11.3561837122207,14.6073162492197,13.6911006627974,15.5399375985172,10.710639769233,11.1519584745247,10.9589485486862,9.86135104782607,10.1398564268244,13.6047582…
ENSG00000065060,54.9878769557806,52.7099268458521,46.451588421188,44.1745555573002,78.2041975285408,80.0128354794043,53.8171450923358,58.8313086206911,83.0251331679439,80.1422205017687,95.6058383465033,88.15877084523,64.842043581058,54.6962085076524,86.5466343028888,81.7845796804122,58.0897667373145,68.4831815547925,58.859538018897,55.1797175168039,70.461701177443,62.9725835301836,57.548127342441…
ENSG00000065135,133.630139883811,131.093674918809,164.755784913821,170.511613711348,165.990273991246,154.280624024909,140.340238116802,141.520801363131,165.517370744309,159.698109779227,172.240283182995,169.229399310944,170.668556228701,170.562198846832,157.663004962236,153.136277365375,164.772671679516,167.403332689493,152.600121873448,158.096306931866,167.830803071097,167.918898983226,169.78738…
ENSG00000065150,750.838205165528,746.74142883408,777.299268722888,768.695153092512,722.31301737843,721.055617903823,668.776473769392,651.462938541035,755.14857963963,740.968369837492,780.448181698022,739.60335641262,739.711207694437,755.131356071796,700.87686416444,701.241062072653,676.316173103723,584.144589165102,543.595624427549,613.059494104137,589.098328071324,599.929519607881,669.4221290507…
ENSG00000065154,184.504210583548,178.878419733339,138.007528862224,127.132996092017,158.187067194561,154.593990221303,190.438312206822,197.803461234911,150.169977706846,141.953875359313,152.395207077129,150.253851482448,214.623372320929,207.318928736628,156.017110173591,154.650197150204,188.12368902332,162.138169705291,162.861348840423,163.17797394039,158.321643132122,168.326410943643,185.0587239…
ENSG00000065183,117.654858922842,113.750746702132,97.8149762222599,98.3706933335784,95.5892832593903,100.381638245049,118.463349867885,119.14932901158,120.079139969042,113.100207215627,98.9757569305184,106.838979407913,117.549903568,117.539244461028,89.6669765063606,93.6984701610195,121.565067404274,92.2846032641991,81.6978938724763,93.3692150354105,90.2548414948653,89.0054064132363,121.558514847…
ENSG00000065243,75.008400735192,77.0738592348394,76.1749915257427,77.4592329632921,85.9500278046619,81.8930326577715,70.881117926491,70.9373901780175,89.0646165391678,80.1730800398903,77.38331563294,82.6949944276864,74.6378688783913,75.1592835060017,73.1051601956256,79.4807887034992,78.7274616432818,71.9091437705404,69.3345405476837,82.6412513507481,72.1991773144409,73.4959806256349,78.2273598626…
ENSG00000065268,21.0489753434223,19.4387503576651,27.8990204777407,21.1647133505492,25.1309160069706,25.0692957115627,16.1888973041986,15.3626882920457,23.1276686745107,25.0579449547309,22.4661238934342,23.6271412650533,15.1045306197591,17.2811491272924,22.9396586167324,23.0379097691302,17.5543739538806,19.7263298106748,15.0711771077442,14.2184016299113,17.398240777236,17.5230142978927,16.6658288…
ENSG00000065308,52.656720077356,50.5093135978146,88.5246585380223,86.0698342922335,53.0732815215702,51.8098778038963,71.5374245739585,80.5656187850138,50.5185020816501,51.8440240442708,54.5427563412819,48.2141351439993,104.941728427239,96.4178399721154,53.6630280047627,53.8757975600945,61.0086439052899,74.1089721406523,70.2609013155356,51.1246499039411,63.535276036708,63.9074639099617,58.12632956…
ENSG00000065320,12.0671650177274,13.3608661487995,9.40258738434923,10.6004461738648,10.4425267426225,12.1168262605886,5.35983762098466,5.52207228930675,4.54737571480394,4.56721164199529,21.5924412975784,20.8952530562815,6.73067996236128,5.87010462419138,9.29244766088862,8.85313961128003,13.0732808368478,10.3500121675753,7.33962762221112,10.3943188810724,9.15696883012421,10.1638277186136,10.917818…
ENSG00000065325,0,0,0,0,0,0,0,0.0707957985808557,0,0.0925786143647694,0,0.0738348164532914,0,0,0,0.032911299670186,0.0822218920556468,0,0.142517041207983,0,0,0,0,0,0.0311292428574341,0,0,0,0,0.0306607812275074,0,0,0,0,0,0,0,0,0.0588236643601712,0.0414970096009971,0.050688859060185,0.269678057256535,0,0.143316684393348,0,0
ENSG00000065328,105.039186404309,90.3823298301142,112.915250887274,109.58618245951,86.6385460514282,85.131150020515,101.618145916219,103.786640719535,103.346218393474,102.700542868651,105.091535101509,97.6096273512513,116.886315402697,118.142713160711,80.9574499164503,82.1136926771141,105.285132777256,90.3732769754134,88.0399022062315,87.8769082686216,87.3668744022877,91.7141623854139,105.0287335…
ENSG00000065357,12.7527993937347,14.1467994516701,9.23418283418178,8.53824333458054,11.876939756719,16.9217746053048,6.67245091591968,7.07957985808557,10.1250162399932,11.8500626386905,11.9819327431649,8.49100389212851,7.10987319967741,5.81524383331108,13.4071846324998,14.1189475585098,7.60552501514733,9.23206660243649,8.65791025338497,7.93048033148484,8.61694246321945,7.862583706852,7.8907597774…
ENSG00000065361,73.9113857335804,68.9001528849856,50.8862415755975,50.7591330441377,76.9992905966998,77.1925397118535,64.3180514518159,52.8136657413184,92.2264637158675,98.3802075316282,88.4915657802491,84.3193603896588,54.6354256099655,56.9455009337444,67.0702126372625,71.2200524862825,77.3708004243636,56.3660941390946,49.4890425594721,74.120476366758,58.6280799200517,61.7021050653569,79.1456810…
ENSG00000065371,0.137126875201448,0.419164428197631,0.112269700111633,0,0.229506082255439,0,0.109384441244585,0,0.319737354947152,0.216016766851129,0.249623598815935,0.738348164532914,0,0.0822911863204399,0.41147369716112,0.16455649835093,0.0822218920556468,0.0360627601657675,0,0.282314833806904,0.0704382217701862,0.0719138753675488,0.102035686777379,0.0471332852479557,0.0622584857148683,0.154819…
ENSG00000065413,0.754197813607964,1.10030662401878,0.75782047575352,0.470326963345538,1.26228345240491,1.46237558317449,0.328153323733755,0.707957985808557,1.45658128364814,1.72813413480903,1.87217699111952,1.18135706325266,1.1691791483914,1.20693739936645,1.78305268769818,1.84303278153042,1.397772164946,1.19007108547033,0.605697425133928,2.3098486402383,1.10353214106625,1.15062200588078,1.938678…
ENSG00000065427,229.481825649623,227.44909785074,202.618741276469,186.973057428442,196.055570766709,208.70188679876,207.064747275999,205.237020085901,220.974038641254,216.04762638925,229.404087311845,222.390467157314,197.496477768817,201.915140834919,189.997979664147,189.27288440324,225.205762340417,185.218336211382,173.407609889813,179.295584452275,175.34421339325,181.486650135904,212.8804545132…
ENSG00000065457,29.2765878555091,30.6513988119518,33.2598986580711,32.0907704990379,37.3521148870727,36.7683003769586,34.784252315778,33.6280043259065,36.1303211090282,36.1673786785032,45.3066831850923,47.2542825301065,38.266917532486,38.4025536162053,40.2901328470263,38.7695110114791,33.9576414189821,29.8960281774213,29.5366567903545,36.5726034704398,32.2372261634886,33.2721530033859,32.71944355…
ENSG00000065485,26.1226697258758,23.2636257649685,16.0545671159635,15.1951788157789,17.3277092102856,20.4732581644429,17.8296639228673,18.6900908253459,19.2908204151449,21.0770645370458,17.4736519171155,18.237199663963,16.4949058232516,17.4183011044931,17.3504742302939,18.5290617143147,14.5532748938495,20.2312084529956,16.78138160224,16.1689404816681,20.0044549827329,16.8278468360064,15.679483868…
ENSG00000065491,31.1278006707287,32.7472209529399,24.0257158238894,22.5756942405858,34.8849245028267,30.6054318478661,24.502114838787,23.5042051288441,31.68952451254,31.0446953503193,34.5728684360071,27.1712124548112,20.4764348150709,21.4505692341947,30.140448317052,28.30371771636,29.106549787699,23.0080409857597,23.1946484565992,28.7704480634126,23.1506955551345,23.4199520780317,29.3182540007002…
ENSG00000065518,69.7290160399363,75.554388182623,89.0579396135525,81.8368916221237,115.326806333358,109.469257940491,98.6647660026156,107.184839051416,99.7225283707396,105.447041761472,81.252481414587,85.2792130035516,76.5970339378579,71.9499272395046,74.2024233880552,73.260553065834,85.7574334140396,97.5137034882354,95.0232372254227,93.5488699296512,98.6604692927742,91.3545930085762,85.914048266…
ENSG00000065526,159.272865546482,164.102873639373,146.427756370597,151.11967122264,200.703068932381,202.330107472071,169.327115046617,169.201958608245,195.430576618254,183.151358751635,239.638654863298,193.668723556983,213.011801062335,176.404873075583,156.668610194096,165.840039038067,181.833714281063,171.081734226401,147.077586526638,187.867689406049,146.088871951366,164.562918132741,207.540586…
ENSG00000065534,33.8017747371569,38.8775007153303,40.5854965903552,33.3932143975332,29.0898959258769,31.2321642406552,19.4704305415361,20.106006796963,31.8671563763995,33.2357225569522,45.4314949845002,38.3202697392583,24.6791598619914,22.2734810973991,42.8275539795199,42.817600870912,28.1198870830312,32.5646724296881,26.4369111440808,28.359808305148,27.9404946355072,29.7004305267977,27.991790072…
ENSG00000065548,116.215026733227,110.135453508928,134.274561333513,128.941945951038,116.416960224071,108.529159351307,142.309158059205,140.954434974484,136.669956053522,125.505741540506,141.037333331004,145.454588412984,140.807088790056,145.353665437337,117.235714216156,118.57941271168,133.240576076176,110.17173230642,112.944755157327,121.780353310342,116.152627699037,122.205645541255,137.3740462…
ENSG00000065559,62.8041088422632,56.3252200390567,76.1188566756869,76.1206100676164,65.4092334428001,61.2108636957323,71.9749623389369,75.114342294288,61.2474666587656,60.5155542564376,73.389338051885,69.1093882002808,78.6509973066536,83.059237392764,57.3320018044493,61.215017386546,65.407515130267,62.4246378469436,58.752650237991,59.2861150994498,59.7785708756314,61.4623921474651,64.248470774156…
ENSG00000065600,12.4785456433318,12.1557684177313,8.11148583306545,7.0910834473635,8.72123112570668,9.40098589183602,14.3293618030406,12.9556311402966,11.8658085058165,11.3871695668666,14.1037333331004,10.9275528350871,8.78464333115697,9.57320800861117,13.8186583296609,14.9746413499346,11.0588444814845,10.1696983667464,8.69353951368696,11.2412633824931,7.93603965277432,8.91732054557605,11.5640445…
ENSG00000065609,0.959888126410136,1.46707549869171,2.0769894520652,2.31545581954727,2.98357906932071,1.35792018437631,0.984459971201264,1.62830336735968,0.497369218806681,0.524612148067026,0.873682595855774,1.55053114551912,1.1691791483914,1.5909629355285,1.85163163722504,2.56708137427451,0.411109460278234,0.57700416265228,0.570068164831932,0.795614531637638,0.962655697525879,0.862966504410586,0.…
ENSG00000065613,88.6525248177361,89.4916054201943,87.6265009371292,92.3649798016277,112.68748638742,109.051436345298,100.633685945018,102.724703740822,90.6277769411317,86.1289708973571,126.434352800271,108.389510553432,141.976267938447,133.119709071032,102.114055845485,107.027546527445,92.1296300483522,92.2124777438676,90.1420285640493,98.5022120137178,97.9560870750723,97.9227269588123,99.3487470…
ENSG00000065615,17.2779862753824,18.0240704124981,16.3913762162984,17.0041286748002,15.7211666344976,14.2059342365522,12.2510574193935,15.6458714863691,15.7737095107262,17.3430604243335,16.9744047194836,17.9418603981498,16.2105108952645,16.6228196367288,16.1846320883374,18.2986826166234,11.7166196179297,13.956288184152,14.1448163398923,13.8590918414298,15.5198881966977,15.1258851189744,14.7611626…
ENSG00000065618,0.754197813607964,0.366768874672927,1.09462957608842,0.832116935149799,2.23768430199053,1.77574177956903,0.984459971201264,0.566366388646846,1.35000216533242,0.987505219890873,0.374435398223903,0.886017797439497,0.821585347518278,1.45381095832777,1.06297371766623,1.28354068713725,1.31555027289035,0.829443483812653,0.783843726643907,0.975269425878394,1.00961451203934,0.934880379778…
ENSG00000065621,15.6324637729651,14.8803372010159,12.4338692873633,13.0967969793142,10.9589154276972,10.0277182846251,6.78183535716427,9.34504541267296,8.41975034694168,6.78909838674975,14.7277923301402,13.8809454932188,7.64706361920859,7.57078914148047,12.1041845914896,14.3164153565309,9.24996285626026,13.0907819401736,11.6863973790546,11.4209182767338,12.0684153299586,12.057559769959,9.52333076…
ENSG00000065665,17.6208034633861,16.8713682349547,16.6720504665774,17.0403076719807,20.2539117590425,19.4287041764611,15.6419750979756,13.6635891261052,20.0724006161268,20.0586997790334,18.4721463123792,18.0156952146031,12.7029734500903,12.9745770431893,20.4022374842388,17.8050131215706,17.4721520618249,10.0615100862491,10.5462610493907,18.0681493636418,12.115374144472,13.4478946937316,16.5297812…
ENSG00000065675,21.5289194066273,24.2591412819379,11.619913961554,12.1199640554427,37.8685035721474,37.8128543649404,35.1124056395118,33.840391721649,57.3040392810841,56.87412875809,18.5969581117872,20.8214182398282,11.2177999372688,10.3961198718156,15.7731583911762,17.5746340238793,20.3910292298004,17.4183131600657,13.7172652162684,19.2744036535441,20.5914401641511,16.7559329606389,20.6452206246…
ENSG00000065717,7.74766844888181,8.0165196892797,9.59905935954458,8.03173737405458,9.63925545472843,9.40098589183602,12.2510574193935,9.20345381551125,12.0434403696761,12.1277984817848,7.48870796447806,6.42362903143635,4.48711997490752,3.70310338441979,8.70952658991036,7.14175202843036,8.87996434200985,8.79931348044728,8.33724691066701,8.93141474225477,8.10039550357142,8.12626791653302,7.07447428…
ENSG00000065802,33.7332112995562,34.7906475404034,45.8902399206298,46.0558634106823,36.4914670786148,36.7683003769586,39.3783988480506,40.5659925868303,35.846110126853,33.4517393238033,34.3232448371911,30.7152836445692,51.0330898554623,46.4396594801682,30.5519220142131,32.2859849764525,32.0254269556744,45.8718309308563,42.7551123623949,30.8236468547356,39.3280071550207,43.0524400533726,32.0732175…
ENSG00000065809,46.9659547564959,39.1394784829538,42.5782837673367,40.9184458110618,45.7290868893962,48.7806712387491,39.8159366130289,37.6633648450153,45.7579681302147,43.5428082895632,50.174343362003,42.307349827736,36.0549569814752,37.8265153119622,47.8338172949801,46.9973359290256,41.8509430563242,45.0423874470436,41.864380854845,44.4517538321416,46.5361851828364,43.1243539287401,45.133785451…
ENSG00000065833,12.8213628313354,11.2126484542866,11.7883185117214,10.4557301851431,19.7375230739677,21.5178121524247,20.2361216302482,22.3006765529696,18.7579248235663,18.2688465679812,17.5984637165234,17.5726863158834,24.5527621162193,23.7821528466071,11.2469477224039,10.1037689987471,21.2132481503569,13.4874723019971,11.1163292142227,10.9076185789031,12.3971270315528,11.8897607274347,19.590851…
ENSG00000065882,116.969224546835,127.949941707327,109.266485633646,103.797542910642,107.523599536673,113.125196898427,92.8673906166526,88.0699734345846,113.755445615642,111.526370771426,128.431341590799,124.559335356703,105.668515465428,103.385160413913,121.247582763477,117.921186718276,95.5829495146894,99.1004649355292,86.8641366162656,93.9595096879158,93.1428085874429,99.2171767154282,93.532712…
ENSG00000065883,111.964093601982,112.964813399262,87.401961536906,94.7166146183554,128.121770419099,130.778159295319,106.102908007247,108.883938217356,119.937034477954,121.432282508456,138.79072094166,132.607330350111,106.174106448516,103.824046740955,110.137792940126,113.050314367089,132.21280242548,91.0945321787288,87.1491706986816,126.631035454842,91.921879410093,97.0357891626125,137.203986819…
ENSG00000065911,329.173063921076,355.346644004542,211.937126385734,193.883245889903,257.964836455113,259.467210614674,251.474830421301,263.855941310849,302.080747679515,294.893746289912,266.972438933643,269.792419320327,230.012297868675,210.007107489762,347.009484605877,344.811686644539,290.531055578628,360.627601657675,330.390130780407,229.034325172073,396.567188566149,318.962008546868,279.88388…
ENSG00000065923,30.5107297323222,35.0526253080269,26.3833795262337,26.9895318965978,58.7535570573924,48.9895820363455,56.3329872409612,58.6189212249486,37.0540068010978,34.7169803867885,40.6886466069975,36.9174082266457,64.7472452717289,57.4666784471072,35.5581853296734,33.8328160609512,50.8953511824454,51.6779353175449,49.2040084770561,54.6150878491901,51.1851078196687,48.9254065417224,49.181201…
ENSG00000065970,23.8600762850519,26.2501723158767,25.7097613255639,27.0257108937782,23.5817499517463,26.427215895939,18.1578172466011,17.0617874579862,21.8487192547221,22.496603290639,25.8360424774493,19.5662263601222,15.2309283655312,16.8696931956902,23.2482638896033,23.0708210688004,19.6099212552718,18.2477566438784,17.8502594112999,20.0700181851817,18.3374170675052,19.8002870178651,19.25073290…
ENSG00000065978,1048.19783403987,1009.97668974219,1097.35211631612,995.826897391227,941.835585055757,937.173838017253,836.353437756096,824.558666071227,990.688431117365,958.558973132822,1006.98159762348,977.129960942859,843.894549647044,857.830756599705,952.390161554175,910.655661874046,861.644317797151,898.647920570761,827.453941253549,857.492810211132,870.616421079502,880.010092872695,838.56328…
ENSG00000065989,14.8782659593571,14.8279416474912,16.7843201666891,16.8232336888981,7.86058331724878,10.7589060762123,12.4698263018827,15.4334840906266,5.22237679747015,5.58557640000775,5.99096637158245,5.1684371517304,26.575126048572,21.7797339794764,10.9040529747697,11.8809791809371,10.935511643401,24.2702375915615,24.0853799641491,9.98367912280777,19.8166197246791,20.0639712275461,10.407640051…
ENSG00000066027,49.7084922605249,53.2338823810992,38.6769116884574,37.8794100479061,50.7782206990159,46.4826524651892,52.0669940324224,51.8225245611864,42.8803319356903,37.6794960464611,61.2825935093122,52.93956339701,41.1108668123569,39.8837949699732,60.4180545331577,58.4504682142503,52.8275656457531,38.3707768163766,37.7670159201155,45.6580081220438,39.9149923364389,42.2134448407512,45.54192819…
ENSG00000066032,13.3013068945405,14.8279416474912,22.5662097224381,23.6972431531791,10.2703971809309,8.66979810024877,10.8290596832139,14.1591597161711,12.3987040973951,11.4180291049882,9.86013215322945,8.6386735250351,10.2382174075355,10.094385521974,19.6478690394435,18.2986826166234,8.01663447542556,12.6219660580186,12.5058703660005,11.3695883069508,11.9744977009317,11.5781339341754,7.516628925…
ENSG00000066044,161.261205236903,155.824376182469,143.789418417973,144.498914738622,157.785431550614,149.893497275385,145.371922414053,137.839419836926,169.283166258131,161.055929456577,173.862836575299,161.772082849162,144.061830743686,152.814732997057,146.724662512703,144.875541148159,173.323748453303,140.067760483841,128.015932265071,154.503209047051,132.071665819099,139.65674596378,167.814692…
ENSG00000066056,1.4398321896152,2.51498656918579,1.45950610145122,1.62805487311917,3.09833211044843,2.40247417235809,1.31261329493502,1.69909916594054,4.79606032420728,5.7398740906157,2.37142418875139,2.80572302522507,1.61157125859355,1.31665898112704,3.15463167823525,2.33670227658321,6.82441704061868,7.57317963481118,5.41564756590335,6.21092634375188,4.93067552391304,5.896937780139,5.61196277275…
ENSG00000066084,97.2229545178266,96.6697962530787,88.1878494376874,83.3564095037016,92.835210272325,95.1588683051401,83.02279090464,78.5833364247499,91.3738307693417,92.3008785216751,94.6073439512395,91.9243464843478,95.6514941129934,86.3508848455815,78.8315024811178,81.5871118823911,95.1307291083833,78.7250054418705,68.3369212592279,90.7000566066907,68.8416220767287,73.7117222517375,100.74323474…
ENSG00000066117,147.617081154359,141.782367837849,185.385342309333,180.967343896491,166.965674840832,170.784577035021,153.356986624908,149.308339207025,177.489758368441,183.398235056608,172.365094982403,169.155564494491,184.256313899195,181.918382559052,163.286478823438,159.25777910403,150.630506245945,158.82039577004,143.372143455231,143.056625785426,149.93949474147,144.522918196984,142.67990201…
ENSG00000066135,165.512138368148,171.071482258158,139.663506938871,136.322461375845,138.965932805668,143.835084145091,135.089784937062,132.742122339105,152.266033700388,149.329304970373,164.751575218517,154.167096754473,96.0938862231955,94.5251426867452,179.368242487485,176.437477531867,159.839358156177,170.288353502754,151.495614804086,158.275961826107,153.414447015466,148.837750719037,158.83555…
ENSG00000066136,29.6194050435128,27.0885011722719,33.3721683581828,30.6074316146404,30.4669324194095,28.0985022767099,29.2056458123042,29.5926438067977,29.4513630279099,29.6560161348478,30.2044554567282,32.5611540559015,32.1998257354279,32.9987657144964,32.1292378533307,33.0758561685369,25.8176741054731,30.0402792180843,29.1803641873345,24.5613905412006,29.9597236595859,28.7895214388087,25.270838…
ENSG00000066185,0.137126875201448,0.681142195821151,0.561348500558163,0.470326963345538,0.286882602819299,0.208910797596356,0.109384441244585,0.141591597161711,0.497369218806681,0.123438152486359,0.249623598815935,0.0738348164532914,0.126397745772043,0.192012768081026,0.377184222397693,0.296201697031674,0.12333283808347,0.324564841491908,0.427551123623949,0.205319879132294,0.164355850797101,0.191…
ENSG00000066230,5.21082125765502,4.24403983550102,2.66640537765127,2.38781381390812,2.12293126086281,1.67128638077085,3.06276435484838,2.19466975600653,2.16710873908625,2.74649889282149,3.4947303834231,3.17489710749153,1.95916505946666,3.18192587105701,2.81173693060098,2.73163787262544,3.12443189811458,2.74076977259833,2.06649709751575,3.54176791503206,2.30098191115942,2.06153109386973,2.55089216…
ENSG00000066248,1.4398321896152,2.20061324803756,2.38573112737219,2.02602384210386,0.688518246766317,2.71584036875263,2.73461103111462,1.84069076310225,1.8118450113672,1.57383644420108,1.12330619467171,1.32902669615925,2.08556280523871,2.16700123977158,2.1945263848593,2.56708137427451,1.97332540933552,2.95714633359294,2.10212635781775,1.92487386686525,2.77057005629399,2.68478468038849,2.040713735…
ENSG00000066279,263.352163824381,252.96573241727,275.032697848472,290.191736384197,305.472595481989,306.785506270249,290.087538180639,298.61667841405,305.064962992355,278.35303385674,358.709111498499,339.640155685141,285.848502063475,275.757765359794,291.803430236761,295.708027536621,281.60998029059,241.331991029316,230.877606756932,316.269608818407,254.281980590372,270.971482384924,321.344389557…
ENSG00000066294,0,0.0523955535247039,0,0,0,0,0,0,0,0,0,0,0,0,0,0,0,0,0,0,0,0,0,0.141399855743867,0,0,0,0,0,0,0,0,0,0.0337019960984547,0,0,0,0,0,0,0,0,0,0,0,0
ENSG00000066322,11.3129672041195,11.9985817571572,10.3007449852423,9.80450823589545,16.6965674840832,19.1153379800666,13.4542862730839,13.4512017303626,15.9513413745857,18.4848633348323,15.476663126588,16.982007784257,11.5969931745849,11.7676396438229,13.3728951577364,13.9543910601589,19.1577008489657,12.5137777775213,12.5771288866045,14.9370212068744,13.8293708742132,12.9205262743696,17.31205485…
ENSG00000066336,0,0.0523955535247039,0.0280674250279081,0.0723579943608521,0.114753041127719,0,0.109384441244585,0,0.0355263727719058,0.0617190762431796,0,0.0738348164532914,0,0,0.0685789495268533,0.131645198680744,0,0.504878642320745,0.0356292603019958,0.0769949546746101,0.305232294337474,0.143827750735098,0.102035686777379,0.141399855743867,0.0622584857148683,0.0774096801269457,0.13294335287057…
ENSG00000066379,14.1240681457491,11.684208436009,10.6656215106051,11.7943530808189,14.4588831820927,13.2658356473686,13.1261329493502,12.743243744554,16.5552897117081,17.7750939580357,14.7277923301402,11.4443965502602,12.0709847212301,12.2065259708652,13.5786320063169,13.3619876660955,14.3888311097382,11.2155184115537,13.1471970514364,11.6519031407577,14.9329030152795,11.8657894356456,13.09457980…
ENSG00000066382,1.988339690421,1.3622843916423,2.69447280267918,2.53252980262982,4.53274512454492,5.11831454111072,4.48476209102798,3.25660673471936,7.28290641824069,7.28285099669519,7.36389616507009,5.1684371517304,2.74915097054193,3.18192587105701,4.73194751735287,4.96960625019809,3.04221000605893,2.05557732944875,1.53205819298582,3.95240767329665,2.51229657646998,2.63684209681012,2.92502302095…
ENSG00000066405,0.137126875201448,0.576351088771743,0.168404550167449,0.253252980262982,0.114753041127719,0,0,0.141591597161711,0.177631863859529,0.246876304972718,0.499247197631871,0.295339265813166,0.347593800873118,0.192012768081026,0.20573684858056,0.32911299670186,0.328887568222587,0.072125520331535,0.106887780905987,0.102659939566147,0.18783525805383,0.167799042524281,0.272095164739677,0.98…
ENSG00000066422,40.8638088100315,40.5541584281208,39.6312041394063,42.4017846954593,34.1390297354965,33.1123614190224,43.6443920565894,44.0349867172923,40.2513803505693,38.1732486564066,39.8149640111417,38.1726001063517,40.6684747021548,38.5945663842863,38.5413696340915,40.5796324933393,43.9476013037432,39.6690361823443,38.4439718658534,36.7779233495721,38.8584190098861,41.6141625460216,42.684928…
ENSG00000066427,36.6128756787866,41.8116517127137,37.4700124122574,35.4915962339979,34.6554184205713,38.126220561335,35.2217900807563,34.6191455060385,35.064529925871,37.9263723514338,38.3172224182461,39.5016268025109,35.8337609263741,35.0834757679475,38.8156854321989,34.8201550510568,38.397623589987,40.5706051864885,37.8026451804175,40.7046660379772,37.2852987236853,35.0460285957855,37.175001882…
ENSG00000066455,48.8171675717155,50.9284780260122,37.5261472623132,35.6363122227196,52.2126337131123,47.6316618519691,39.3783988480506,35.822674081913,44.5500714559699,43.1107747558609,54.168320943058,49.2478225743454,32.610618409187,36.4275651445147,42.0731855347245,41.5998827831151,50.3197979380558,49.0092910652781,45.7123409674605,46.4279576687899,51.7955724083436,47.3193299918471,51.834128882…
ENSG00000066468,164.82650399214,178.249673091043,214.322857513107,199.961317416215,150.785496041823,149.580131078991,114.197356659347,113.556460923693,128.534416688755,127.203016137193,179.229743949842,170.70609564001,212.948602189449,217.221301490521,170.898742220918,170.315975793213,136.529451758401,219.477958368861,204.084403009832,147.317013277421,189.05618723118,199.992487397153,132.06819058…
ENSG00000066557,68.6320010383247,63.9749708536635,69.972090594575,70.0787175384852,76.1386427882419,70.8207603851647,59.9426738020325,59.1144918150145,72.7224850640912,69.6808370785497,44.9322477868684,37.1389126760056,57.8901675635956,65.8878098472322,34.3923431877169,33.0100335691966,77.5763551545027,52.3991905208602,56.5792653595693,71.9132876660858,59.0037504361593,54.3668897778669,72.3433019…
ENSG00000066583,28.1795728538976,28.1888077962907,29.1620546039966,30.7159686061817,32.2456045568892,32.1722628298388,31.2839501959513,30.0174185982828,29.3447839095942,29.7485947492126,32.5758796454796,31.4536318091021,30.7778510954924,30.5574605203233,32.7464483990724,28.6986533124022,53.2386751060313,37.7577098935586,35.5580017813918,45.7350030767184,36.3226430261594,36.2206218934554,46.868392…
ENSG00000066629,46.9659547564959,42.0212339268125,46.7041952464391,44.6810615178262,47.450382506312,49.4074036315382,71.7561934564477,67.7515792418789,34.1053178610296,33.8837728575056,42.3111999993011,42.0858453783761,101.149796054077,98.5574108164468,51.6742384684839,52.3618777752659,58.2542105214257,41.9409900727876,38.6933766879674,47.0695822910783,39.8915129291821,42.1655022571728,55.9835801…
ENSG00000066651,24.5457106610592,25.3594479059567,25.8220310256755,23.9866751306225,24.1555151573849,22.1445445452137,18.5953550115794,22.583859747293,20.9960863081963,22.496603290639,21.9668766958023,20.7475834233749,20.0656421413118,22.9866713788429,22.2538691214639,21.22778828727,22.1999108550246,16.3003675949269,18.2778105349238,20.8399677319278,20.0514137972464,21.3104784005836,18.0943284551…
ENSG00000066654,129.584897065368,137.852701323496,144.322699493504,148.62332041719,138.334791079466,132.44944567609,123.82318748887,124.10503491224,134.716005551067,129.27060519134,138.041850145212,134.82237484371,162.800296554391,159.315736716372,123.167793350228,127.46546362263,128.307262552837,126.688476462341,124.773669577589,117.622625757913,129.277616355548,129.468946953377,121.082348309156…
ENSG00000066697,32.9104500483475,30.3894210443283,32.0529993818711,31.5842645385119,35.5160662290292,38.8574083529222,24.6114992800316,27.3271782522103,38.2974298481145,37.2474625127589,41.6871410022612,38.246434922805,22.6567959296387,25.1262422231743,35.8325011277808,33.8328160609512,32.5598692540361,22.2146602621128,23.5509410596192,29.9253723835318,25.7334303533747,26.4882774270471,32.7194435…
ENSG00000066735,53.6166082037661,44.2742427283748,59.1099971087745,48.7331092020339,50.720844178452,56.4059153510161,58.1925227421192,54.7251523030015,59.5422007657141,68.4773150918077,52.4209557513464,49.395492207252,58.0797641822537,60.0451356184809,51.0570279227423,48.9720139092368,58.2130995753979,64.6605289772212,55.5460168108114,58.2595157037883,53.1808574364906,52.0416744743162,53.84083072…
ENSG00000066739,48.4057869461111,51.2952469006851,49.1460612238672,52.4595459116177,68.3354359915569,66.329178236843,49.7699207662861,50.6897917838927,70.7330081888645,68.0144220199839,77.5081274323479,71.3982675103328,65.5056317463612,61.553807367689,62.0639493218022,61.8732433799497,62.8175255305141,47.5307178984816,42.006897896053,65.035071715154,44.6578326022981,48.5658371648846,68.0578030805…
ENSG00000066777,293.725766681502,286.184513351933,224.483265373209,226.950849312812,295.718586986133,280.149379576713,234.192088704656,218.334242823359,259.66225858986,254.86892534621,329.877585835259,289.063306414636,250.235937192202,240.866302359927,250.038849974907,254.79928204658,252.626763340975,242.125371752963,219.191209377878,253.287735894576,245.82939397795,249.469233650027,259.170644414…
ENSG00000066813,0,0,0,0,0,0,0,0,0,0,0,0,0,0,0,0,0,0,0,0,0,0,0,0,0,0,0.0332358382176444,0,0,0,0,0,0,0,0,0,0.0359584978524506,0,0,0,0,0,0,0,0,0
ENSG00000066827,12.1357284553281,11.3698351148607,12.8829480878098,12.3732170357057,11.1884215099526,11.9079154629923,10.9384441244585,9.98220759990066,10.2671217310808,11.6957649480825,11.1082501473091,10.4845439363674,10.5226123355226,8.91487851804765,10.9726319242965,10.9923740898421,4.93331352333881,6.63554787050122,5.77194016892331,5.8772815401619,8.0064778745445,8.07832533295465,6.700343431…
ENSG00000066855,46.8973913188952,50.6665002583887,36.2069782860015,32.3440234793009,45.0979451631937,46.0648308699965,29.5337991360379,34.831532901781,41.0684869243231,38.7287203425952,42.3111999993011,37.6557563911786,32.7370161549591,34.3154246956234,43.2047382019176,44.1669641573896,42.3031634626303,35.6660698039441,37.6601281392095,39.2674268840511,40.5489363323705,38.4499520298494,39.2157156…
ENSG00000066923,10.0788253273064,11.7889995430584,5.8660918308328,5.60774456296603,6.19666422089685,7.20742251707428,7.00060423965343,6.93798826092386,5.75527238904874,6.85081746299293,5.99096637158245,6.12828976562319,5.21390701309677,5.76038304243079,8.09231604416868,8.72149441259929,9.53773947845503,9.08781556177342,9.97619288455881,11.2155983976015,10.3778980074741,8.4378947097924,8.605009584…
ENSG00000066926,33.9389016123584,29.8654655090812,31.2390440560618,26.9533528994174,39.3602931068078,36.977211174555,27.2367258699016,27.3271782522103,40.8553286876917,43.2650724464689,35.3217392324549,34.4070244672338,29.1978792733419,27.8967121626291,32.1978168028576,31.4632024846978,12.9088370527365,15.2545475501197,11.7576558996586,15.6813057687289,17.3043231482091,18.0024401336764,12.3803299…
ENSG00000066933,59.0331197742233,62.2983131408729,50.8020393005137,51.0847440187616,68.6796951149401,66.329178236843,44.3006987040569,42.689866544256,51.655346010351,50.023311295097,77.38331563294,62.0212458207648,59.7861337501762,52.5292072678808,51.3999226703765,64.5390586532347,57.8431010611475,65.77847454236,52.2324956027258,65.2147266093947,56.2097009726086,60.0001433483249,62.7859592636806,…
ENSG00000067048,266.917462579618,275.653007093467,200.738223799599,216.314224141767,0,0,0,0,0,0,0,0,0,0,0,0,0,0,0,0,0,0,0,0,0,0,0,29.4284687441315,22.0192848355813,0,0,0,0,0,0,0,0,0,0,0,0,0,0,0,0,0
ENSG00000067057,98.1828426442367,94.0500185768435,73.7331255483147,69.7531065638614,82.3926835297026,93.4875819243693,81.4914087272158,80.990393576499,81.3909200204362,85.2031847537094,77.1336920341241,73.982486086198,90.4375870998966,81.0568185256332,87.7124764448453,84.8782418494097,82.3452248937302,80.1675158485012,74.5007832914731,70.9380182402074,80.0412993381883,77.1396169775907,75.57443200…
ENSG00000067064,80.973419806455,79.2220769293523,148.252138997411,146.05461161738,84.6303678316931,76.2524411226699,100.633685945018,96.8486524586107,97.3777877677938,91.1590756111762,87.4930713849854,91.3336679527215,120.962642703845,125.192324788829,55.6518175410414,55.389717344923,111.616218465541,69.5650643597656,76.5672803889889,86.4653340995871,69.6868807379709,77.7868418558986,115.06224278…
ENSG00000067066,0.137126875201448,0,0.112269700111633,0.108536991541278,0.286882602819299,0,0.21876888248917,0.212387395742567,0.248684609403341,0.154297690607949,0.124811799407968,0.295339265813166,0.410792673759139,0.24687355896132,0.10286842429028,0.065822599340372,0.411109460278234,0.468815882154978,0.320663342717962,0.205319879132294,0.352191108850931,0.479425835783659,0.408142747109516,0,0.…
ENSG00000067082,26.5340503514802,24.8354923707096,45.3569588450996,43.30625962497,34.3111592971881,32.4856290262333,39.5971677305397,34.5483497074576,29.3447839095942,29.0079658342944,32.9503150437035,31.3059621761956,30.9674477141505,28.1710161170306,34.0151589653192,32.2201623771121,33.7931976348708,55.6087761756135,49.7028181212841,43.2454995422393,55.48183934765,51.5862199303217,36.5627877618…
ENSG00000067113,33.3218306739519,31.1753543471988,30.9022349557269,33.8273623636983,48.1962772736422,51.078690012309,34.0185612270659,39.0792808166324,15.7381831379543,15.8926621326187,33.8239976395593,35.21920744822,54.0982351904343,53.0778151766837,38.575659108855,43.2783590662946,35.3554135839281,36.5676388080883,37.4107233170955,40.884320932218,39.5393218203312,36.6041625620824,36.59679965748…
ENSG00000067141,112.992545165993,109.559102420156,120.044376844363,113.167903180373,112.400603784601,110.722722726069,93.5236972641201,89.7690726005251,114.146235716133,110.785741856507,143.159133920939,123.37797829345,96.8206732613848,96.5824223447562,120.218898520574,114.300943754556,106.600683050146,84.6392981090564,72.0779935909374,103.737868931591,81.9900901404968,89.4129183736524,111.899136…
ENSG00000067167,166.540589932159,164.102873639373,169.976325969012,160.164420517746,170.3508895541,151.982605251349,152.481911094951,157.733039238147,154.326563321159,153.74221892176,170.243294392468,175.505358709474,191.33458766243,196.291909769689,153.754004839205,146.488194831998,180.805940630367,158.171266087056,160.866110263511,155.016508744882,165.835053454275,166.864162144502,176.283654855…
ENSG00000067177,21.9403000322317,20.0674969999616,12.8829480878098,11.6858160892776,26.16369337712,22.3534553428101,18.3765861290903,17.2741748537288,15.7026567651824,16.9727459668744,21.2180058993545,17.2035122336169,26.575126048572,26.4703315997415,14.1615530772952,15.3695769459769,24.7899004547775,21.9982837011182,17.6008545891859,19.1717437139779,22.1880398576087,20.1119138111245,21.699589387…
ENSG00000067182,15.2210831473607,13.5180528093736,39.9680132397412,38.639168988695,30.4669324194095,28.6207792707008,28.6587236060812,27.964340439438,29.3803102823661,31.1681335028057,25.8360424774493,28.9432480496902,40.5736763928257,35.3852101177891,27.9116324574293,27.8100482213072,22.4465765311916,25.9651873193526,24.2635262656591,19.7107083967002,24.7472952485921,25.3376554211664,22.24377971…
ENSG00000067191,6.23927282166588,4.29643538902572,11.7321836616656,12.8797229962317,4.87700424792808,6.58069012428521,4.59414653227257,6.23003027511531,8.77501407466073,8.48637298343719,5.11728377572668,5.98062013271661,5.0243103944387,5.37635750626874,5.89778965930938,6.41770343568627,5.96108717403439,10.4582004480726,10.8312951318067,6.13393138907727,10.0961451203934,9.15703346346788,6.02010551…
ENSG00000067208,25.8484159754729,30.2846299372789,16.3071739412146,17.6191716268675,29.8931672137709,32.1722628298388,19.4704305415361,20.106006796963,25.650041141316,24.903647264123,25.7112306780413,26.4328642902783,20.1604404506408,20.0790494621873,25.4427902744626,23.5974018635234,25.2832318071114,22.5752878637705,21.0925220987815,28.1031584562327,20.9905900875155,21.5981339020538,29.556337269…
ENSG00000067221,1.02845156401086,1.25749328459289,0.982359875976785,0.940653926691077,1.43441301409649,1.35792018437631,1.4219977361796,1.48671177019797,1.42105491087623,1.41953875359313,0.998494395263742,1.40286151261254,1.26397745772043,1.15207660848616,1.81734216246161,2.1063231788919,1.64443784111294,2.30801665060912,1.78146301509979,1.66822401794989,1.59659969345755,2.01358851029137,1.190416…
[truncated: 59,578 more rows]

## Sheet: CPM_count_hESC_vs_HEP_1q
gene_id,VUB02_hESC_1,VUB02_hESC_2,VUB02_hESC_4,VUB02_hESC_3,VUB03_hESC_1,VUB03_hESC_2,VUB03_hESC_5,VUB03_hESC_6,VUB03_hESC_3,VUB03_hESC_4,VUB04_hESC_4,VUB04_hESC_3,VUB04_hESC_5,VUB04_hESC_6,VUB04_hESC_1,VUB04_hESC_2,VUB13_hESC_1,VUB13_hESC_7,VUB13_hESC_8,VUB13_hESC_5,VUB13_hESC_9,VUB13_hESC_10,VUB13_hESC_4,VUB13_hESC_6,VUB13_hESC_2,VUB13_hESC_3,VUB14_hESC_9,VUB14_hESC_8,VUB14_hESC_10,VUB14_hESC_1…
[truncated: 60,583 more rows]

[truncated: 4 more sheets: CPM_count_hESC_vs_NE_1q, CPM_count_hESC_vs_WT_CP, CPM_count_hESC_vs_WT_HEP, CPM_count_hESC_vs_WT_NE]
